# Supplementary material for: Early evolution of beetles regulated by the end-Permian deforestation
Source: eLife. 2021 Nov 8;10:e72692. doi: 10.7554/eLife.72692 (PMC8585485; doi:10.7554/eLife.72692)
Supplement: Figure 2—source data 1. [file elife-72692-fig2-data1.xlsx]

## Sheet: Asselian
Number
Family(or Parent taxon)	Species	Time range
	Previous name
Stratigraphy information
Reference
P1-1; P1; 1
Tshekardocoleidae	Avocoleus fractus Kukalová, 1968	298.90000 to 295.50000 Ma
	Previous name: Moravocoleus fractus Kukalová ,1968
Letovice Formation, Obora, Czech Republic
J. Kukalová. 1968. On the systematic position of the supposed Permian beetles, Tschecardocoleidae, with a description of a new collection from Moravia. Sbornik geologickych ved, paleontologie 11:139-161
P1-2; P2; 2
Tshekardocoleidae	Avocoleus neglegens Kukalová, 1968	298.90000 to 295.50000 Ma
	Previous name: Moravocoleus neglegens Kukalová, 1968
Letovice Formation, Obora, Czech Republic
J. Kukalová. 1968. On the systematic position of the supposed Permian beetles, Tschecardocoleidae, with a description of a new collection from Moravia. Sbornik geologickych ved, paleontologie 11:139-161
P1-3; P3; 3
Tshekardocoleidae	Boscoleus blandus Kukalová, 1968	298.90000 to 295.50000 Ma
Letovice Formation, Obora, Czech Republic
J. Kukalová. 1968. On the systematic position of the supposed Permian beetles, Tschecardocoleidae, with a description of a new collection from Moravia. Sbornik geologickych ved, paleontologie 11:139-161
P1-4; P4; 4
Tshekardocoleidae	Eocoleus scaber Kukalová, 1968	298.90000 to 295.50000 Ma
Letovice Formation, Obora, Czech Republic
J. Kukalová. 1968. On the systematic position of the supposed Permian beetles, Tschecardocoleidae, with a description of a new collection from Moravia. Sbornik geologickych ved, paleontologie 11:139-161
P1-5; P5; 5
Oborocoleidae	Liberocoleus intactus Kukalová, 1968	298.90000 to 295.50000 Ma
Letovice Formation, Obora, Czech Republic
J. Kukalová. 1968. On the systematic position of the supposed Permian beetles, Tschecardocoleidae, with a description of a new collection from Moravia. Sbornik geologickych ved, paleontologie 11:139-161
P1-6; P6; 6
Tshekardocoleidae	Moravocoleus permianus Kukalová, 1968	298.90000 to 295.50000 Ma
Letovice Formation, Obora, Czech Republic
J. Kukalová. 1968. On the systematic position of the supposed Permian beetles, Tschecardocoleidae, with a description of a new collection from Moravia. Sbornik geologickych ved, paleontologie 11:139-161
P1-7; P7; 7
Oborocoleidae	Oborocoleus rohdendorfi Kukalová 1968	298.90000 to 295.50000 Ma
Letovice Formation, Obora, Czech Republic
J. Kukalová. 1968. On the systematic position of the supposed Permian beetles, Tschecardocoleidae, with a description of a new collection from Moravia. Sbornik geologickych ved, paleontologie 11:139-161
P1-8; P8; 8
Tshekardocoleidae	Prosperocoleus prosperus Kukalová 1968	298.90000 to 295.50000 Ma
Letovice Formation, Obora, Czech Republic
J. Kukalová. 1968. On the systematic position of the supposed Permian beetles, Tschecardocoleidae, with a description of a new collection from Moravia. Sbornik geologickych ved, paleontologie 11:139-161
P1-9; P9; 9
Tshekardocoleidae	Retelytron conopeum Kukalová, 1968	298.90000 to 295.50000 Ma
Letovice Formation, Obora, Czech Republic
J. Kukalová. 1968. On the systematic position of the supposed Permian beetles, Tschecardocoleidae, with a description of a new collection from Moravia. Sbornik geologickych ved, paleontologie 11:139-161
P1-10; P10; 10
Tshekardocoleidae	Umoricoleus perplex Kukalová, 1968	298.90000 to 295.50000 Ma
Letovice Formation, Obora, Czech Republic
J. Kukalová. 1968. On the systematic position of the supposed Permian beetles, Tschecardocoleidae, with a description of a new collection from Moravia. Sbornik geologickych ved, paleontologie 11:139-161
P1-11; P11; 11
Tshekardocoleidae	Votocoleus submissus Kukalová, 1968	298.90000 to 295.50000 Ma
Letovice Formation, Obora, Czech Republic
J. Kukalová. 1968. On the systematic position of the supposed Permian beetles, Tschecardocoleidae, with a description of a new collection from Moravia. Sbornik geologickych ved, paleontologie 11:139-161
P1-12; P12; 12
Tshekardocoleidae	Coleopsis archaica Kirejtshuk et al, 2014	298.90000 to 295.50000 Ma
Meisenheim Formation, Grügelborn, Saarland, Germany
A. G. Kirejtshuk, M. Poschmann, and A. Nel. 2014. Taxonomic names, in Evolution of the elytral venation and structural adaptations in the oldest Palaeozoic beetles (Insecta: Coleoptera: Tshekardocoleidae). Journal of Systematic Palaeontology 12:575-600

## Sheet: Sakmarian
Number
Family(or Parent taxon)	Species	Time range
	Previous name
Stratigraphy information
Reference
P2-1; P13; 13
Coleoptera	Pachypleurites nodosus Haupt, 1952	295.50000 to 290.10000 Ma
Goldlauterer Schichten Formation, Pochwerksgrund near Goldlauter, Germany
H. Haupt. 1952. Insektenfunde aus den Goldlauterer Schichten des Thüringer Waldes. Hallesches Jahrbuch für Mitteldeutsche Erdgeschichte 1:241-258

## Sheet: Artinskian
Number
Family(or Parent taxon)	Species	Time range
	Previous name
Stratigraphy information
Reference
P3-1; P14; 14
Permocupedinae	Afrocupes firmae Geertsema and van den Heever, 1996	290.10000 to 279.30000 Ma
Whitehill Formation, Kenmoore Farm, South Africa
H. Geertsema and J. A. van den Heever. 1996. A new beetle, Afrocupes firmae gen. et sp. nov. (Permocupedidae), from the late Palaeozoic Whitehill Formation of South Africa. South African Journal of Science 92:497-499
P3-2; P15; 15
Tshekardocoleidae	Permocoleus wellingtonensis Lubkin and Engel, 2005	290.10000 to 279.30000 Ma
	Previous name: Permocoleus wellingtoniensis Lubkin and Engel, 2005
Wellington Formation, Oklahoma, United States
S. H. Lubkin and M. S. Engel. 2005. Permocoleus, New Genus, the First Permian Beetle (Coleoptera) from North America. Annals of the Entomological Society of America 98:73-76

## Sheet: Kungurian
Number
Family(or Parent taxon)	Species	Time range
	Previous name
Stratigraphy information
Reference
P4-1; P16; 16
Permocupedinae	Maricoleus valentinae Shcherbakov, 2009	279.30000 to 272.30000 Ma
Pospelovo Formation, Cape Novosilsky, Russky Island, Russian
D. E. Shcherbakov. 2009. Taxonomic names, in Permian insects from the Russky Island, South Primorye. Russian Entomological Journal 18(1):7-16
P4-2; P17; 17
Permocupedinae	Pintolla ponomarenkoi Pinto, 1987	279.30000 to 272.30000 Ma
Irati Formation, Road Cut on Road BR 290 near Minas do Leao, Brazil
I. D. Pinto. 1987. Permian insects from Paraná Basin, South Brazil IV Coleoptera. Pesquisas 19:5-12
P4-3; P18; 18
Tshekardocoleidae	Sylvacoleodes admirandus Ponomarenko, 1969	279.30000 to 272.30000 Ma
Koshelevka Formation, Chekarda, Sylva River, Russian
A. G. Ponomarenko. 1969. Istoricheskoe Razvitie Zhestkokrylykh-Arkhostemat [Historical Development of the Archostomate Beetles]. Trudy Akademiya Nauk SSSR 125:1-240
P4-4; P19; 19
Tshekardocoleidae	Sylvacoleus richteri Ponomarenko, 1963	279.30000 to 272.30000 Ma
Koshelevka Formation, Chekarda, Sylva River, Russian
A. G. Ponomarenko. 1963. Paleozoyskie zhuki Cupididea evropeyskoy chasti SSSR. Paleontologicheskii Zhurnal 1963(1):70-85
P4-5; P20; 20
Tshekardocoleidae	Sylvacoleus sharovi Ponomarenko, 1963	279.30000 to 272.30000 Ma
Koshelevka Formation, Chekarda, Sylva River, Russian
A. G. Ponomarenko. 1963. Paleozoyskie zhuki Cupididea evropeyskoy chasti SSSR. Paleontologicheskii Zhurnal 1963(1):70-85
P4-6; P21; 21
Tshekardocoleidae	Tshekardocoleus magnus Rohdendorf, 1944	279.30000 to 272.30000 Ma
Koshelevka Formation, Russian
(1) B. B. Rohdendorf. 1944. A new family of Coleoptera from the Permian of the Urals. Comptes Rendus (Doklady) de l'Académie des Sciences de l'URSS 44(6):252-253
(2) A. G. Ponomarenko. 2000. New beetles from the Permian of european Russia. Paleontological Journal 34(Suppl 3):S312-S316
P4-7; P22; 22
Tshekardocoleidae	Tshekardocoleus minor Ponomarenko, 1963	279.30000 to 272.30000 Ma
Koshelevka Formation, Chekarda, Sylva River, Russian
A. G. Ponomarenko. 1963. Paleozoyskie zhuki Cupididea evropeyskoy chasti SSSR. Paleontologicheskii Zhurnal 1963(1):70-85
P4-8; P23; 23
Tshekardocoleidae	Uralocoleus splendens Zalessky, 1947	279.30000 to 272.30000 Ma
Koshelevka Formation, Barda Locality, Krutaya Katushka, Russian
G. M. Zalessky. 1947. O dvukh novykh Permskikh zhukakh. Doklady Akademii Nauk SSSR 56:857-860

## Sheet: Roadian
Number
Family(or Parent taxon)	Species	Time range
	Previous name
Stratigraphy information
Reference
P5-1; P24; 24
Permocupedinae	Permocupes sojanensis Ponomarenko, 1963	272.30000 to 268.80000 Ma
Iva-Gora Beds Formation, Russian
A. G. Ponomarenko. 1963. Paleozoyskie zhuki Cupididea evropeyskoy chasti SSSR. Paleontologicheskii Zhurnal 1963(1):70-85
P5-2; P25; 25
Permocupedinae	Permocupes grandis Ponomarenko, 1963	272.30000 to 268.80000 Ma
Iva-Gora Beds Formation, Russian
A. G. Ponomarenko. 1963. Paleozoyskie zhuki Cupididea evropeyskoy chasti SSSR. Paleontologicheskii Zhurnal 1963(1):70-85
P5-3; P26; 26
Permocupedinae	Permocupes semenovi Martynov, 1932	272.30000 to 268.80000 Ma
Iva-Gora Beds Formation, Russian
A. V. Martynov. 1932. Permian fossil Insects from the Arkhangelsk district. Part II. Neuroptera, Megaloptera and Coleoptera, with the description of two new beetles from Tikhie Gory. Akademiya Nauk SSSR, Trudy Paleontologicheskogo Instituta 2:63-96
P5-4; P27; 27
Permosynidae	Permocrossos elongatus Martynov, 1932	272.30000 to 268.80000 Ma
Iva-Gora Beds Formation, Soyana, Russian
A. V. Martynov. 1932. Permian fossil Insects from the Arkhangelsk district. Part II. Neuroptera, Megaloptera and Coleoptera, with the description of two new beetles from Tikhie Gory. Akademiya Nauk SSSR, Trudy Paleontologicheskogo Instituta 2:63-96
P5-5; P28; 28
Sojanocoleidae	Sojanocoleus reticulatus Martynov, 1932	272.30000 to 268.80000 Ma
Sheimo-Gora Beds Formation, Soyana, Russian
A. V. Martynov. 1932. Permian fossil Insects from the Arkhangelsk district. Part II. Neuroptera, Megaloptera and Coleoptera, with the description of two new beetles from Tikhie Gory. Akademiya Nauk SSSR, Trudy Paleontologicheskogo Instituta 2:63-96
P5-6; P29; 29
Rhombocoleidae	Rossocoleus altus Ponomarenko, 2004	272.30000 to 268.80000 Ma
Belebeevo Formation, Kityak, Russian
A. G. Ponomarenko. 2004. Beetles (Insecta, Coleoptera) of the Late Permian and Early Triassic. Paleontological Journal 38(Suppl 2):S185-S196
P5-7; P30; 30
Permocupedinae	Uralocupes major Ponomarenko, 1963
Belebeevo Formation, Kityak, Russian
A. G. Ponomarenko. 1963. Paleozoyskie zhuki Cupididea evropeyskoy chasti SSSR. Paleontologicheskii Zhurnal 1963(1):70-85
P5-8; P31; 31
Permocupedinae	Kaltanicupes kitjakensis Ponomarenko, 1963	272.30000 to 268.80000 Ma
Belebeevo Formation, Kityak , Russian
A. G. Ponomarenko. 1963. Paleozoyskie zhuki Cupididea evropeyskoy chasti SSSR. Paleontologicheskii Zhurnal 1963(1):70-85
P5-9; P32; 32
Permocupedinae	Kaltanicupes acutus Ponomarenko, 1963	272.30000 to 268.80000 Ma
Belebeevo Formation, Kityak, Russian
A. G. Ponomarenko. 1963. Paleozoyskie zhuki Cupididea evropeyskoy chasti SSSR. Paleontologicheskii Zhurnal 1963(1):70-85
P5-10; P33; 33
Permocupedinae	Permocupes distinctus Martynov, 1932	272.30000 to 268.80000 Ma
	Previous name: Permocupoides distinctus Martynov, 1932
Baitugan Formation, Tikhie Gory, Russian
A. V. Martynov. 1932. Permian fossil Insects from the Arkhangelsk district. Part II. Neuroptera, Megaloptera and Coleoptera, with the description of two new beetles from Tikhie Gory. Akademiya Nauk SSSR, Trudy Paleontologicheskogo Instituta 2:63-96
P5-11; P34; 34
Coleoptera	Elateridopsis permiensis Zalessky, 1929	272.30000 to 268.80000 Ma
Baitugan Formation, Bogatyi log, Kama River, Russian
M. D. Zalessky. 1932. Observations sur les nouveaux insectes Permiens de l'Europe orientale. Bulletin de la Société Géologique de France, Cinquième Série 2:183-210
P5-12; P35; 35
Permocupedinae	Eocupes cellulosus Ponomarenko, 1969	272.30000 to 268.80000 Ma
Mitina Formation, Kaltan, Russian
A. G. Ponomarenko. 1969. Istoricheskoe Razvitie Zhestkokrylykh-Arkhostemat [Historical Development of the Archostomate Beetles]. Trudy Akademiya Nauk SSSR 125:1-240
P5-13; P36; 36
Permocupedinae	Kaltanocoleus pospelovi Rohdendorf, 1961	272.30000 to 268.80000 Ma
Mitina Formation, Russian
B. B. Rohdendorf. 1961. Superorder Coleopteroidea, in Paleozoiskie nasekomye kuznetskogo basseina. Akademiya Nauk SSSR, Trudy Paleontologicheskogo Instituta 85:393-469
P5-14; P37; 37
Permocupedinae	Archicupes jacobsoni Rohdendorf, 1961	272.30000 to 268.80000 Ma
Mitina Formation, Russian
B. B. Rohdendorf. 1961. Superorder Coleopteroidea, in Paleozoiskie nasekomye kuznetskogo basseina. Akademiya Nauk SSSR, Trudy Paleontologicheskogo Instituta 85:393-469
P5-15; P38; 38
Permocupedinae	Cytocupes angustus Rohdendorf, 1961	272.30000 to 268.80000 Ma
Mitina Formation, Kaltan, Russian
B. B. Rohdendorf. 1961. Superorder Coleopteroidea, in Paleozoiskie nasekomye kuznetskogo basseina. Akademiya Nauk SSSR, Trudy Paleontologicheskogo Instituta 85:393-469
P5-16; P39; 39
Permocupedinae	Protocupoides plavilstshikovi Rohdendorf, 1961	272.30000 to 268.80000 Ma
Mitina Formation, Kaltan, Russian
B. B. Rohdendorf. 1961. Superorder Coleopteroidea, in Paleozoiskie nasekomye kuznetskogo basseina. Akademiya Nauk SSSR, Trudy Paleontologicheskogo Instituta 85:393-469
P5-17; P40; 40
Permocupedinae	Protocupoides sharovi Rohdendorf, 1961	272.30000 to 268.80000 Ma
	Previous name: Tomiocupes sharovi Rohdendorf, 1961
Mitina Formation, Kaltan, Russian
B. B. Rohdendorf. 1961. Superorder Coleopteroidea, in Paleozoiskie nasekomye kuznetskogo basseina. Akademiya Nauk SSSR, Trudy Paleontologicheskogo Instituta 85:393-469
P5-18; P41; 41
Permocupedinae	Ichthyocupes tyzhnovi Rohdendorf, 1961	272.30000 to 268.80000 Ma
Mitina Formation, Kaltan, Russian
B. B. Rohdendorf. 1961. Superorder Coleopteroidea, in Paleozoiskie nasekomye kuznetskogo basseina. Akademiya Nauk SSSR, Trudy Paleontologicheskogo Instituta 85:393-469
P5-19; P42; 42
Asiocoleidae	Asiocoleus novojilovi Rohdendorf, 1961	272.30000 to 268.80000 Ma
Mitina Formation, Kaltan, Russian
B. B. Rohdendorf. 1961. Superorder Coleopteroidea, in Paleozoiskie nasekomye kuznetskogo basseina. Akademiya Nauk SSSR, Trudy Paleontologicheskogo Instituta 85:393-469
P5-20; P43; 43
Asiocoleidae	Schizotaldycupes ananjevi Rohdendorf, 1961	272.30000 to 268.80000 Ma
Mitina Formation, Kaltan, Russian
B. B. Rohdendorf. 1961. Superorder Coleopteroidea, in Paleozoiskie nasekomye kuznetskogo basseina. Akademiya Nauk SSSR, Trudy Paleontologicheskogo Instituta 85:393-469
P5-21; P44; 44
Asiocoleidae	Schizotaldycupes beckermigdisovae Rohdendorf, 1961	272.30000 to 268.80000 Ma
	Previous name: Carinicupes beckermigdisovae Rohdendorf, 1961
Mitina Formation, Kaltan, Russian
B. B. Rohdendorf. 1961. Superorder Coleopteroidea, in Paleozoiskie nasekomye kuznetskogo basseina. Akademiya Nauk SSSR, Trudy Paleontologicheskogo Instituta 85:393-469
P5-22; P45; 45
Schizocoleidae	Uskatocoleus kaltanicus Rohdendorf, 1961	272.30000 to 268.80000 Ma
Mitina Formation, Kaltan, Russian
B. B. Rohdendorf. 1961. Superorder Coleopteroidea, in Paleozoiskie nasekomye kuznetskogo basseina. Akademiya Nauk SSSR, Trudy Paleontologicheskogo Instituta 85:393-469
P5-23; P46; 46
Permocupedinae	Cytocupoides elongatus Ponomarenko, 1969	272.30000 to 268.80000 Ma
	Previous name: Cytocupoides longatus Ponomarenko, 1969
Mitina Formation, Kaltan, Russian
A. G. Ponomarenko. 1969. Istoricheskoe Razvitie Zhestkokrylykh-Arkhostemat [Historical Development of the Archostomate Beetles]. Trudy Akademiya Nauk SSSR 125:1-240
P5-24; P47; 47
Permocupedinae	Eocupes lukjanovitshi, Rohdendorf 1961	272.30000 to 268.80000 Ma
Mitina Formation, Kaltan, Russian
B. B. Rohdendorf. 1961. Superorder Coleopteroidea, in Paleozoiskie nasekomye kuznetskogo basseina. Akademiya Nauk SSSR, Trudy Paleontologicheskogo Instituta 85:393-469
P5-25; P48; 48
Rhombocoleidae	Rossocoleus avus Rohdendorf, 1961	272.30000 to 268.80000 Ma
Mitina Formation, Kaltan, Russian
B. B. Rohdendorf. 1961. Superorder Coleopteroidea, in Paleozoiskie nasekomye kuznetskogo basseina. Akademiya Nauk SSSR, Trudy Paleontologicheskogo Instituta 85:393-469
P5-26; P49; 49
Permocupedinae	Kaltanicupes richteri Rohdendorf, 1961	272.30000 to 268.80000 Ma
Mitina Formation, Kaltan, Russian
B. B. Rohdendorf. 1961. Superorder Coleopteroidea, in Paleozoiskie nasekomye kuznetskogo basseina. Akademiya Nauk SSSR, Trudy Paleontologicheskogo Instituta 85:393-469
P5-27; P50; 50
Permocupedinae	Ichthyocupes kuznetskiensis Ponomarenko, 1969	272.30000 to 268.80000 Ma
Mitina Formation, Kaltan, Russian
A. G. Ponomarenko. 1969. Istoricheskoe Razvitie Zhestkokrylykh-Arkhostemat [Historical Development of the Archostomate Beetles]. Trudy Akademiya Nauk SSSR 125:1-240
P5-28; P51; 51
Schizocoleidae	Schizocoleus kuznetskiensis Rohdendorf, 1961	272.30000 to 268.80000 Ma
Uskatskaya Formation, Suriekova II, Russian
B. B. Rohdendorf. 1961. Superorder Coleopteroidea, in Paleozoiskie nasekomye kuznetskogo basseina. Akademiya Nauk SSSR, Trudy Paleontologicheskogo Instituta 85:393-469
P5-29; P52; 52
Taldycupedinae	Tecticupes heckeri Rohdendorf, 1961		272.30000 to 265.10000 Ma
Mitina Formation, Kaltan, Russian
Kazankovo-Markinskaya Formation, Suriekova I, Russian
(1) B. B. Rohdendorf. 1961. Superorder Coleopteroidea, in Paleozoiskie nasekomye kuznetskogo basseina. Akademiya Nauk SSSR, Trudy Paleontologicheskogo Instituta 85:393-469
(2) A. G. Ponomarenko. 1969. Istoricheskoe Razvitie Zhestkokrylykh-Arkhostemat [Historical Development of the Archostomate Beetles]. Trudy Akademiya Nauk SSSR 125:1-240

## Sheet: Wordian
Number
Family(or Parent taxon)	Species	Time range
	Previous name
Stratigraphy information
Reference
P6-1; P52; 52
Taldycupedinae	Tecticupes heckeri Rohdendorf, 1961	272.30000 to 265.10000 Ma
Mitina Formation, Kaltan, Russian
Kazankovo-Markinskaya Formation, Suriekova I, Russian
(1) B. B. Rohdendorf. 1961. Superorder Coleopteroidea, in Paleozoiskie nasekomye kuznetskogo basseina. Akademiya Nauk SSSR, Trudy Paleontologicheskogo Instituta 85:393-469
(2) A. G. Ponomarenko. 1969. Istoricheskoe Razvitie Zhestkokrylykh-Arkhostemat [Historical Development of the Archostomate Beetles]. Trudy Akademiya Nauk SSSR 125:1-240
P6-2; P53; 53
Rhombocoleidae	Rhombocoleites uralensis Ponomarenko, 2013	268.00000 to 265.00000 Ma
Galevo, Russian
A. G. Ponomarenko. 2013. New beetles (Insecta, Coleoptera) from the latter half of the Permian of European Russia. Paleontological Journal 47:705-735
P6-3; P54; 54
Permocupedinae	Permocupes latus Ponomarenko, 2013	268.00000 to 265.00000 Ma
Chepanikha, Rossokha River Valley, Russian
A. G. Ponomarenko. 2013. New beetles (Insecta, Coleoptera) from the latter half of the Permian of European Russia. Paleontological Journal 47:705-735
P6-4; P55; 55
Permocupedinae	Protocupoides elongatus Ponomarenko, 2013	268.00000 to 265.00000 Ma
Chepanikha, Rossokha River Valley, Russian
A. G. Ponomarenko. 2013. New beetles (Insecta, Coleoptera) from the latter half of the Permian of European Russia. Paleontological Journal 47:705-735
P6-5; P56; 56
Rhombocoleidae	Rossocoleus angustus Ponomarenko, 2013	268.00000 to 265.00000 Ma
Chepanikha, Rossokha River Valley, Russian
A. G. Ponomarenko. 2013. New beetles (Insecta, Coleoptera) from the latter half of the Permian of European Russia. Paleontological Journal 47:705-735
P6-6; P57; 57
Rhombocoleidae	Rossocoleus novojilovi Ponomarenko, 2013	268.00000 to 265.00000 Ma
Chepanikha, Rossokha River Valley, Russian
A. G. Ponomarenko. 2013. New beetles (Insecta, Coleoptera) from the latter half of the Permian of European Russia. Paleontological Journal 47:705-735
P6-7; P58; 58
Rhombocoleidae	Erunakicupes obrutshevi Rohdendorf, 1961	268.80000 to 265.10000 Ma
Kazankovo-Markinskaya Formation, Zelevyi Lug, Russian
B. B. Rohdendorf. 1961. Superorder Coleopteroidea, in Paleozoiskie nasekomye kuznetskogo basseina. Akademiya Nauk SSSR, Trudy Paleontologicheskogo Instituta 85:393-469
P6-8; P59; 59
Schizocoleidae	Palademosyne martynovae Rohdendorf, 1961	268.80000 to 265.10000 Ma
Kazankovo-Markinskaya Formation, Suriekova I, ditch 19, Russian
B. B. Rohdendorf. 1961. Superorder Coleopteroidea, in Paleozoiskie nasekomye kuznetskogo basseina. Akademiya Nauk SSSR, Trudy Paleontologicheskogo Instituta 85:393-469
P6-9; P60; 60
Rhombocoleidae	Rossocoleus verrucosus Rohdendorf, 1961
Kazankovo-Markinskaya Formation, Suriekova I, ditch 2, Russian
B. B. Rohdendorf. 1961. Superorder Coleopteroidea, in Paleozoiskie nasekomye kuznetskogo basseina. Akademiya Nauk SSSR, Trudy Paleontologicheskogo Instituta 85:393-469
P6-10; P61; 61
Schizocoleidae	Uskatocoleus convexus Rohdendorf, 1961	272.30000 to 252.17000 Ma
Kazankovo-Markinskaya Formation, Suriekova I, ditch 2, Russian
B. B. Rohdendorf. 1961. Superorder Coleopteroidea, in Paleozoiskie nasekomye kuznetskogo basseina. Akademiya Nauk SSSR, Trudy Paleontologicheskogo Instituta 85:393-469
P6-11; P62; 62
Taldycupedinae	Tecticupes indistinctus Rohdendorf, 1961		268.80000 to 265.10000 Ma
Kazankovo-Markinskaya Formation, Suriekova I, ditch 6, Russian
B. B. Rohdendorf. 1961. Superorder Coleopteroidea, in Paleozoiskie nasekomye kuznetskogo basseina. Akademiya Nauk SSSR, Trudy Paleontologicheskogo Instituta 85:393-469
P6-12; P63; 63
Schizocoleidae	Uskatocoleus iljinskiensis Rohdendorf, 1961	268.80000 to 265.10000 Ma
Kazankovo-Markinskaya Formation, Suriekova I, ditch 6, Russian
B. B. Rohdendorf. 1961. Superorder Coleopteroidea, in Paleozoiskie nasekomye kuznetskogo basseina. Akademiya Nauk SSSR, Trudy Paleontologicheskogo Instituta 85:393-469
P6-13; P64; 64
Schizocoleidae	Uskatocoleus avitus Rohdendorf, 1961	268.80000 to 265.10000 Ma
Kazankovo-Markinskaya Formation, Suriekova I, ditch 6, Russian
B. B. Rohdendorf. 1961. Superorder Coleopteroidea, in Paleozoiskie nasekomye kuznetskogo basseina. Akademiya Nauk SSSR, Trudy Paleontologicheskogo Instituta 85:393-469
P6-14; P65; 65
Schizocoleidae	Uskatocoleus surijokovicus Rohdendorf, 1961	268.80000 to 265.10000 Ma
Kazankovo-Markinskaya Formation, Suriekova I, ditch 6, Russian
B. B. Rohdendorf. 1961. Superorder Coleopteroidea, in Paleozoiskie nasekomye kuznetskogo basseina. Akademiya Nauk SSSR, Trudy Paleontologicheskogo Instituta 85:393-469
P6-15; P66; 66
Rhombocoleidae	Karakanocoleus janischewskyi Rohdendorf, 1961	268.80000 to 265.10000 Ma
Kazankovo-Markinskaya Formation, Suriekova I, ditch 6, Russian
B. B. Rohdendorf. 1961. Superorder Coleopteroidea, in Paleozoiskie nasekomye kuznetskogo basseina. Akademiya Nauk SSSR, Trudy Paleontologicheskogo Instituta 85:393-469
P6-16; P67; 67
Rhombocoleidae	Rossocoleus grandis Rohdendorf, 1961	268.80000 to 265.10000 Ma
Kazankovo-Markinskaya Formation, Suriekova I, ditch 6, Russian
B. B. Rohdendorf. 1961. Superorder Coleopteroidea, in Paleozoiskie nasekomye kuznetskogo basseina. Akademiya Nauk SSSR, Trudy Paleontologicheskogo Instituta 85:393-469
P6-17; P68; 68
Rhombocoleidae	Rossocoleus surijokovensis Rohdendorf, 1961	268.80000 to 265.10000 Ma
Kazankovo-Markinskaya Formation, Suriekova I, ditch 6, Russian
B. B. Rohdendorf. 1961. Superorder Coleopteroidea, in Paleozoiskie nasekomye kuznetskogo basseina. Akademiya Nauk SSSR, Trudy Paleontologicheskogo Instituta 85:393-469
P6-18; P69; 69
Rhombocoleidae	Rossocoleus parvus Rohdendorf, 1961	268.80000 to 265.10000 Ma
Kazankovo-Markinskaya Formation, Suriekova I, ditch 6, Russian
B. B. Rohdendorf. 1961. Superorder Coleopteroidea, in Paleozoiskie nasekomye kuznetskogo basseina. Akademiya Nauk SSSR, Trudy Paleontologicheskogo Instituta 85:393-469
P6-19; P70; 70
Rhombocoleidae	Rossocoleus latus Rohdendorf, 1961	268.80000 to 265.10000 Ma
Kazankovo-Markinskaya Formation, Suriekova I, ditch 6, Russian
B. B. Rohdendorf. 1961. Superorder Coleopteroidea, in Paleozoiskie nasekomye kuznetskogo basseina. Akademiya Nauk SSSR, Trudy Paleontologicheskogo Instituta 85:393-469
P6-20; P71; 71
Rhombocoleidae	Rossocoleus latior Rohdendorf, 1961	268.80000 to 265.10000 Ma
Kazankovo-Markinskaya Formation, Suriekova I, ditch 6, Russian
B. B. Rohdendorf. 1961. Superorder Coleopteroidea, in Paleozoiskie nasekomye kuznetskogo basseina. Akademiya Nauk SSSR, Trudy Paleontologicheskogo Instituta 85:393-469
P6-21; P72; 72
Asiocoleidae	Schizotaldycupes pubescens Ponomarenko, 2013	268.00000 to 265.00000 Ma
Galevo, Russian
A. G. Ponomarenko. 2013. New beetles (Insecta, Coleoptera) from the latter half of the Permian of European Russia. Paleontological Journal 47:705-735
P7-22; P73; 73
Schizocoleidae	Uskatocoleus kushejakovicus Rohdendorf, 1961	268.80000 to 265.10000
Il'inskaya Group, Chistaya Griva, well 296, Russian
B. B. Rohdendorf. 1961. Superorder Coleopteroidea, in Paleozoiskie nasekomye kuznetskogo basseina. Akademiya Nauk SSSR, Trudy Paleontologicheskogo Instituta 85:393-469

## Sheet: Capitanian
Number
Family(or Parent taxon)	Species	Time range
	Previous name
Stratigraphy information
Reference
P7-1; P74; 74
Phoroschizidae	Dikerocoleus divisus Lin, 1982	265.10000 to 259.90000 Ma
Yinping Formation, Houdong, Yinping Mountain, China
A. G. Ponomarenko, E. V. Yan, and D. Y. Huang. 2014. New beetles (Coleoptera) from the terminal Middle Permian of China. Paleontological Journal 48:191-200
P7-2; P75; 75
Permocupedinae	Linicupes yinpinensis Ponomarenko et al. 2014	265.10000 to 259.90000 Ma
Yinping Formation, Houdong, Yinping Mountain, China
A. G. Ponomarenko, E. V. Yan, and D. Y. Huang. 2014. New beetles (Coleoptera) from the terminal Middle Permian of China. Paleontological Journal 48:191-200
P7-3; P76; 76
Coleoptera	Archosyne permiana Ponomarenko et al. 2014	265.10000 to 259.90000 Ma
Yinping Formation, Houdong, Yinping Mountain, China
A. G. Ponomarenko, E. V. Yan, and D. Y. Huang. 2014. New beetles (Coleoptera) from the terminal Middle Permian of China. Paleontological Journal 48:191-200
P7-4; P77; 77
Ademosynidae	Chaocoleus limnebius Ponomarenko et al. 2014	265.10000 to 259.90000 Ma
Yinping Formation, Houdong, Yinping Mountain, China
A. G. Ponomarenko, E. V. Yan, and D. Y. Huang. 2014. New beetles (Coleoptera) from the terminal Middle Permian of China. Paleontological Journal 48:191-200
P7-5; P78; 78
Asiocoleidae	Asiocoleopsis hongi Ponomarenko et al. 2014	265.10000 to 259.90000 Ma
Yinping Formation, Houdong, Yinping Mountain, China
A. G. Ponomarenko, E. V. Yan, and D. Y. Huang. 2014. New beetles (Coleoptera) from the terminal Middle Permian of China. Paleontological Journal 48:191-200
P7-6; P79; 79
Taldycupedinae	Taldycupes pingi Ponomarenko et al. 2014	265.10000 to 259.90000 Ma
Yinping Formation, Houdong, Yinping Mountain, China
A. G. Ponomarenko, E. V. Yan, and D. Y. Huang. 2014. New beetles (Coleoptera) from the terminal Middle Permian of China. Paleontological Journal 48:191-200
P7-7; P80; 80
Schizocoleidae	Stegosyne rugosa Rohdendorf, 1961	265.10000 to 259.90000 Ma
Uskatskaya Formation, Chistaya Griva, Russian
B. B. Rohdendorf. 1961. Superorder Coleopteroidea, in Paleozoiskie nasekomye kuznetskogo basseina. Akademiya Nauk SSSR, Trudy Paleontologicheskogo Instituta 85:393-469
P7-8; P81; 81
Permocupedinae	Tatarocupes granulatus Ponomarenko, 2004	265.10000 to 259.90000 Ma
Orenburg, Novo-Aleksandrovka, Russian
A. G. Ponomarenko. 2004. Beetles (Insecta, Coleoptera) of the Late Permian and Early Triassic. Paleontological Journal 38(Suppl 2):S185-S196
P7-9; P82; 82
Rhombocoleidae	Karakanocoleus europeus Ponomarenko, 2004	265.10000 to 259.90000 Ma
Orenburg, Russian
A. G. Ponomarenko. 2004. Beetles (Insecta, Coleoptera) of the Late Permian and Early Triassic. Paleontological Journal 38(Suppl 2):S185-S196
P7-10; P83; 83
Rhombocoleidae	Erunakicupes brevis Ponomarenko, 2004	265.10000 to 259.90000 Ma
Orenburg, Russian
A. G. Ponomarenko. 2004. Beetles (Insecta, Coleoptera) of the Late Permian and Early Triassic. Paleontological Journal 38(Suppl 2):S185-S196
P7-11; P84; 84
Schizocoleidae	Schizocoleus longus Ponomarenko, 2004	265.10000 to 259.90000 Ma
Orenburg, Russian
A. G. Ponomarenko. 2004. Beetles (Insecta, Coleoptera) of the Late Permian and Early Triassic. Paleontological Journal 38(Suppl 2):S185-S196
P7-12; P85; 85
Schizocoleidae	Schizocoleus glabrus Ponomarenko, 2004	265.10000 to 259.90000 Ma
Orenburg, Russian
A. G. Ponomarenko. 2004. Beetles (Insecta, Coleoptera) of the Late Permian and Early Triassic. Paleontological Journal 38(Suppl 2):S185-S196
P7-13; P86; 86
Schizocoleidae	Pseudochrysomelites ovum Ponomarenko, 2004	265.10000 to 259.90000 Ma
	Previous name: Palademosyne ovum Ponomarenko, 2004
Orenburg, Russian
A. G. Ponomarenko. 2004. Beetles (Insecta, Coleoptera) of the Late Permian and Early Triassic. Paleontological Journal 38(Suppl 2):S185-S196
P7-14; P87; 87
Schizocoleidae	Schizocoleus minimus Ponomarenko, 2013	265.10000 to 259.90000 Ma
Orenburg, Russian
A. G. Ponomarenko. 2013. New beetles (Insecta, Coleoptera) from the latter half of the Permian of European Russia. Paleontological Journal 47:705-735
P7-15; P88; 88
Schizocoleidae	Schizocoleus robustus Ponomarenko, 2013	265.10000 to 259.90000 Ma
Orenburg, Russian
A. G. Ponomarenko. 2013. New beetles (Insecta, Coleoptera) from the latter half of the Permian of European Russia. Paleontological Journal 47:705-735
P7-16; P89; 89
Asiocoleidae	Bicoleus kuplensis Ponomarenko, 2013	265.10000 to 259.90000 Ma
Orenburg, Russian
A. G. Ponomarenko. 2013. New beetles (Insecta, Coleoptera) from the latter half of the Permian of European Russia. Paleontological Journal 47:705-735
P7-17; P90; 90
Asiocoleidae	Tetracoleus orenburgensis Ponomarenko, 2013	265.10000 to 259.90000 Ma
Orenburg, Russian
A. G. Ponomarenko. 2013. New beetles (Insecta, Coleoptera) from the latter half of the Permian of European Russia. Paleontological Journal 47:705-735
P7-18; P91; 91
Rhombocoleidae	Rhombocoleus gomankovi Ponomarenko, 2013	265.10000 to 259.90000 Ma
Orenburg, Russian
A. G. Ponomarenko. 2013. New beetles (Insecta, Coleoptera) from the latter half of the Permian of European Russia. Paleontological Journal 47:705-735
P7-19; P92; 92
Permosynidae	Sakmaracoleus orenburgensis Ponomarenko, 2013	265.10000 to 259.90000 Ma
Vyazovka Formation, Kul'chumovo , Russian
A. G. Ponomarenko. 2013. New beetles (Insecta, Coleoptera) from the latter half of the Permian of European Russia. Paleontological Journal 47:705-735
P7-20; P93; 93
Rhombocoleidae	Aenigmocoleus uralensis Ponomarenko, 2013	265.10000 to 259.90000 Ma
Vyazovka Formation, Kul'chumovo, Russian
A. G. Ponomarenko. 2013. New beetles (Insecta, Coleoptera) from the latter half of the Permian of European Russia. Paleontological Journal 47:705-735
P7-21; P94; 94
Schizocoleidae	Schizocoleus major Ponomarenko, 2013	265.10000 to 259.90000 Ma
Vyazovka Formation, Kul'chumovo, Russian
A. G. Ponomarenko. 2013. New beetles (Insecta, Coleoptera) from the latter half of the Permian of European Russia. Paleontological Journal 47:705-735
P7-22; P95; 95
Rhombocoleidae	Rossocoleus sakmara Ponomarenko, 2013	265.10000 to 259.90000 Ma
Vyazovka Formation, Kul'chumovo, Russian
A. G. Ponomarenko. 2013. New beetles (Insecta, Coleoptera) from the latter half of the Permian of European Russia. Paleontological Journal 47:705-735
P7-23; P96; 96
Rhombocoleidae	Rossocoleus ellipticus Martynov, 1937	265.10000 to 259.90000 Ma
	Previous name: Curculiopsis ellipticus Martynov, 1937
Amanak Formation, Kargala, Russian
A. V. Martynov. 1937. Permian fossil insects from Kargala and their relationships. Akademiya Nauk SSSR, Trudy Paleontologicheskogo Instituta 7:1-92
P7-24; P97; 97
Rhombocoleidae	Rhombocoleites adumbratus Ponomarenko, 1969	265.10000 to 259.90000 Ma
Amanak Formation, Kargala, Russian
A. G. Ponomarenko. 1969. Istoricheskoe Razvitie Zhestkokrylykh-Arkhostemat [Historical Development of the Archostomate Beetles]. Trudy Akademiya Nauk SSSR 125:1-240
P7-25; P98; 98
Taldycupedinae	Tecticupes martynovi Ponomarenko, 2013	265.10000 to 259.90000 Ma
Amanak Formation, Kargala, Russian
A. G. Ponomarenko. 2013. New beetles (Insecta, Coleoptera) from the latter half of the Permian of European Russia. Paleontological Journal 47:705-735
P7-26; P99; 99
Permocupedinae	Kaltanicupes kargalensis Ponomarenko, 1963	265.10000 to 259.90000 Ma
Amanak Formation, Kargala, Russian
A. G. Ponomarenko. 1963. Paleozoyskie zhuki Cupididea evropeyskoy chasti SSSR. Paleontologicheskii Zhurnal 1963(1):70-85
P7-27; P100; 100
Archostemata	Kargalarva permosialis Prokin et al, 2019	265.10000 to 259.90000 Ma
Amanak Formation, Kargala, Russian
A. A. Prokin, A. G. Ponomarenko, and A. G. Kirejtshuk. 2019. Description of a larva of Kargalarva permosialis gen. et sp. nov. (Coleoptera: Schizophoromorpha) from the Kargala fossil site. Paleontological Journal 53:282-286

## Sheet: Wuchiapingian
Number
Family(or Parent taxon)	Species	Time range
	Previous name
Stratigraphy information
Reference
P8-1; P101; 101
Permocupedinae	Protocupoides esini Ponomarenko, 2013	259.90000 to 254.17000 Ma
Poldarsa Formation, Isady Locality, Russian
A. G. Ponomarenko. 2013. New beetles (Insecta, Coleoptera) from the latter half of the Permian of European Russia. Paleontological Journal 47:705-735
P8-2; P102; 102
Taldycupedinae	Taldycupes cellulosus Ponomarenko, 2013	259.90000 to 254.17000 Ma
Poldarsa Formation, Isady Locality, Russian
A. G. Ponomarenko. 2013. New beetles (Insecta, Coleoptera) from the latter half of the Permian of European Russia. Paleontological Journal 47:705-735
P8-3; P103; 103
Taldycupedinae	Proterocupes permiana Ponomarenko, 2013	259.90000 to 254.17000 Ma
	Previous name: Simmondsia permiana
Poldarsa Formation, Isady Locality, Russian
A. G. Ponomarenko. 2013. New beetles (Insecta, Coleoptera) from the latter half of the Permian of European Russia. Paleontological Journal 47:705-735
P8-4; P104; 104
Asiocoleidae	Bicoleus laticella Ponomarenko, 2013	259.90000 to 254.17000 Ma
Poldarsa Formation, Isady Locality, Russian
A. G. Ponomarenko. 2013. New beetles (Insecta, Coleoptera) from the latter half of the Permian of European Russia. Paleontological Journal 47:705-735
P8-5; P105; 105
Asiocoleidae	Tetracoleus tricoleoides Ponomarenko, 2013	259.90000 to 254.17000 Ma
Poldarsa Formation, Isady Locality, Russian
A. G. Ponomarenko. 2013. New beetles (Insecta, Coleoptera) from the latter half of the Permian of European Russia. Paleontological Journal 47:705-735
P8-6; P106; 106
Rhombocoleidae	Karakanocoleus mutovinensis Ponomarenko, 2013	259.90000 to 254.17000 Ma
Poldarsa Formation, Isady Locality, Russian
A. G. Ponomarenko. 2013. New beetles (Insecta, Coleoptera) from the latter half of the Permian of European Russia. Paleontological Journal 47:705-735
P8-7; P107; 107
Rhombocoleidae	Erunakicupes grossus Ponomarenko, 2013	259.90000 to 254.17000 Ma
Poldarsa Formation, Isady Locality, Russian
A. G. Ponomarenko. 2013. New beetles (Insecta, Coleoptera) from the latter half of the Permian of European Russia. Paleontological Journal 47:705-735
P8-8; P108; 108
Schizocoleidae	Schizocoleus depressus Ponomarenko, 2013	259.90000 to 254.17000 Ma
Poldarsa Formation, Isady Locality, Russian
A. G. Ponomarenko. 2013. New beetles (Insecta, Coleoptera) from the latter half of the Permian of European Russia. Paleontological Journal 47:705-735
P8-9; P109; 109
Schizocoleidae	Uskatocoleus ponomarenkoi Ponomarenko, 2013	259.90000 to 254.17000 Ma
Poldarsa Formation, Isady Locality, Russian
A. G. Ponomarenko. 2013. New beetles (Insecta, Coleoptera) from the latter half of the Permian of European Russia. Paleontological Journal 47:705-735
P8-10; P110; 110
Schizocoleidae	Uskatocoleus sukhonensis Ponomarenko, 2013	259.90000 to 254.17000 Ma
Poldarsa Formation, Isady Locality, Russian
A. G. Ponomarenko. 2013. New beetles (Insecta, Coleoptera) from the latter half of the Permian of European Russia. Paleontological Journal 47:705-735
P8-11; P111; 111
Schizocoleidae	Uskatocoleus micron Ponomarenko, 2013	259.90000 to 254.17000 Ma
Poldarsa Formation, Isady Locality, Russian
A. G. Ponomarenko. 2013. New beetles (Insecta, Coleoptera) from the latter half of the Permian of European Russia. Paleontological Journal 47:705-735
P8-12; P112; 112
Schizocoleidae	Pseudochrysomelites longus Ponomarenko, 2013	259.90000 to 254.17000 Ma
Poldarsa Formation, Isady Locality, Russian
A. G. Ponomarenko. 2013. New beetles (Insecta, Coleoptera) from the latter half of the Permian of European Russia. Paleontological Journal 47:705-735
P8-13; P113; 113
Schizocoleidae	Pseudochrysomelites medialis Ponomarenko, 2013	259.90000 to 254.17000 Ma
Poldarsa Formation, Isady Locality, Russian
A. G. Ponomarenko. 2013. New beetles (Insecta, Coleoptera) from the latter half of the Permian of European Russia. Paleontological Journal 47:705-735
P8-14; P114; 114
Schizocoleidae	Pseudochrysomelites sphenoidalis Ponomarenko, 2013	259.90000 to 254.17000 Ma
Poldarsa Formation, Isady Locality, Russian
A. G. Ponomarenko. 2013. New beetles (Insecta, Coleoptera) from the latter half of the Permian of European Russia. Paleontological Journal 47:705-735
P8-15; P115; 115
Schizocoleidae	Pseudochrysomelites bashkuevi Ponomarenko, 2013	259.90000 to 254.17000 Ma
Poldarsa Formation, Isady Locality, Russian
A. G. Ponomarenko. 2013. New beetles (Insecta, Coleoptera) from the latter half of the Permian of European Russia. Paleontological Journal 47:705-735
P8-16; P116; 116
Rhombocoleidae	Rossocoleus aristovi Ponomarenko, 2013	259.90000 to 254.17000 Ma
Poldarsa Formation, Isady Locality, Russian
A. G. Ponomarenko. 2013. New beetles (Insecta, Coleoptera) from the latter half of the Permian of European Russia. Paleontological Journal 47:705-735
P8-17; P117; 117
Schizocoleidae	Uskatocoleus uralensis Ponomarenko, 2013	259.90000 to 254.17000 Ma
Vyazovka Formation, Babintsevo, Russian
A. G. Ponomarenko. 2013. New beetles (Insecta, Coleoptera) from the latter half of the Permian of European Russia. Paleontological Journal 47:705-735
P8-18; P118; 118
Permocupedinae	Ichthyocupes skoki Rohdendorf, 1961	259.90000 to 254.17000 Ma
	Previous name: Permocupoides skoki Rohdendorf, 1961
(1) Gramoteinskaya Formation, Tykhta River, ditch 34, Kutsnetsk Basin, Russian
(2) Sokolova II, Gramoteinskaya Formation, Russian
B. B. Rohdendorf. 1961. Superorder Coleopteroidea, in Paleozoiskie nasekomye kuznetskogo basseina. Akademiya Nauk SSSR, Trudy Paleontologicheskogo Instituta 85:393-469
P8-19; P119; 119
Taldycupedinae	Tychticupes beljanini Rohdendorf, 1961	259.90000 to 254.17000 Ma
	Previous name: Taldycupes beljanini Rohdendorf, 1961
Gramoteinskaya Formation, Tykhta River, ditch 34, Kutsnetsk Basin, Russian
B. B. Rohdendorf. 1961. Superorder Coleopteroidea, in Paleozoiskie nasekomye kuznetskogo basseina. Akademiya Nauk SSSR, Trudy Paleontologicheskogo Instituta 85:393-469
P8-20; P120; 120
Taldycupedinae	Taldycupes khalfini Rohdendorf, 1961	259.90000 to 254.17000 Ma
Gramoteinskaya Formation, Tykhta River, ditch 34, Kutsnetsk Basin, Russian
B. B. Rohdendorf. 1961. Superorder Coleopteroidea, in Paleozoiskie nasekomye kuznetskogo basseina. Akademiya Nauk SSSR, Trudy Paleontologicheskogo Instituta 85:393-469
P8-21; P121; 121
Taldycupedinae	Tychticupes ragozini Rohdendorf, 1961	259.90000 to 254.17000 Ma
	Previous name: Simmondsia ragosini Rohdendorf, 1961
Gramoteinskaya Formation, Tykhta River, ditch 34, Kutsnetsk Basin, Russian
B. B. Rohdendorf. 1961. Superorder Coleopteroidea, in Paleozoiskie nasekomye kuznetskogo basseina. Akademiya Nauk SSSR, Trudy Paleontologicheskogo Instituta 85:393-469
P8-22; P122; 122
Taldycupedinae	Tychticupes radtshenkoi Rohdendorf, 1961	259.90000 to 254.17000 Ma
Gramoteinskaya Formation, Tykhta River, ditch 34, Kutsnetsk Basin, Russian
B. B. Rohdendorf. 1961. Superorder Coleopteroidea, in Paleozoiskie nasekomye kuznetskogo basseina. Akademiya Nauk SSSR, Trudy Paleontologicheskogo Instituta 85:393-469
P8-23; P123; 123
Schizocoleidae	Uskatocoleus zalesskyi Rohdendorf, 1961	259.90000 to 254.17000 Ma
Gramoteinskaya Formation, ykhta River, ditch 34, Kutsnetsk Basin, Russian
B. B. Rohdendorf. 1961. Superorder Coleopteroidea, in Paleozoiskie nasekomye kuznetskogo basseina. Akademiya Nauk SSSR, Trudy Paleontologicheskogo Instituta 85:393-469
P8-24; P124; 124
Permosynidae	Tychtocoleus neuburgae Rohdendorf, 1961	259.90000 to 254.17000 Ma
(1) Gramoteinskaya Formation, Tykhta River, ditch 34, Kutsnetsk Basin, Russian
(2) Gramoteinskaya Formation, Sokolova II, Russian
B. B. Rohdendorf. 1961. Superorder Coleopteroidea, in Paleozoiskie nasekomye kuznetskogo basseina. Akademiya Nauk SSSR, Trudy Paleontologicheskogo Instituta 85:393-469
P8-25; P125; 125
Permocupedinae	Protocupoides carinatus Rohdendorf, 1961	259.90000 to 254.17000 Ma
	Previous name: Tomiocupes carinatus Rohdendorf, 1961
Gramoteinskaya Formation, Sokolova II, Russian
B. B. Rohdendorf. 1961. Superorder Coleopteroidea, in Paleozoiskie nasekomye kuznetskogo basseina. Akademiya Nauk SSSR, Trudy Paleontologicheskogo Instituta 85:393-469
P8-26; P126; 126
Permocupedinae	Protocupoides acer Rohdendorf, 1961	259.90000 to 254.17000 Ma
	Previous name: Tricupes acer Rohdendorf, 1961
Gramoteinskaya Formation, Sokolova II, Russian
B. B. Rohdendorf. 1961. Superorder Coleopteroidea, in Paleozoiskie nasekomye kuznetskogo basseina. Akademiya Nauk SSSR, Trudy Paleontologicheskogo Instituta 85:393-469
P8-27; P127; 127
Taldycupedinae	Taldycupes moltshanovi Rohdendorf, 1961	259.90000 to 254.17000 Ma
Gramoteinskaya Formation, Sokolova II, Russian
B. B. Rohdendorf. 1961. Superorder Coleopteroidea, in Paleozoiskie nasekomye kuznetskogo basseina. Akademiya Nauk SSSR, Trudy Paleontologicheskogo Instituta 85:393-469
P8-28; P128; 128
Taldycupedinae	Taldycupes bergi Rohdendorf, 1961	259.90000 to 254.17000 Ma
	Previous name: Taldycupidium bergi Rohdendorf, 1961
Gramoteinskaya Formation, Sokolova II, Russian
B. B. Rohdendorf. 1961. Superorder Coleopteroidea, in Paleozoiskie nasekomye kuznetskogo basseina. Akademiya Nauk SSSR, Trudy Paleontologicheskogo Instituta 85:393-469
P8-29; P129; 129
Taldycupedinae	Taldycupes vasjuchitshevi Rohdendorf, 1961	259.90000 to 254.17000 Ma
	Previous name: Tychticupes vasjuchitshevi Rohdendorf, 1961
Gramoteinskaya Formation, Sokolova II, Russian
B. B. Rohdendorf. 1961. Superorder Coleopteroidea, in Paleozoiskie nasekomye kuznetskogo basseina. Akademiya Nauk SSSR, Trudy Paleontologicheskogo Instituta 85:393-469
P8-30; P130; 130
Taldycupedinae	Tychticupoides grjazevi Rohdendorf, 1961	259.90000 to 254.17000 Ma
	Previous name: Tychticupoides grjasevi Rohdendorf, 1961
Gramoteinskaya Formation, Sokolova II, Russian
B. B. Rohdendorf. 1961. Superorder Coleopteroidea, in Paleozoiskie nasekomye kuznetskogo basseina. Akademiya Nauk SSSR, Trudy Paleontologicheskogo Instituta 85:393-469
P8-31; P131; 131
Rhombocoleidae	Rhombocoleus andreae Rohdendorf, 1961	259.90000 to 254.17000 Ma
Gramoteinskaya Formation, Sokolova II, Russian
B. B. Rohdendorf. 1961. Superorder Coleopteroidea, in Paleozoiskie nasekomye kuznetskogo basseina. Akademiya Nauk SSSR, Trudy Paleontologicheskogo Instituta 85:393-469
P8-32; P132; 132
Rhombocoleidae	Erunakicupes kryshtofovichi Rohdendorf, 1961	259.90000 to 254.17000 Ma
Gramoteinskaya Formation, Sokolova II, Russian
B. B. Rohdendorf. 1961. Superorder Coleopteroidea, in Paleozoiskie nasekomye kuznetskogo basseina. Akademiya Nauk SSSR, Trudy Paleontologicheskogo Instituta 85:393-469
P8-33; P133; 133
Rhombocoleidae	Erunakicupes fomitshevi Rohdendorf, 1961	259.90000 to 254.17000 Ma
Gramoteinskaya Formation, Sokolova II, Russian
B. B. Rohdendorf. 1961. Superorder Coleopteroidea, in Paleozoiskie nasekomye kuznetskogo basseina. Akademiya Nauk SSSR, Trudy Paleontologicheskogo Instituta 85:393-469
P8-34; P134; 134
Rhombocoleidae	Erunakicupes schmalhauseni Rohdendorf, 1961	259.90000 to 254.17000 Ma
Gramoteinskaya Formation, Sokolova II, Russian
B. B. Rohdendorf. 1961. Superorder Coleopteroidea, in Paleozoiskie nasekomye kuznetskogo basseina. Akademiya Nauk SSSR, Trudy Paleontologicheskogo Instituta 85:393-469
P8-35; P135; 135
Rhombocoleidae	Karakanocoleus venjukovi Rohdendorf, 1961	259.90000 to 254.17000 Ma
	Previous name: Erunakicupes venjukovi Rohdendorf, 1961
Gramoteinskaya Formation, Sokolova II, Russian
B. B. Rohdendorf. 1961. Superorder Coleopteroidea, in Paleozoiskie nasekomye kuznetskogo basseina. Akademiya Nauk SSSR, Trudy Paleontologicheskogo Instituta 85:393-469
P8-36; P136; 136
Rhombocoleidae	Aenigmocoleus borissiaki Rohdendorf, 1961	259.90000 to 254.17000 Ma
Gramoteinskaya Formation, Sokolova II, Russian
B. B. Rohdendorf. 1961. Superorder Coleopteroidea, in Paleozoiskie nasekomye kuznetskogo basseina. Akademiya Nauk SSSR, Trudy Paleontologicheskogo Instituta 85:393-469
P8-37; P137; 137
Schizocoleidae	Uskatocoleus foveolatus Rohdendorf, 1961	259.90000 to 254.17000 Ma
Gramoteinskaya Formation, Sokolova II, Russian
B. B. Rohdendorf. 1961. Superorder Coleopteroidea, in Paleozoiskie nasekomye kuznetskogo basseina. Akademiya Nauk SSSR, Trudy Paleontologicheskogo Instituta 85:393-469
P8-38; P138; 138
Schizocoleidae	Uskatocoleus lutugini Rohdendorf, 1961	259.90000 to 254.17000 Ma
Gramoteinskaya Formation, Sokolova II, Russian
B. B. Rohdendorf. 1961. Superorder Coleopteroidea, in Paleozoiskie nasekomye kuznetskogo basseina. Akademiya Nauk SSSR, Trudy Paleontologicheskogo Instituta 85:393-469
P8-39; P139; 139
Schizocoleidae	Metrorhynchites angustior Rohdendorf, 1961	259.90000 to 254.17000 Ma
	Previous name: Uskatocoleus angustior Rohdendorf, 1961
Gramoteinskaya Formatio, Sokolova II, Russian
B. B. Rohdendorf. 1961. Superorder Coleopteroidea, in Paleozoiskie nasekomye kuznetskogo basseina. Akademiya Nauk SSSR, Trudy Paleontologicheskogo Instituta 85:393-469
P8-40; P140; 140
Schizocoleidae	Metrorhynchites angustus Rohdendorf, 1961	259.90000 to 254.17000 Ma
	Previous name: Uskatocoleus angustus Rohdendorf, 1961
Gramoteinskaya Formation, Sokolova II, Russian
B. B. Rohdendorf. 1961. Superorder Coleopteroidea, in Paleozoiskie nasekomye kuznetskogo basseina. Akademiya Nauk SSSR, Trudy Paleontologicheskogo Instituta 85:393-469
P8-41; P141; 141
Schizocoleidae	Metrorhynchites longus Rohdendorf, 1961	259.90000 to 254.17000 Ma
	Previous name: Uskatocoleus longus Rohdendorf, 1961
Gramoteinskaya Formation, Sokolova II, Russian
B. B. Rohdendorf. 1961. Superorder Coleopteroidea, in Paleozoiskie nasekomye kuznetskogo basseina. Akademiya Nauk SSSR, Trudy Paleontologicheskogo Instituta 85:393-469
P8-42; P142; 142
Schizocoleidae	Uskatocoleus minimus Rohdendorf, 1961	259.90000 to 254.17000 Ma
Gramoteinskaya Formation, Sokolova II, Russian
B. B. Rohdendorf. 1961. Superorder Coleopteroidea, in Paleozoiskie nasekomye kuznetskogo basseina. Akademiya Nauk SSSR, Trudy Paleontologicheskogo Instituta 85:393-469
P8-43; P143; 143
Rhombocoleidae	Karakanocoleus major Rohdendorf, 1961	259.90000 to 254.17000 Ma
Gramoteinskaya Formation, Sokolova II, Russian
B. B. Rohdendorf. 1961. Superorder Coleopteroidea, in Paleozoiskie nasekomye kuznetskogo basseina. Akademiya Nauk SSSR, Trudy Paleontologicheskogo Instituta 85:393-469
P8-44; P144; 144
Rhombocoleidae	Karakanocoleus striatus Rohdendorf, 1961	259.90000 to 254.17000 Ma
Gramoteinskaya Formation, Sokolova II, Russian
B. B. Rohdendorf. 1961. Superorder Coleopteroidea, in Paleozoiskie nasekomye kuznetskogo basseina. Akademiya Nauk SSSR, Trudy Paleontologicheskogo Instituta 85:393-469
P8-45; P145; 145
Rhombocoleidae	Karakanocoleus magnus Rohdendorf, 1961	259.90000 to 254.17000 Ma
Gramoteinskaya Formation, Sokolova II, Russian
B. B. Rohdendorf. 1961. Superorder Coleopteroidea, in Paleozoiskie nasekomye kuznetskogo basseina. Akademiya Nauk SSSR, Trudy Paleontologicheskogo Instituta 85:393-469
P8-46; P146; 146
Ademosynidae	Ademosyne sibirica Rohdendorf, 1961	259.90000 to 254.17000 Ma
Gramoteinskaya Formation, Sokolova II, Russian
B. B. Rohdendorf. 1961. Superorder Coleopteroidea, in Paleozoiskie nasekomye kuznetskogo basseina. Akademiya Nauk SSSR, Trudy Paleontologicheskogo Instituta 85:393-469
P8-47; P147; 147
Polyphaga	Polysitum kuznetskiense Rohdendorf, 1961	259.90000 to 254.17000 Ma
Gramoteinskaya Formation, Sokolova II, Russian
B. B. Rohdendorf. 1961. Superorder Coleopteroidea, in Paleozoiskie nasekomye kuznetskogo basseina. Akademiya Nauk SSSR, Trudy Paleontologicheskogo Instituta 85:393-469

## Sheet: Changhsingian
Number
Family(or Parent taxon)	Species	Time range
	Previous name
Stratigraphy information
Reference
P9-1; P148; 148
Taldycupedinae	Afrotaldycupes africanus Ponomarenko, 2005	254.17000 to 252.17000 Ma
	Previous name: Taldycupes africanus Ponomarenko, 2005
Estcourt Formation, Balgowan, South Africa
A. G. Ponomarenko. 2005. Taxonomy, in New beetles (Insecta: Coleoptera) from the Late Permian of South Africa. African Invertebrates 46:253-260
P9-2; P149; 149
Schizocoleidae	Palademosyne natalensis Ponomarenko, 2005	254.17000 to 252.17000 Ma
Estcourt Formation, Balgowan, South Africa
A. G. Ponomarenko. 2005. Taxonomy, in New beetles (Insecta: Coleoptera) from the Late Permian of South Africa. African Invertebrates 46:253-260
P9-3; P150; 150
Permosynidae	Permosyne elongata Ponomarenko, 2005	254.17000 to 252.17000 Ma
Estcourt Formation, Balgowan, South Africa
A. G. Ponomarenko. 2005. Taxonomy, in New beetles (Insecta: Coleoptera) from the Late Permian of South Africa. African Invertebrates 46:253-260
P9-4; P151; 151
Taldycupedinae	Afrotaldycupes lidgettoniensis Ponomarenko, 2005	254.17000 to 252.17000 Ma
Estcourt Formation, Lidgetton, South Africa
A. G. Ponomarenko. 2005. Taxonomy, in New beetles (Insecta: Coleoptera) from the Late Permian of South Africa. African Invertebrates 46:253-260
P9-5; P152; 152
Rhombocoleidae	Rhombocoleites danutae Ponomarenko and Mostovski, 2005	254.17000 to 252.17000 Ma
Estcourt Formation, Lidgetton, South Africa
A. G. Ponomarenko. 2005. Taxonomy, in New beetles (Insecta: Coleoptera) from the Late Permian of South Africa. African Invertebrates 46:253-260
P9-6; P153; 153
Trachypachidae	Petrodromeus asiaticus Martynov, 1936	254.17000 to 252.17000 Ma
	Previous name: Ademosynoides asiaticus Martynov, 1936
Mal'tseva Formation; Kemerovo, Russian
A. V. Martynov. 1936. On some new materials of Arthropoda from Kuznetsk-Basin. Izvestiya Akademii Nauk SSSR: Seriya Biologicheskaya 6:1251-1264
P9-7; P154; 154
Ponomarenkiidae	Ponomarenkium belmonthense Yan et al, 2017	254.17000 to 252.17000 Ma
	Previous name: Ponomarenkia belmonthensis Yan et al. 2017
Croudace Bay Formation, Warner's Bay, Belmont, Australia
E. V. Yan, J. F. Lawrence, R. Beattie and R. G. Beutel. 2017. At the dawn of the great rise: †Ponomarenkia belmonthensis (Insecta: Coleoptera), a remarkable new Late Permian beetle from the Southern Hemisphere. Journal of Systematic Palaeontology 16:611-619
P9-8; P155; 155
Schizocoleidae	Pseudochrysomelites latum Ponomarenko, 2004	254.17000 to 252.17000 Ma
	Previous name: Palademosyne latum Ponomarenko, 2004
Vokhma Formation, Nedubrovo, Russian
A. G. Ponomarenko. 2004. Beetles (Insecta, Coleoptera) of the Late Permian and Early Triassic. Paleontological Journal 38(Suppl 2):S185-S196
P9-9; P156; 156
Triaplidae	Tunguskagyrus planus Yan et al, 2018	254.17000 to 252.17000 Ma
Chichikan Formation, Anakit-3, Russian
E. V. Yan, R. G. Beutel, and J. F. Lawrence. 2018. Whirling in the late Permian: ancestral Gyrinidae show early radiation of beetles before Permian-Triassic mass extinction. BMC Evolutionary Biology 18(33):1-10
P9-10; P157; 157
Triaplidae	Tunguskagyrus sibiricus Volkov, 2013	254.17000 to 252.17000 Ma
	Previous name: Triaplus sibiricus Volkov, 2013
Mal'tseva Formation, Babii Kamen', Russian
A. N. Volkov. 2013. New species of Triaplidae from the Babii Kamen’ locality (Kuznetsk Basin). Paleontological Journal 47:94-97
P9-11; P158; 158
Micromalthidae	Archaeomalthus synoriakos Yan et al, 2020	254.17000 to 252.17000 Ma
Mal'tseva Formation, Babii Kamen', Russian
E. V. Yan, R. G. Beutel, J. F. Lawrence, M. I. Yavorskaya, T. Hörnschemeyer, H. Pohl, D. V. Vassilenko, A. S. Bashkuev, and A. G. Ponomarenko. 2020. Archaeomalthus-(Coleoptera, Archostemata) a 'ghost adult' of Micromalthidae from Upper Permian deposits of Siberia?. Historical Biology 32:1019-1027
P9-12; P159; 159
Permosynidae	Artematopodites lozowskii Ponomarenko, 2015	254.17000 to 252.17000 Ma
Vokhma Formation, Nedubrovo, Russian
A. G. Ponomarenko. 2015. New beetles (Insecta, Coleoptera) from the Nedubrovo locality, terminal Permian or basal Triassic of European Russia. Paleontological Journal 49:39-50
P9-13; P160; 160
Permosynidae	Dinoharpalus latus Ponomarenko, 2015	254.17000 to 252.17000 Ma
Vokhma Formation, Nedubrovo, Russian
A. G. Ponomarenko. 2015. New beetles (Insecta, Coleoptera) from the Nedubrovo locality, terminal Permian or basal Triassic of European Russia. Paleontological Journal 49:39-50
P9-14; P161; 161
Permosynidae	Dinoharpalus martynovi Ponomarenko, 2018	254.17000 to 252.17000 Ma
Salarevo Formation, Aristovo, Russian
A. G. Ponomarenko. 2018. New beetles (Insecta, Coleoptera) from the upper Vyatkian Aristovo locality, European Russia. Paleontological Journal 52:620-630
P9-15; P162; 162
Rhombocoleidae	Erunakicupes angustus Ponomarenko, 2011	254.17000 to 252.17000 Ma
Vyazniki Formation, Balymotikha, Vyazniki, Russian
A. G. Ponomarenko. 2011. New beetles (Insecta, Coleoptera) from Vyazniki Locality, terminal Permian of European Russia. Paleontological Journal 45(4):414-422
P9-16; P163; 163
Asiocoleidae	Gondvanocoleus chikatunovi Ponomarenko et al. 2020	254.17000 to 252.17000 Ma
Croudace Bay Formation, Pincombe's Outcrop, Site 205, Violet Town Road, Belmont, Australia
A. G. Ponomarenko, E. V. Yan, O. D. Strelnikova and R. G. Beattie. 2020. The first finding of an asiocoleid beetle (Coleoptera: Asiocoleidae) in the Upper Permian Belmont Insect Beds, Australia, with descriptions of a new genus and species. Israel Journal of Entomology 50:1-9
P9-17; P164; 164
Permosynidae	Hydrobiites permianus Ponomarenko, 2018	254.17000 to 252.17000 Ma
Salarevo Formation, Aristovo, Russian
A. G. Ponomarenko. 2018. New beetles (Insecta, Coleoptera) from the upper Vyatkian Aristovo locality, European Russia. Paleontological Journal 52:620-630
P9-18; P165; 165
Permosynidae	Hydrobiites tillyardi Ponomarenko, 2011	254.17000 to 252.17000 Ma
(1) Upper Vyatkian, Vladimir, Russian
(2) Vyazniki Formation, Vladimir, Russian
A. G. Ponomarenko. 2011. New beetles (Insecta, Coleoptera) from Vyazniki Locality, terminal Permian of European Russia. Paleontological Journal 45(4):414-422
P9-19; P166; 166
Permosynidae	Hydrobiites vladimiri Ponomarenko, 2011	254.17000 to 252.17000 Ma
Vyazniki Formation, Balymotikha, Vyazniki, Russian
A. G. Ponomarenko. 2011. New beetles (Insecta, Coleoptera) from Vyazniki Locality, terminal Permian of European Russia. Paleontological Journal 45(4):414-422
P9-20; P167; 167
Rhombocoleidae	Karakanocoleus pincombeae Tillyard, 1924
	Previous name: Permosyne pincombeae Tillyard, 1924
Croudace Bay Formation, Belmont, Australia
R. J. Tillyard. 1924. Upper Permian Coleoptera and a new order from the Belmont Beds, New South Wales. Proceedings of the Linnean Society of New South Wales 49:429-435
P9-21; P168; 168
Schizocoleidae	Metrorhynchites baculum Ponomarenko, 2011	254.17000 to 252.17000 Ma
Vyazniki Formation, Balymotikha, Vyazniki, Russian
A. G. Ponomarenko. 2011. New beetles (Insecta, Coleoptera) from Vyazniki Locality, terminal Permian of European Russia. Paleontological Journal 45(4):414-422
P9-22; P169; 169
Schizocoleidae	Metrorhynchites elongatus Ponomarenko, 2011	254.17000 to 252.17000 Ma
Vyazniki Formation, Balymotikha, Vyazniki, Russian
A. G. Ponomarenko. 2011. New beetles (Insecta, Coleoptera) from Vyazniki Locality, terminal Permian of European Russia. Paleontological Journal 45(4):414-422
P9-23; P170; 170
Permosynidae	Permosyne affinis Tillyard, 1924	254.17000 to 252.17000 Ma
Croudace Bay Formation, Belmont, Australia
R. J. Tillyard. 1924. Upper Permian Coleoptera and a new order from the Belmont Beds, New South Wales. Proceedings of the Linnean Society of New South Wales 49:429-435
P9-24; P171; 171
Permosynidae	Permosyne belmontensis Tillyard, 1924	254.17000 to 252.17000 Ma
Croudace Bay Formation, Belmont, Australia
R. J. Tillyard. 1924. Upper Permian Coleoptera and a new order from the Belmont Beds, New South Wales. Proceedings of the Linnean Society of New South Wales 49:429-435
P9-25; P172; 172
Permosynidae	Permosyne dentata Ponomarenko, 2003	254.17000 to 252.17000 Ma
Salarevo Formation, Aristovo, Russian
A. G. Ponomarenko. 2003. The first beetles (Permosynidae, Coleoptera) from the upper Tatarian of European Russia. Paleontological Journal 37:170-173
P9-26; P173; 173
Permosynidae	Permosyne mitchelli Tillyard, 1924	254.17000 to 252.17000 Ma
Croudace Bay Formation, Belmont, Australia
R. J. Tillyard. 1924. Upper Permian Coleoptera and a new order from the Belmont Beds, New South Wales. Proceedings of the Linnean Society of New South Wales 49:429-435
P9-27; P174; 174
Permosynidae	Permosyne rasnitsyni Ponomarenko, 2011	254.17000 to 252.17000 Ma
Vyazniki Formation, Balymotikha, Vyazniki, Russian
A. G. Ponomarenko. 2011. New beetles (Insecta, Coleoptera) from Vyazniki Locality, terminal Permian of European Russia. Paleontological Journal 45(4):414-422
P9-28; P175; 175
Trachypachidae	Permunda nana Ponomarenko and Volkov, 2013	254.17000 to 252.17000 Ma
Mal'tseva Formation, Babii Kamen', Russian
A. G. Ponomarenko and A. N. Volkov. 2013. Ademosynoides asiaticus Martynov, 1936, the earliest known member of an extant beetle family (Insecta, Coleoptera, Trachypachidae). Paleontological Journal 47:601-606
P9-29; P176; 176
Trachypachidae	Petrodromeus minor Ponomarenko and Volkov, 2013	254.17000 to 252.17000 Ma
Mal'tseva Formation, Babii Kamen', Russian
A. G. Ponomarenko and A. N. Volkov. 2013. Ademosynoides asiaticus Martynov, 1936, the earliest known member of an extant beetle family (Insecta, Coleoptera, Trachypachidae). Paleontological Journal 47:601-606
P9-30; P177; 177
Taldycupedinae	Proterocupes major Ponomarenko, 2015	254.17000 to 252.17000 Ma
Vokhma Formation, Nedubrovo, Russian
A. G. Ponomarenko. 2015. New beetles (Insecta, Coleoptera) from the Nedubrovo locality, terminal Permian or basal Triassic of European Russia. Paleontological Journal 49:39-50
P9-31; P178; 178
Taldycupedinae	Proterocupes nedubrovensis Ponomarenko, 2015	254.17000 to 252.17000 Ma
Vokhma Formation, Nedubrovo, Russian
A. G. Ponomarenko. 2015. New beetles (Insecta, Coleoptera) from the Nedubrovo locality, terminal Permian or basal Triassic of European Russia. Paleontological Journal 49:39-50
P9-32; P179; 179
Schizocoleidae	Pseudochrysomelites circumflexus Ponomarenko, 2015	254.17000 to 252.17000 Ma
Vokhma Formation, Nedubrovo, Russian
A. G. Ponomarenko. 2015. New beetles (Insecta, Coleoptera) from the Nedubrovo locality, terminal Permian or basal Triassic of European Russia. Paleontological Journal 49:39-50
P9-33; P180; 180
Schizocoleidae	Pseudochrysomelites convexus Ponomarenko, 2015	254.17000 to 252.17000 Ma
Vokhma Formation, Nedubrovo, Russian
A. G. Ponomarenko. 2015. New beetles (Insecta, Coleoptera) from the Nedubrovo locality, terminal Permian or basal Triassic of European Russia. Paleontological Journal 49:39-50
P9-34; P181; 181
Schizocoleidae	Pseudochrysomelites dvinensis Ponomarenko, 2018	254.17000 to 252.17000 Ma
Salarevo Formation, Aristovo, Russian
A. G. Ponomarenko. 2018. New beetles (Insecta, Coleoptera) from the upper Vyatkian Aristovo locality, European Russia. Paleontological Journal 52:620-630
P9-35; P182; 182
Schizocoleidae	Pseudochrysomelites latissimus Ponomarenko, 2015	254.17000 to 252.17000 Ma
Vokhma Formation, Nedubrovo, Russian
A. G. Ponomarenko. 2015. New beetles (Insecta, Coleoptera) from the Nedubrovo locality, terminal Permian or basal Triassic of European Russia. Paleontological Journal 49:39-50
P9-36; P183; 183
Schizocoleidae	Pseudochrysomelites major Ponomarenko, 2011	254.17000 to 252.17000 Ma
Vyazniki Formation, Balymotikha, Vyazniki, Russian
A. G. Ponomarenko. 2011. New beetles (Insecta, Coleoptera) from Vyazniki Locality, terminal Permian of European Russia. Paleontological Journal 45(4):414-422
P9-37; P184; 184
Taldycupedinae	Taldycupes reticulatus Ponomarenko, 1969	254.17000 to 252.17000 Ma
Akkolka Formation, Karaungir, Kazakhstan
A. G. Ponomarenko. 1969. Istoricheskoe Razvitie Zhestkokrylykh-Arkhostemat [Historical Development of the Archostomate Beetles]. Trudy Akademiya Nauk SSSR 125:1-240
P9-38; P185; 185
Asiocoleidae	Tetracoleus aristovi Ponomarenko, 2018	254.17000 to 252.17000 Ma
Salarevo Formation, Aristovo, Russian
A. G. Ponomarenko. 2018. New beetles (Insecta, Coleoptera) from the upper Vyatkian Aristovo locality, European Russia. Paleontological Journal 52:620-630
P9-39; P186; 186
Asiocoleidae	Tetracoleus golubevi Ponomarenko, 2015	254.17000 to 252.17000 Ma
Vokhma Formation, Nedubrovo, Russian
A. G. Ponomarenko. 2015. New beetles (Insecta, Coleoptera) from the Nedubrovo locality, terminal Permian or basal Triassic of European Russia. Paleontological Journal 49:39-50
P9-40; P187; 187
Asiocoleidae	Tetracoleus meyeni Ponomarenko, 2013	254.17000 to 252.17000 Ma
Salarevo Formation, Aristovo, Russian
A. G. Ponomarenko. 2013. New beetles (Insecta, Coleoptera) from the latter half of the Permian of European Russia. Paleontological Journal 47:705-735
P9-41; P188; 188
Asiocoleidae	Tetracoleus sennikovi Ponomarenko, 2011	254.17000 to 252.17000 Ma
Vladimir, Russian
A. G. Ponomarenko. 2011. New beetles (Insecta, Coleoptera) from Vyazniki Locality, terminal Permian of European Russia. Paleontological Journal 45(4):414-422
P9-42; P189; 189
Asiocoleidae	Tetracoleus vasilenkoi Ponomarenko, 2018	254.17000 to 252.17000 Ma
Salarevo Formation, Aristovo, Russian
A. G. Ponomarenko. 2018. New beetles (Insecta, Coleoptera) from the upper Vyatkian Aristovo locality, European Russia. Paleontological Journal 52:620-630
P9-43; P190; 190
Permosynidae	Tychtocoleus europeus Ponomarenko, 2003	254.17000 to 252.17000 Ma
	Previous name: Permosyne europaea Ponomarenko, 2003
Salarevo Formation, Aristovo, Russian
A. G. Ponomarenko. 2003. The first beetles (Permosynidae, Coleoptera) from the upper Tatarian of European Russia. Paleontological Journal 37:170-173
P9-44; P191; 191
Permosynidae	Tychtocoleus popovi Ponomarenko, 2018	254.17000 to 252.17000 Ma
Salarevo Formation, Aristovo, Russian
A. G. Ponomarenko. 2018. New beetles (Insecta, Coleoptera) from the upper Vyatkian Aristovo locality, European Russia. Paleontological Journal 52:620-630
P9-45; P192; 192
Schizocoleidae	Uskatocoleus artus Ponomarenko, 2015	254.17000 to 252.17000 Ma
Vokhma Formation, Nedubrovo, Russian
A. G. Ponomarenko. 2015. New beetles (Insecta, Coleoptera) from the Nedubrovo locality, terminal Permian or basal Triassic of European Russia. Paleontological Journal 49:39-50
P9-46; P193; 193
Schizocoleidae	Uskatocoleus eurypygus Ponomarenko, 2011	254.17000 to 252.17000 Ma
Vyazniki Formation, Balymotikha, Vyazniki, Russian
A. G. Ponomarenko. 2011. New beetles (Insecta, Coleoptera) from Vyazniki Locality, terminal Permian of European Russia. Paleontological Journal 45(4):414-422
P9-47; P194; 194
Schizocoleidae	Uskatocoleus hirsutus Ponomarenko, 2015	254.17000 to 252.17000 Ma
Vokhma Formation, Nedubrovo, Russian
A. G. Ponomarenko. 2015. New beetles (Insecta, Coleoptera) from the Nedubrovo locality, terminal Permian or basal Triassic of European Russia. Paleontological Journal 49:39-50
P9-48; P195; 195
Schizocoleidae	Uskatocoleus minor Ponomarenko, 2015	254.17000 to 252.17000 Ma
Vokhma Formation, Nedubrovo, Russian
A. G. Ponomarenko. 2015. New beetles (Insecta, Coleoptera) from the Nedubrovo locality, terminal Permian or basal Triassic of European Russia. Paleontological Journal 49:39-50
P9-49; P196; 196
Schizocoleidae	Uskatocoleus rhynchophorus Ponomarenko, 2011	254.17000 to 252.17000 Ma
Vyazniki Formation, Balymotikha, Vyazniki, Russian
A. G. Ponomarenko. 2011. New beetles (Insecta, Coleoptera) from Vyazniki Locality, terminal Permian of European Russia. Paleontological Journal 45(4):414-422
P9-50; P197; 197
Taldycupedinae	Taldycupes rosanovi Ponomarenko, 2006	254.17000 to 251.30000 Ma
Limptekon Formation, Ilimpeya locality, Russian
A. G. Ponomarenko. 2006. A New Beetle Species of the Genus Taldycupes (Taldycupedidae, Coleoptera) from the Permian of the Tunguska River Basin. Paleontological Journal 40(3):295-296

## Sheet: Induan
Number
Family(or Parent taxon)	Species	Time range
	Previous name
Stratigraphy information
Reference
T1-1; T1; 198
Permosynidae	Pseudochrysomelites tumidus Ponomarenko, 2016	252.17000 to 251.30000 Ma
Vokhma Formation, Yontala, Yug River, Russian
A. G. Ponomarenko. 2016. New beetles (Insecta, Coleoptera) from the Lower Triassic of European Russia. Paleontological Journal 50:286-292

[truncated: 3 more sheets: Olenekian, Anisian, Ladinian]
