# Supplementary material for: Early evolution of beetles regulated by the end-Permian deforestation
Source: eLife. 2021 Nov 8;10:e72692. doi: 10.7554/eLife.72692 (PMC8585485; doi:10.7554/eLife.72692)
Supplement: Figure 3—source data 1. [file elife-72692-fig3-data1.xlsx]

## Sheet: Sheet1
	Char1	Char2	Char3	Char4	Char5	Char6	Char7	Char8	Char9	Char10	Char11	Char12	Char13	Char14	Char15	Char16	Char17	Char18	Char19	Char20	Char21	Char22	Char23	Char24	Char25	Char26	Char27	Char28	Char29	Char30	Char31	Char32	Char33	Char34	Char35	Char36	Char37	Char38	Char39	Char40	Char41	Char42	Char43	Char44	Char45	Char46	Char47	Char48	Char49
Sialis	0	0	0	1	0	0	0	0	0	0	0	0	0	0	0	0	0	0	0	0	1	0	0	1	0	-	0	0	0	0	0	0	0	0	0	0	0	0	0	0	?	0	0	0	0	-	0	0	0
Chauliodes	0	0	0	0	0	0	0	0	0	0	2	0	0	0	0	0	0	0	0	0	1	0	1	1	0	-	0	0	0	0	0	0	0	0	0	0	0	0	0	0	0	0	0	0	0	-	0	0	0
Trachypachus	1	0	0	1	0	0	0	0	0	0	0	0	0	0	0	0	0	1	1	1	0	1	0	1	0	-	0	0	0	0	0	1	1	0	0	0	0	2	0	0	1	1	0	0	1	0	0	0	2
Helophorus	1	0	0	1	0	0	0	0	0	0	0	0	0	0	0	0	0	0	1	0	0	1	0	1	0	-	0	0	0	0	0	1	1	0	0	0	0	0	0	0	1	2	1	0	1	0	0	0	0
Torridincola	1	0	0	1	0	0	0	0	0	0	2	-	0	0	0	0	0	?	1	1	0	1	0	?	0	-	0	0	?	2	0	-	-	-	0	0	0	2	0	0	1	1	1	0	1	1	0	1	0
Cupes	1	1	1	1	1	2	2	1	1	0	0	1	1	0	1	1	0	?	1	?	1	1	1	?	0	0	0	1	0	1	0	1	0	0	1	1	1	1	1	1	1	1	0	1	1	0	0	1	1
Omma	1	1	1	1	1	1	1	0	0	0	1	0	?	0	?	1	1	?	?	?	0	1	0	?	0	1	1	0	0	0	0	1	0	1	1	1	0	0	1	?	1	0	0	0	0	0	0	1	1
Tshekardocoleus	1	1	?	?	0	0	0	0	0	0	0	0	?	?	?	0	0	?	?	?	0	1	0	?	0	?	0	?	?	?	?	?	?	?	?	?	?	?	?	?	0	0	?	0	1	1	1	1	0
Permocupes	1	1	?	?	0	0	0	0	0	0	?	0	?	?	?	0	0	?	?	?	0	1	0	?	0	?	0	?	?	?	?	?	?	?	?	?	?	?	?	?	0	0	?	0	1	1	1	1	0
Taldycupes	1	1	?	?	0	0	0	0	0	0	?	0	?	?	?	0	0	?	?	?	0	1	0	?	0	?	0	?	?	?	?	?	?	?	?	?	?	?	?	?	0	0	?	0	1	1	1	1	0
Rhombocoleites	1	1	?	?	0	?	?	?	0	?	0	0	?	?	?	?	?	?	?	?	0	1	0	?	0	?	0	?	?	?	?	?	?	?	?	?	?	?	?	?	?	0	?	0	1	1	1	1	0
Chaocoleus	1	0	0	1	0	0	0	0	0	0	?	?	?	?	?	?	?	?	?	?	0	1	0	?	0	?	0	?	?	?	?	?	?	?	?	?	?	?	?	?	1	0	?	0	1	0	0	0	0
Dikerocoleus	1	0	0	?	0	0	?	?	0	0	0	0	?	?	?	?	?	?	?	?	0	1	0	?	1	?	0	?	?	?	?	?	?	?	?	?	?	?	?	?	1	0	?	0	1	0	0	1	0
Triadocupes	1	1	?	?	0	0	2	0	0	0	0	0	?	?	?	0	0	?	?	?	0	1	0	?	0	?	0	?	?	?	?	?	?	?	?	?	?	?	?	?	0	1	?	0	1	1	0	1	0
Triaplus	1	0	0	?	0	0	1	0	0	0	0	0	?	?	?	?	?	?	?	?	0	1	0	?	0	?	0	?	?	?	?	?	?	?	?	?	?	?	?	?	1	0	?	0	0	0	0	1	0
[truncated: 44 more columns]
