# Supplementary material for: Early evolution of beetles regulated by the end-Permian deforestation
Source: eLife. 2021 Nov 8;10:e72692. doi: 10.7554/eLife.72692 (PMC8585485; doi:10.7554/eLife.72692)
Supplement: Figure 4—source data 1. [file elife-72692-fig4-data1.xlsx]

## Sheet: genus level
Species	Reference	Group	Char1	Char2	Char3	Char4	Char5	Char6	Char7	Char8	Char9	Char10	Char11	Char12	Char13	Char14	Char15	Char16	Char17	Char18	Char19	Char20	Char21	Char22	Char23	Char24	Char25	Char26	Char27	Char28	Char29	Char30	Char31	Char32	Char33	Char34	Char35
Afrocupes firmae		1	0	1	1	0	2	1	0	2	1	2	2	3	1	3	1	1	0	1	?	0	2	2	?	1	0	1	0	3	0	0	0	1	?	2	1
Avocoleus fractus		1	0	0	1	0	2	1	0	0	1	2	2	3	1	3	0	0	0	1	0	0	2	2	0	1	1	0	0	1	2	0	0	1	0	2	1
Boscoleus blandus		1	0	0	1	0	2	1	0	0	1	2	2	3	1	3	0	0	0	?	0	0	2	2	0	1	1	0	0	1	2	0	0	1	0	2	1
Coleopsis archaica		1	0	?	1	0	2	1	0	1	1	2	2	3	1	3	?	0	0	1	0	0	2	2	?	1	1	0	0	?	2	?	0	1	?	2	1
Eocoleus scaber		1	0	0	1	0	2	1	0	0	1	2	2	3	1	3	0	0	0	1	0	0	2	2	0	1	1	0	0	1	2	0	0	1	0	2	1
Liberocoleus intactus		1	?	1	1	0	2	1	0	0	1	2	2	3	1	3	1	0	?	?	0	0	2	1	0	1	1	0	0	2	2	0	0	1	0	2	1
Maricoleus valentinae		1	0	0	1	0	2	1	0	0	1	2	2	3	1	3	0	0	0	1	0	0	2	1	?	1	1	0	?	0	2	?	0	1	0	2	1
Moravocoleus permianus		1	2	0	0	0	2	1	0	2	1	2	2	3	1	3	0	0	0	1	0	0	2	2	0	1	1	0	0	1	2	0	0	1	0	2	1
Oborocoleus rohdendorfi		1	2	1	1	0	2	1	0	2	1	2	2	3	1	3	1	0	?	1	0	0	2	0	0	1	1	0	0	?	2	0	0	1	0	2	1
Pachypleurites nodosus		1	1	?	1	0	2	1	0	3	1	2	2	3	?	3	?	0	?	1	?	0	2	0	0	1	?	?	?	?	?	?	0	1	?	2	1
Permocoleus wellingtonensis		1	?	0	1	0	2	1	0	1	1	2	2	3	1	3	1	0	0	0	0	0	2	2	?	1	0	1	?	3	?	?	0	1	0	2	1
Pintolla ponomarenkoi		1	2	1	1	0	2	1	0	1	1	2	2	3	1	3	1	1	0	0	0	0	2	1	?	1	0	1	0	3	0	0	0	1	0	2	1
Prosperocoleus prosperus		1	?	0	1	0	2	1	0	2	1	2	2	3	1	3	0	0	?	?	0	0	2	2	0	1	1	0	0	1	2	0	0	1	0	2	1
Protocupoides rohdendorfi		1	0	1	?	0	2	1	0	1	1	2	2	3	1	3	1	0	0	1	?	0	2	?	?	1	0	1	0	3	?	0	0	1	?	2	1
Retelytron conopeum		1	?	0	1	0	2	1	0	2	1	2	2	3	1	3	0	0	?	?	0	0	2	2	?	1	1	0	0	1	2	?	0	1	0	2	1
Sylvacoleodes admirandus		1	2	0	1	0	2	1	0	2	1	2	2	3	1	3	2	0	1	1	?	0	2	2	?	1	1	0	1	1	2	2	0	1	0	2	1
Sylvacoleus richteri		1	2	0	1	0	2	1	0	2	1	2	2	3	1	3	0	0	1	1	0	0	2	2	0	1	1	0	0	1	2	0	0	1	0	2	1
Tshekardocoleidae indet. Kukalová No. 10/1968	J. Kukalová. 1968. On the systematic position of the supposed Permian beetles, Tschecardocoleidae, with a description of a new collection from Moravia. Sbornik geologickych ved, paleontologie 11:139-161	1	?	0	1	0	2	1	0	?	1	2	2	3	?	3	0	0	?	?	0	0	2	?	?	1	?	?	?	?	?	?	0	1	0	2	1
Tshekardocoleus minor		1	2	0	1	0	2	1	0	1	1	2	2	3	1	3	0	0	1	1	0	0	2	0	?	1	1	0	0	1	2	?	0	1	0	2	1
Umoricoleus perplex		1	?	0	1	0	2	1	0	?	1	2	2	3	?	3	0	0	?	?	0	0	2	2	0	1	?	?	0	?	?	0	0	1	0	2	1
Uralocoleus splendens		1	?	?	1	0	2	1	0	?	1	2	2	3	1	3	?	0	0	1	?	0	2	1	0	1	1	0	?	?	2	?	0	1	?	2	1
Votocoleus submissus		1	0	0	0	0	2	1	0	0	1	2	2	3	1	3	1	0	0	1	0	0	2	1	0	1	1	0	0	0	2	0	0	1	0	2	1
Aenigmocoleus uralensis		2	0	2	2	0	2	0	?	?	1	2	2	1	?	?	3	2	2	1	2	0	2	?	0	1	?	?	0	?	?	1	0	1	2	2	1
Archicupes jacobsoni		2	0	0	1	0	2	1	0	1	1	2	2	3	1	3	0	0	0	0	0	0	2	2	0	1	1	0	0	0	2	0	0	1	0	2	1
Archosyne permiana		2	2	2	2	0	0	1	0	2	1	0	0	3	1	3	3	2	2	1	2	0	2	0	?	?	1	1	0	?	1	?	2	1	2	1	1
Asiocoleopsis hongi		2	0	0	1	0	2	1	0	1	1	2	2	3	1	3	0	0	0	1	0	0	2	0	0	1	1	0	0	1	2	?	0	1	0	2	1
Asiocoleus novojilovi		2	2	1	0	0	2	1	0	0	1	2	2	3	1	3	2	0	0	1	0	0	2	2	0	1	0	1	0	3	0	0	0	1	0	2	1
Bicoleus kuplensis		2	0	1	1	0	2	1	0	0	1	2	2	3	1	3	2	0	0	1	1	0	2	0	0	1	0	1	0	3	0	?	0	1	1	2	1
Chaocoleus limnebius		2	0	2	2	0	0	1	0	2	?	?	?	3	1	3	3	2	2	1	2	0	2	1	?	?	0	1	0	3	1	1	?	1	2	?	1
Cytocupes angustus		2	0	0	1	0	2	1	0	1	1	2	2	3	1	3	2	0	0	1	1	0	2	2	0	1	1	0	0	1	2	0	0	1	0	2	1
Cytocupoides elongatus		2	1	0	1	0	2	1	0	2	1	2	2	3	1	3	2	0	0	1	1	0	2	2	1	1	0	0	1	3	2	2	0	1	0	2	1
Dikerocoleus divisus		2	0	2	2	0	2	1	0	2	1	2	2	3	1	3	3	2	2	1	2	0	2	1	1	1	0	1	0	3	1	1	0	1	2	2	1
Elateridopsis permiensis		2	0	0	1	0	2	1	0	2	1	2	2	3	1	3	?	1	0	1	?	0	2	2	?	1	0	1	?	3	?	?	0	1	?	2	1
Eocupes lukjanovitshi		2	2	1	1	0	2	1	0	2	1	2	2	3	1	3	1	0	1	1	1	0	2	2	1	1	0	1	0	3	0	0	0	1	0	2	1
Erunakicupes obrutshevi		2	2	2	2	0	0	0	0	1	1	?	0	1	1	0	3	2	2	1	2	0	2	0	0	1	0	1	0	3	0	0	1	1	2	1	1
Ichthyocupes tyzhnovi		2	2	1	?	0	2	1	0	1	1	2	2	3	1	3	2	0	0	1	?	0	2	1	0	1	0	1	1	3	1	2	0	1	1	2	1
Kaltanicupes acutus		2	1	0	1	0	2	1	0	2	1	2	2	3	1	3	0	0	0	1	1	0	2	2	?	1	1	0	0	1	2	0	0	1	0	2	1
Kaltanocoleus pospelovi		2	0	0	1	0	2	1	0	1	1	2	2	3	1	3	1	0	0	0	0	0	2	2	?	1	0	1	1	3	0	2	0	1	?	2	1
Karakanocoleus europeus		2	0	2	2	0	0	0	0	2	?	?	0	1	1	0	3	2	2	1	2	0	2	1	?	?	0	1	0	3	?	?	?	1	2	1	1
Karakanocoleus janischewskyi		2	2	2	2	0	2	0	0	1	1	2	2	1	1	1	3	2	2	1	2	0	2	1	0	1	0	1	0	3	1	1	0	1	2	2	1
Linicupes yinpinensis		2	?	0	1	0	2	1	0	1	1	2	2	3	1	3	0	0	0	1	1	0	2	0	0	1	1	0	?	0	2	?	0	1	0	2	1
Palademosyne martynovae		2	0	2	2	0	2	1	0	1	1	2	2	3	1	3	3	2	2	1	2	0	2	0	0	1	1	0	0	2	2	1	0	1	2	2	1
Permocupes sojanensis		2	0	0	1	0	2	1	0	2	1	2	2	3	1	3	2	0	1	0	1	0	2	2	?	1	0	1	0	3	0	0	0	1	0	2	1
Protocupes martynovi		2	0	1	1	0	2	1	0	1	1	2	2	3	1	3	2	0	0	?	?	0	2	2	0	1	0	1	0	3	0	0	0	1	?	2	1
Protocupoides elongatus		2	2	0	1	0	2	1	0	3	1	2	2	3	1	3	0	0	1	0	1	0	2	2	?	1	0	1	0	3	0	?	0	1	0	2	1
Pseudochrysomelites ovum		2	0	2	2	0	2	1	0	1	1	2	2	3	1	3	3	2	2	1	2	0	2	0	0	1	0	1	0	3	?	?	0	1	2	2	1
Rhombocoleus gomankovi		2	?	2	2	0	2	0	3	?	1	2	2	?	1	2	3	2	2	?	2	0	2	2	?	?	0	1	0	3	?	?	0	1	2	2	1
Rossocoleus angustus		2	?	2	2	0	0	0	0	1	1	1	1	1	1	0	3	2	2	?	2	0	2	2	?	1	0	1	0	3	1	1	1	1	2	1	1
Rossocoleus grandis		2	0	2	2	0	2	0	0	2	1	2	2	1	1	0	3	2	2	1	2	2	0	1	0	1	0	1	0	3	0	0	0	1	2	2	1
Rossocoleus sakmara		2	0	2	2	2	2	0	0	2	1	2	2	1	1	0	3	2	2	1	2	0	2	1	?	1	0	1	0	3	?	1	0	1	2	2	1
Sakmaracoleus orenburgensis		2	0	2	2	0	0	1	0	?	0	1	0	3	1	3	3	2	2	1	2	0	2	?	1	1	?	?	0	?	?	1	2	1	2	0	1
Schizocoleus major		2	2	2	2	0	2	0	0	2	1	2	2	1	1	2	3	2	2	1	2	0	2	1	0	1	0	1	0	3	1	0	0	1	2	2	1
Schizophoridae indet. PIN, no. 3286/142	Aristov D S, Bashkuev A S, Golubev V K, et al. Fossil insects of the middle and upper Permian of European Russia[J]. Paleontological Journal, 2013, 47(7): 641-832.	2	2	2	2	0	2	1	0	1	1	2	2	3	1	3	3	2	2	1	2	0	2	1	?	?	0	1	?	3	?	?	0	1	2	2	1
Schizotaldycupes pubescens		2	2	1	1	0	2	0	0	2	1	2	2	1	1	0	1	0	1	1	1	0	2	1	0	1	0	1	0	3	1	0	0	1	0	2	1
Sojanocoleus reticulatus		2	?	0	1	0	2	1	0	1	1	2	2	3	1	3	0	0	?	?	0	0	2	1	?	1	1	0	1	?	2	2	0	1	0	2	1
Stegosyne rugosa		2	0	2	2	0	2	1	0	1	1	2	2	3	1	3	3	2	2	1	2	0	2	0	0	1	0	1	0	3	1	1	0	1	2	2	1
Taldycupes pingi		2	0	0	1	0	2	1	0	3	1	2	2	3	1	3	1	1	0	1	1	0	2	1	0	1	1	0	0	?	2	?	0	1	0	2	1
Tatarocupes granulatus		2	1	0	1	0	2	1	0	2	1	2	2	3	1	3	2	1	1	1	1	0	2	2	0	1	0	1	0	3	1	1	0	1	0	2	1
Tecticupes heckeri		2	0	0	1	0	2	1	0	3	1	2	2	3	1	3	1	1	0	1	1	0	2	1	0	1	0	1	1	3	?	2	0	1	0	2	1
Tetracoleus orenburgensis		2	0	0	?	0	2	1	0	?	1	2	2	3	1	3	2	0	?	?	?	0	2	?	0	1	0	1	0	3	1	?	0	1	0	2	1
Tychticupes ussovi		2	?	0	1	0	2	1	0	?	1	2	2	3	1	3	1	1	?	?	?	0	2	1	0	1	0	1	?	3	1	?	0	1	1	2	1
Uralocoleus ultimus		2	2	0	1	0	2	1	0	2	1	2	2	3	1	3	0	0	0	1	0	0	2	2	0	1	1	0	0	1	2	1	0	1	0	2	1
Uskaticupes javoskyi		2	1	0	1	0	2	1	0	3	1	2	2	3	1	3	1	1	0	1	1	0	2	1	1	1	0	1	0	3	?	?	0	1	1	2	1
Uskatocoleus avitus		2	1	2	2	0	0	0	0	1	1	1	1	1	1	1	3	2	2	1	2	0	2	0	0	0	0	0	0	3	2	1	1	1	2	1	1
Uskatocoleus kaltanicus		2	2	2	2	0	2	0	0	1	1	2	2	1	1	0	3	2	2	1	2	0	2	1	0	1	0	0	0	3	2	1	0	1	2	2	1
Permocrossos elongatus		2	1	2	2	0	0	1	0	2	0	1	1	3	1	3	3	2	2	1	2	0	2	0	1	1	1	0	0	?	2	?	1	1	2	1	1
Aenigmocoleus borissiaki		3	1	2	2	0	2	0	2	1	1	2	2	1	1	1	3	2	2	1	2	0	2	2	0	1	0	1	0	3	2	1	0	1	2	2	1
Ademosyne sibirica		3	1	2	2	0	0	1	0	1	0	1	0	3	1	3	3	2	2	1	2	0	2	0	1	0	0	1	0	3	1	1	1	1	2	1	1
Bicoleus laticella		3	0	0	1	0	2	1	0	2	1	2	2	3	1	3	0	0	1	1	1	0	2	0	0	1	1	0	0	0	2	?	0	1	0	2	1
Gondvanocoleus chikatunovi		3	1	0	1	0	2	1	0	2	1	2	2	3	1	3	1	0	1	1	1	0	2	1	0	1	1	0	0	2	2	1	0	1	0	2	1
Tetracoleus vasilenkoi		3	2	1	1	0	2	1	0	2	1	2	2	3	1	3	1	1	1	1	1	0	2	1	0	1	0	1	0	3	1	1	0	1	?	2	1
Ichthyocupes skoki		3	?	0	1	0	2	1	0	2	1	2	2	3	1	3	0	0	?	?	?	0	2	2	1	1	0	1	1	3	0	2	0	1	0	2	1
Protocupoides esini		3	0	0	1	0	2	1	0	3	1	2	2	3	1	3	0	0	1	1	1	0	2	1	?	1	1	0	0	1	2	?	0	1	0	2	1
Artematopodites lozowskii		3	2	2	2	0	1	1	0	1	1	1	1	3	1	3	3	2	2	1	2	0	2	0	1	1	1	0	1	?	2	2	1	1	2	1	1
Dinoharpalus martynovi		3	2	2	2	0	1	1	0	1	1	0	0	3	1	3	3	2	2	1	2	0	2	2	?	1	0	1	0	3	?	1	2	1	2	1	1
Hydrobiites vladimiri		3	2	2	2	0	0	1	0	1	0	1	0	3	1	3	3	2	2	1	2	0	2	0	1	1	1	0	0	?	2	?	1	1	2	1	1
Palademosyne natalensis		3	0	2	2	0	2	1	0	1	1	2	2	3	?	3	3	2	2	1	2	0	2	0	1	1	0	1	0	3	?	?	0	1	2	2	1
Permosyne dentata		3	0	2	2	0	0	1	0	1	0	1	0	3	0	3	3	2	2	1	2	0	2	0	0	1	1	0	0	2	2	1	2	1	2	1	1
Permosynidae indet. PIN, no. 3446/67	Ponomarenko A G. New Beetles (Insecta, Coleoptera) from the Upper Vyatkian Aristovo Locality, European Russia[J]. Paleontological Journal, 2018, 52(6): 620-630.	3	?	2	2	0	0	1	0	?	?	?	?	3	1	3	3	2	2	?	2	0	2	1	?	?	1	0	0	0	2	1	?	1	2	?	1
Tychtocoleus neuburgae		3	2	2	2	0	0	1	0	1	1	1	1	3	1	3	3	2	2	1	2	0	2	1	0	1	0	1	0	3	1	1	1	1	2	1	1
Polysitum kuznetskiense		3	0	2	2	0	0	0	0	1	1	?	1	1	1	1	3	2	2	1	2	0	2	0	0	1	0	1	0	3	0	1	1	1	2	1	1
Ponomarenkium belmonthense		3	2	2	2	0	0	1	0	0	?	?	0	3	1	3	3	2	2	1	2	0	2	1	1	1	0	1	0	3	?	1	1	1	2	1	1
Erunakicupes kryshtofovichi		3	1	2	2	2	2	0	0	2	1	2	2	1	1	1	3	2	2	?	2	0	2	1	?	?	0	1	0	3	1	1	0	1	2	2	1
Erunakicupes schmalhauseni		3	2	2	2	0	0	1	0	1	0	?	?	3	1	3	3	2	2	1	2	0	2	2	0	1	0	1	0	3	1	1	2	1	2	0	1
Karakanocoleus major		3	0	2	2	0	2	0	0	1	1	2	2	1	1	1	3	2	2	0	2	0	2	1	0	1	0	1	0	3	1	1	0	1	2	2	1
Karakanocoleus striatus		3	2	2	2	0	2	0	?	1	1	2	2	1	1	1	3	2	2	0	2	0	2	1	0	1	0	1	1	3	1	2	0	0	2	2	1
Karakanocoleus venjukovi		3	2	2	2	0	0	0	0	1	0	1	1	3	1	3	3	2	2	1	2	0	2	1	0	1	0	1	0	3	1	1	2	1	2	0	1
Rhombocoleites danutae		3	0	2	2	0	0	0	0	2	?	?	1	1	1	0	3	2	2	1	2	0	2	2	?	?	0	1	0	3	?	?	?	1	2	1	1
Rhombocoleus andreae		3	0	2	2	0	0	0	0	1	?	0	0	1	1	1	3	2	2	1	2	0	2	2	1	1	0	1	0	3	1	1	2	1	2	?	1
Rossocoleus aristovi		3	2	2	2	1	2	0	0	1	1	2	2	1	1	0	3	2	2	1	2	0	2	1	?	?	0	1	0	3	?	1	0	1	2	2	1
Metrorhynchites angustior		3	0	2	2	0	2	0	0	2	1	2	2	1	1	0	3	2	2	1	2	0	2	2	0	1	0	1	0	3	1	1	0	1	2	2	1
Metrorhynchites angustus		3	1	2	2	0	2	0	0	1	1	2	2	1	1	0	3	2	2	1	2	0	2	2	0	1	0	1	0	3	1	1	0	1	2	2	1
Metrorhynchites longus		3	0	2	2	0	2	0	1	2	1	2	2	1	1	0	3	2	2	1	2	0	2	2	0	1	0	1	0	3	1	1	0	1	2	2	1
Pseudochrysomelites sphenoidalis		3	0	2	2	0	2	0	0	0	1	2	2	1	1	2	3	2	2	1	2	0	2	0	1	1	0	1	0	3	1	1	0	1	2	2	1
Schizocoleidae indet. Ponomarenko 2004	Ponomarenko A G. Beetles (Insecta, Coleoptera) of the late Permian and early Triassic[J]. Paleontological Journal, 2004, 38(Suppl 2): S185-S196.	3	?	2	2	0	2	?	0	2	1	2	2	?	1	?	3	2	2	?	2	0	2	?	0	1	?	?	?	?	?	?	0	1	2	2	1
Schizocoleus depressus		3	2	2	2	0	2	0	0	2	1	2	2	1	1	0	3	2	2	1	2	0	2	0	0	1	0	1	0	3	?	1	0	1	2	2	1
Uskatocoleus micron		3	0	2	2	0	2	0	0	2	1	2	2	1	1	0	3	2	2	1	2	0	2	1	1	1	0	1	1	3	1	2	0	1	2	2	1
Uskatocoleus zalesskyi		3	0	2	2	0	?	0	0	2	1	1	1	0	1	0	3	2	2	1	2	0	2	1	0	1	0	1	0	3	1	0	1	1	2	1	1
Afrotaldycupes lidgettoniensis		3	0	1	1	0	2	1	0	2	1	2	2	3	1	3	0	1	?	1	?	0	2	1	?	1	0	1	0	3	?	1	0	1	1	2	1
Proterocupes nedubrovensis		3	0	1	1	0	2	1	0	1	1	2	2	3	1	3	1	1	0	1	1	0	2	0	0	1	0	1	0	3	0	?	0	1	1	2	1
Taldycupes khalfini		3	1	1	1	0	2	1	0	1	1	2	2	3	1	3	0	1	0	1	1	0	2	1	1	1	0	1	1	3	1	2	0	1	0	2	1
Tychticupes beljanini		3	1	1	1	0	2	1	0	1	1	2	2	3	1	3	1	1	0	1	1	0	2	0	0	1	0	1	1	3	1	2	0	1	0	2	1
Tychticupoides grjazevi		3	?	0	?	0	2	1	0	?	1	2	2	3	1	3	1	1	?	?	?	0	2	?	0	1	?	?	0	?	?	1	0	1	?	2	1
Permunda nana		3	0	2	2	0	1	1	0	2	1	?	0	3	1	3	3	2	2	1	2	0	2	1	?	?	?	?	?	?	?	?	1	1	2	1	1
Petrodromeus asiaticus		3	0	2	2	0	1	1	0	1	1	0	0	3	1	3	3	2	2	1	2	0	2	0	1	1	1	0	0	2	2	1	1	1	2	1	1
Tunguskagyrus planus		3	0	2	2	0	2	1	0	0	1	2	2	3	1	3	3	2	2	1	2	0	2	1	1	1	?	?	?	?	?	?	0	1	2	2	1
Tetracoleus meyeni		3	?	1	?	0	2	1	0	?	1	2	2	3	1	3	1	1	?	?	?	0	2	1	0	1	0	1	?	3	?	?	0	1	?	2	1
Archaeomalthus synoriacos		3	2	2	2	0	2	1	0	2	1	2	2	3	1	3	3	2	2	1	2	0	2	0	1	1	?	?	0	?	?	?	0	1	2	2	1
Schizocoleus triassicus		4	0	2	2	0	2	1	0	2	1	2	2	3	1	3	3	2	2	1	2	0	2	0	1	1	0	1	1	3	?	2	0	1	2	2	1
Pseudorhynchophora convexa		4	0	2	2	0	2	1	3	1	1	2	2	3	1	3	3	2	2	1	2	0	2	0	1	0	1	0	0	?	2	?	0	1	2	2	1
Pseudochrysomelites tumidus		4	0	2	2	0	2	1	0	2	1	2	2	3	1	3	3	2	2	1	2	0	2	0	?	?	0	0	1	3	2	2	0	1	2	2	1
Ademosyne wianamattensis		5	1	2	2	0	0	1	0	0	1	1	0	3	1	3	3	2	2	1	2	0	2	1	1	1	1	0	0	?	2	?	1	1	2	1	1
Adelidium cordatum		5	?	2	2	0	0	1	0	0	1	?	0	3	1	3	3	2	2	1	2	0	2	0	?	?	0	1	0	3	?	?	1	1	2	1	1
Asimma rara		5	0	1	?	0	2	1	0	2	1	2	2	3	1	3	?	1	?	1	?	0	2	2	?	1	0	1	?	3	1	?	0	1	?	2	1
Avocatinus elongatus		5	2	2	2	0	2	1	0	2	1	2	2	3	1	3	3	2	2	1	2	0	2	2	0	1	0	1	0	3	?	?	0	1	2	2	1
Catabrycus hoplites		5	0	2	2	0	2	?	0	2	1	2	2	?	1	?	3	2	2	1	2	0	2	2	?	?	0	1	0	3	?	?	0	1	2	2	1
Catinoides rotundatus		5	0	2	2	0	2	1	0	2	1	2	2	3	1	3	3	2	2	?	2	0	2	0	?	?	0	1	?	3	1	?	0	1	2	2	1
Cephalosyne capitata		5	0	2	2	0	0	1	0	2	?	?	0	3	1	3	3	2	2	1	2	0	2	1	?	?	0	1	0	3	?	?	?	1	2	?	1
Clathrocupes anthrilegnotos		5	0	0	1	0	2	1	0	1	1	2	2	3	1	3	1	1	0	1	1	0	2	1	1	1	1	0	0	1	2	1	0	1	1	2	1
Coleoptera indet. AHWW-0221	Y. C. Hong. 2007. Midtriassic new genera and species of Mesopanorpodidae (Insecta, Mecoptera) from Shaanxi, China. Acta Zootaxonomica Sinica 32(2):261-267	5	0	2	2	0	2	1	0	1	1	2	2	3	1	3	3	2	2	1	2	0	2	0	1	0	0	1	?	3	?	?	0	1	2	2	1
Coleoptera indet. 82TH6-1 T222	van Eldijk T, Goris G, Haarhuis A, et al. New fossil insects from the Anisian (lower to middle Muschelkalk) from the central European Basin (Germany and the Netherlands)[J]. PalZ, 2017, 91(2): 185-194.	5	0	2	2	0	2	0	0	1	1	2	2	1	1	0	3	2	2	1	2	0	2	1	?	?	0	1	0	3	1	1	0	1	2	2	1
Cupesia serricornia		5	0	0	1	0	2	1	0	2	1	2	2	3	1	3	1	0	0	1	1	0	2	2	?	1	1	0	0	0	2	1	0	1	1	2	1
Delpuentesyne menendezi		5	0	2	2	0	0	1	0	2	?	?	0	3	1	3	3	2	2	1	2	0	2	2	1	1	?	?	?	?	?	?	2	1	2	1	1
Dolichosyne confragosa		5	0	2	2	0	0	1	0	2	0	0	0	3	1	3	3	2	2	1	2	0	2	2	1	1	0	1	0	3	?	?	1	1	2	1	1
Dytiscoidea indet. NIGP162054	Zheng D, Chang S C, Wang H, et al. Middle-Late Triassic insect radiation revealed by diverse fossils and isotopic ages from China[J]. Science advances, 2018, 4(9): eaat1380.	5	0	2	2	0	2	1	0	1	1	2	2	3	1	3	3	2	2	1	2	0	2	0	?	?	1	0	?	2	2	?	0	1	2	2	1
Elateridium angustius		5	0	2	2	0	2	1	0	0	1	2	2	3	1	3	3	2	2	1	2	0	2	2	0	1	0	0	0	3	2	1	0	1	2	2	1
Elateriformia indet. NIGP162053	Zheng D, Chang S C, Wang H, et al. Middle-Late Triassic insect radiation revealed by diverse fossils and isotopic ages from China[J]. Science advances, 2018, 4(9): eaat1380.	5	0	2	2	0	?	1	0	1	?	?	0	3	1	3	3	2	2	1	2	0	2	0	?	?	0	1	?	3	?	?	0	1	2	?	1
Etheridgea petrica		5	0	2	2	0	2	?	0	1	1	2	2	?	1	?	3	2	2	1	2	2	?	1	0	1	0	1	0	3	?	?	0	1	2	2	1
Flichea lotharingiaca		5	2	2	2	0	2	1	0	0	1	2	2	3	1	3	3	2	2	1	2	0	2	0	1	1	?	?	?	?	?	?	0	1	2	2	1
Frankencupes ultimus		5	1	0	1	0	2	1	0	2	1	2	2	3	1	3	0	0	0	1	1	0	2	0	0	1	1	0	?	1	2	?	0	1	0	2	1
Gnathopeltos dixis		5	2	2	2	0	0	1	0	1	?	?	0	3	1	3	3	2	2	1	2	0	2	1	?	?	0	1	0	3	1	1	?	1	2	?	1
Guillermia lecticula		5	?	2	2	0	0	1	0	2	?	0	0	3	1	3	3	2	2	1	2	0	2	2	1	1	0	1	?	3	?	?	1	1	2	1	1
Hadeocoleus gigas		5	0	2	2	0	2	1	0	2	1	2	2	3	1	3	3	2	2	1	2	0	2	2	0	1	1	0	0	2	2	1	0	1	2	2	1
Kirghizocupes indistinctus		5	0	0	1	0	2	1	0	1	1	2	2	3	1	3	1	1	0	1	1	0	2	2	?	1	1	0	0	0	2	?	0	1	1	2	1
Lethocoleus sternalis		5	0	2	2	0	2	?	0	2	1	2	2	?	1	?	3	2	2	1	2	0	2	2	0	1	0	1	0	3	?	?	0	1	2	2	1
Lithocupes punctatus		5	0	1	1	0	2	1	0	1	1	2	2	3	1	3	1	0	0	1	1	0	2	1	?	1	1	0	0	0	2	1	0	1	1	2	1
Macrocatinius brachycephalus		5	0	2	2	0	2	1	0	2	1	2	2	3	1	3	3	2	2	1	2	0	2	1	?	?	0	1	0	3	?	?	0	1	2	2	1
Madygenorhynchus multifidus		5	0	2	2	0	0	1	0	2	?	0	0	3	1	3	3	2	2	1	2	0	2	2	1	1	?	?	?	?	?	?	1	1	2	?	1
Metrorhynchites angustum		5	0	2	2	0	2	1	0	0	1	2	2	3	1	3	3	2	2	1	2	0	2	2	0	1	0	0	0	3	2	1	0	1	2	2	1
Metrorhynchites dunstani		5	0	2	2	0	?	1	0	?	?	1	1	3	1	3	3	2	2	1	2	0	2	?	0	1	?	?	?	?	?	?	1	1	2	?	1
Metrorhynchites grandis		5	0	2	2	0	2	?	0	?	1	2	2	?	1	?	3	2	2	1	2	0	2	?	0	1	0	0	0	3	2	?	0	0	2	2	1
Notocupes .Sp MCSN 5002	KRZEMINSKI W, LOMBARDO C. NEW FOSSIL, EPHEMIEROPTERA AND COLEOPTERA FROM THE LADINIAN[J]. Rivista Italiana di Paleontologia e Stratigrafia, 2001, 107(1): 69-78.	5	2	1	1	0	2	1	0	1	1	2	2	3	1	3	1	1	0	1	?	0	2	1	0	1	?	?	?	?	?	?	0	1	1	2	1
Notocupoides triassicus		5	0	0	1	0	2	1	0	2	1	2	2	3	1	3	0	0	0	1	1	0	2	2	?	1	1	0	0	0	2	?	0	1	1	2	1
Obrienia kuscheli		5	0	2	2	0	0	1	0	1	1	0	0	3	1	3	3	2	2	1	2	0	2	1	1	1	0	1	0	3	?	?	1	1	2	1	1
Obrieniidae indet. Zherikhin and Gratshev 1723/591	V. V. Zherikhin and V. G. Gratshev. 1993. Obrieniidae, fam. nov., the oldest Mesozoic weevils (Coleoptera, Curculionoidea). Paleontological Journal 27(1A):50-68	5	0	2	2	0	0	1	0	2	?	0	0	3	1	3	3	2	2	1	2	0	2	2	1	1	0	1	?	3	?	?	1	1	2	1	1
Obrieniidae indet. Zherikhin and Gratshev 2070/1501	V. V. Zherikhin and V. G. Gratshev. 1993. Obrieniidae, fam. nov., the oldest Mesozoic weevils (Coleoptera, Curculionoidea). Paleontological Journal 27(1A):50-68	5	0	2	2	0	0	1	0	2	?	0	0	3	1	3	3	2	2	1	2	0	2	2	1	1	0	1	?	3	?	?	1	1	2	1	1
Obrieniidae indet. Zherikhin and Gratshev 2785/2360	V. V. Zherikhin and V. G. Gratshev. 1993. Obrieniidae, fam. nov., the oldest Mesozoic weevils (Coleoptera, Curculionoidea). Paleontological Journal 27(1A):50-68	5	0	2	2	0	0	1	0	2	1	0	0	3	1	3	3	2	2	1	2	0	2	2	1	1	0	1	0	3	?	?	1	1	2	1	1
Ofthalmopeltos synkritos		5	0	2	2	0	0	1	0	2	?	?	0	3	1	3	3	2	2	?	2	0	2	1	?	?	0	1	0	3	?	?	?	1	2	?	1
Peltosyne triassica		5	0	2	2	0	0	1	0	0	0	0	0	3	1	3	3	2	2	1	2	0	2	0	1	0	1	1	0	?	?	?	2	1	2	1	1
Pesus prognathus		5	?	2	2	0	2	?	0	1	1	2	2	?	1	?	3	2	2	1	2	0	2	0	?	?	?	?	?	?	?	?	0	1	2	2	1
Platycupes dolichocerus		5	0	0	1	0	2	1	0	2	1	2	2	3	1	3	1	1	0	1	1	0	2	0	?	1	1	0	?	0	2	?	0	1	1	2	1
Praesagus capitatus		5	0	2	2	0	2	?	0	1	1	2	2	?	1	?	3	2	2	1	2	0	2	1	?	?	0	1	0	3	1	1	0	1	2	2	1
Procupes mandibularis		5	0	1	1	0	2	1	0	2	1	2	2	3	1	3	?	1	0	1	?	0	2	2	?	1	1	0	?	0	2	?	0	1	?	2	1
Pseudochrysomelites planus		5	0	2	2	0	2	1	0	2	1	2	2	3	1	3	3	2	2	1	2	0	2	0	1	0	0	1	0	3	1	1	0	1	2	2	1
Pterocupes leptocerus		5	0	?	?	0	2	1	0	2	1	2	2	3	1	3	?	1	0	1	?	0	2	1	?	1	1	0	?	0	2	?	0	1	1	2	1
Rhabdocupes baculatus		5	2	0	1	0	2	1	0	1	1	2	2	3	1	3	1	0	0	1	1	0	2	2	?	1	1	0	?	0	2	?	0	1	1	2	1
Salebroferus asper		5	0	2	2	0	2	0	0	1	1	2	2	1	1	1	3	2	2	?	2	0	2	0	0	1	0	1	0	3	?	?	0	1	2	2	1
Schizophorinus punctatus		5	0	2	2	0	2	?	0	2	1	2	2	?	1	?	3	2	2	1	2	0	2	2	?	?	0	1	0	3	?	?	0	1	2	2	1
Schizophoroides glaber		5	0	2	2	0	2	0	0	2	1	2	2	1	1	0	3	2	2	1	2	0	2	1	?	?	0	1	0	3	?	?	0	1	2	2	1
Sogdelytron tristichus		5	2	?	1	0	2	1	0	1	1	2	2	3	1	3	1	0	0	1	0	0	2	0	0	1	0	1	0	3	1	1	0	1	?	2	1
Sogdodromeus altus		5	0	2	2	0	2	1	0	2	1	2	2	3	1	3	3	2	2	1	2	0	2	0	?	0	0	1	0	3	?	?	0	1	2	2	1
Stargelytron altus		5	0	2	2	0	2	1	0	1	1	2	2	3	1	3	3	2	2	1	2	0	2	0	?	?	0	1	?	3	?	?	0	1	2	2	1
Stegosyne borealis		5	2	2	2	0	2	1	0	2	1	2	2	3	1	3	3	2	2	1	2	0	2	0	0	0	0	1	0	3	1	1	0	1	2	2	1
Tetracoleus tshalyshevi		5	0	1	1	0	2	1	0	3	1	2	2	3	1	3	0	0	0	0	1	0	2	1	0	1	0	1	1	3	?	2	0	1	1	2	1
Thnesidius xyphophorus		5	2	2	2	0	2	?	0	1	1	2	2	?	1	?	3	2	2	1	2	0	2	1	?	?	0	1	0	3	?	1	0	1	2	2	1
Triadocupes ferghanensis		5	0	0	1	0	2	1	0	1	1	2	2	3	1	3	1	1	0	1	1	0	2	0	?	1	1	0	0	0	2	?	0	1	1	2	1
Triaplidae indet. 2905/24	Kirejtshuk A G, Prokin A A. The position of the Palaeozoic genus Tunguskagyrus Yan, Beutel et Lawrence in the family Triaplidae sensu n.(Coleoptera, Archostemata: Schizophoroidea)[J]. Entomological Review, 2018, 98(7): 872-882.	5	?	2	2	0	2	1	0	2	1	2	2	3	1	3	3	2	2	?	2	0	2	2	1	0	0	1	0	3	1	?	0	1	2	2	1
Triaplus macroplatus		5	0	2	2	0	2	1	0	2	1	2	2	3	1	3	3	2	2	1	2	0	2	2	1	0	0	1	0	3	1	1	0	1	2	2	1
Triassocatinius brachynotus		5	?	2	2	0	2	1	0	2	1	2	2	3	1	3	3	2	2	1	2	0	2	1	?	?	?	?	?	?	?	?	0	1	2	2	1
Triassocoleus tortulosus		5	0	2	2	0	2	?	0	2	1	2	2	?	1	?	3	2	2	1	2	0	2	1	0	1	?	?	?	?	?	?	0	1	2	2	1
Triassocupes yaochaensis		5	0	?	1	0	2	1	0	1	1	2	2	3	1	3	?	0	?	?	0	0	2	1	0	1	0	1	0	3	1	1	0	1	?	2	1
Tricoleodes acutus		5	1	0	1	0	2	1	0	2	1	2	2	3	1	3	2	0	0	0	1	0	2	1	?	1	1	0	0	2	2	?	0	1	0	2	1
Zygadenia shiluoensis		5	0	0	1	0	2	1	0	1	1	2	2	3	1	3	1	0	0	1	1	0	2	1	0	1	0	1	0	3	1	1	0	1	1	2	1
A6875	Papier F, Nel A, Grauvogel-Stamm L, et al. La diversité des Coleoptera (Insecta) du Trias dans le nord-est de la France[J]. Geodiversitas, 2005, 27(2): 181-199.	5	0	2	2	0	0	1	0	0	?	1	0	3	1	3	3	2	2	1	2	0	2	2	?	?	0	1	?	3	?	?	1	1	2	1	1
A7006	Papier F, Nel A, Grauvogel-Stamm L, et al. La diversité des Coleoptera (Insecta) du Trias dans le nord-est de la France[J]. Geodiversitas, 2005, 27(2): 181-199.	5	0	2	2	0	2	1	0	2	1	2	2	3	1	3	3	2	2	1	2	0	2	2	?	?	0	1	0	3	?	?	0	1	2	2	0
A7331	Papier F, Nel A, Grauvogel-Stamm L, et al. La diversité des Coleoptera (Insecta) du Trias dans le nord-est de la France[J]. Geodiversitas, 2005, 27(2): 181-199.	5	0	2	2	0	0	1	0	1	1	1	1	3	1	3	3	2	2	1	2	0	2	2	?	?	0	1	0	3	?	?	1	1	2	1	1
A7172	Papier F, Nel A, Grauvogel-Stamm L, et al. La diversité des Coleoptera (Insecta) du Trias dans le nord-est de la France[J]. Geodiversitas, 2005, 27(2): 181-199.	5	0	2	2	0	0	1	0	2	1	?	?	3	1	3	3	2	2	1	2	0	2	2	?	?	1	0	0	?	2	?	1	1	2	1	1
A6641	Papier F, Nel A, Grauvogel-Stamm L, et al. La diversité des Coleoptera (Insecta) du Trias dans le nord-est de la France[J]. Geodiversitas, 2005, 27(2): 181-199.	5	0	2	2	0	2	1	0	2	1	2	2	3	1	3	3	2	2	1	2	0	2	0	?	?	1	0	0	?	2	?	0	1	2	2	0
A6981	Papier F, Nel A, Grauvogel-Stamm L, et al. La diversité des Coleoptera (Insecta) du Trias dans le nord-est de la France[J]. Geodiversitas, 2005, 27(2): 181-199.	5	0	2	2	0	0	1	0	1	1	?	0	3	1	3	3	2	2	1	2	0	2	0	?	?	1	0	?	?	2	?	?	1	2	1	1
A6773	Papier F, Nel A, Grauvogel-Stamm L, et al. La diversité des Coleoptera (Insecta) du Trias dans le nord-est de la France[J]. Geodiversitas, 2005, 27(2): 181-199.	5	0	2	2	0	0	1	0	1	?	1	1	3	1	3	3	2	2	1	2	0	2	1	?	?	0	1	0	3	?	?	1	1	2	1	1
A7025	Papier F, Nel A, Grauvogel-Stamm L, et al. La diversité des Coleoptera (Insecta) du Trias dans le nord-est de la France[J]. Geodiversitas, 2005, 27(2): 181-199.	5	0	2	2	0	2	1	0	1	1	2	2	3	1	3	3	2	2	1	2	0	2	2	?	?	1	0	0	?	2	?	0	1	2	2	0
A6639	Papier F, Nel A, Grauvogel-Stamm L, et al. La diversité des Coleoptera (Insecta) du Trias dans le nord-est de la France[J]. Geodiversitas, 2005, 27(2): 181-199.	5	0	2	2	0	0	1	0	1	?	?	0	3	1	3	3	2	2	1	2	0	2	2	?	?	0	1	?	3	?	?	1	1	2	1	1
A6952	Papier F, Nel A, Grauvogel-Stamm L, et al. La diversité des Coleoptera (Insecta) du Trias dans le nord-est de la France[J]. Geodiversitas, 2005, 27(2): 181-199.	5	0	2	2	0	0	1	0	2	1	1	1	3	1	3	3	2	2	1	2	0	2	2	?	?	1	0	0	?	2	?	1	1	2	1	1
A6664	Papier F, Nel A, Grauvogel-Stamm L, et al. La diversité des Coleoptera (Insecta) du Trias dans le nord-est de la France[J]. Geodiversitas, 2005, 27(2): 181-199.	5	2	2	2	0	0	1	0	1	?	?	?	3	1	3	3	2	2	1	2	0	2	0	?	?	0	1	0	3	?	?	?	1	2	?	1
A6801	Papier F, Nel A, Grauvogel-Stamm L, et al. La diversité des Coleoptera (Insecta) du Trias dans le nord-est de la France[J]. Geodiversitas, 2005, 27(2): 181-199.	5	0	2	2	0	2	1	0	2	1	2	2	3	1	3	3	2	2	1	2	0	2	1	?	?	0	1	0	3	?	?	0	1	2	2	0
A6969	Papier F, Nel A, Grauvogel-Stamm L, et al. La diversité des Coleoptera (Insecta) du Trias dans le nord-est de la France[J]. Geodiversitas, 2005, 27(2): 181-199.	5	0	2	2	0	0	1	0	1	1	?	0	3	1	3	3	2	2	1	2	0	2	1	?	?	1	0	0	?	2	?	1	1	2	1	1
A6673	Papier F, Nel A, Grauvogel-Stamm L, et al. La diversité des Coleoptera (Insecta) du Trias dans le nord-est de la France[J]. Geodiversitas, 2005, 27(2): 181-199.	5	0	2	2	0	2	1	0	2	1	2	2	3	1	3	3	2	2	1	2	0	2	0	0	1	1	0	?	?	2	?	0	1	2	2	1
A6690	Papier F, Nel A, Grauvogel-Stamm L, et al. La diversité des Coleoptera (Insecta) du Trias dans le nord-est de la France[J]. Geodiversitas, 2005, 27(2): 181-199.	5	0	0	1	0	2	1	0	1	1	2	2	3	1	3	0	1	?	?	1	0	2	1	?	1	1	0	0	?	2	?	0	1	1	2	1
A6669	Papier F, Nel A, Grauvogel-Stamm L, et al. La diversité des Coleoptera (Insecta) du Trias dans le nord-est de la France[J]. Geodiversitas, 2005, 27(2): 181-199.	5	0	1	1	0	2	1	0	2	1	2	2	3	1	3	0	1	?	1	1	0	2	0	?	1	0	1	?	3	?	?	0	1	?	2	1
A7364	Papier F, Nel A, Grauvogel-Stamm L, et al. La diversité des Coleoptera (Insecta) du Trias dans le nord-est de la France[J]. Geodiversitas, 2005, 27(2): 181-199.	5	1	1	1	0	2	1	0	2	1	2	2	3	1	3	?	1	?	1	?	0	2	1	0	1	1	0	0	?	2	?	0	1	?	2	1
A6713	Papier F, Nel A, Grauvogel-Stamm L, et al. La diversité des Coleoptera (Insecta) du Trias dans le nord-est de la France[J]. Geodiversitas, 2005, 27(2): 181-199.	5	0	?	1	0	2	1	0	2	1	2	2	3	1	3	1	0	0	1	?	0	2	2	?	1	1	0	0	?	2	?	0	1	1	2	1
A6684	Papier F, Nel A, Grauvogel-Stamm L, et al. La diversité des Coleoptera (Insecta) du Trias dans le nord-est de la France[J]. Geodiversitas, 2005, 27(2): 181-199.	5	2	?	1	0	2	1	0	2	1	2	2	3	1	3	0	1	1	1	?	0	2	0	?	1	?	?	0	?	?	?	0	1	?	2	1
A6755	Papier F, Nel A, Grauvogel-Stamm L, et al. La diversité des Coleoptera (Insecta) du Trias dans le nord-est de la France[J]. Geodiversitas, 2005, 27(2): 181-199.	5	0	0	1	0	2	1	0	3	1	2	2	3	1	3	1	1	0	1	1	0	2	1	?	1	?	?	?	?	?	?	0	1	1	2	1
A9346	Papier F, Nel A, Grauvogel-Stamm L, et al. La diversité des Coleoptera (Insecta) du Trias dans le nord-est de la France[J]. Geodiversitas, 2005, 27(2): 181-199.	5	0	2	2	0	2	1	0	1	1	2	2	3	1	3	3	2	2	1	2	0	2	1	1	1	0	1	0	3	?	?	0	1	2	2	1
A6636	Papier F, Nel A, Grauvogel-Stamm L, et al. La diversité des Coleoptera (Insecta) du Trias dans le nord-est de la France[J]. Geodiversitas, 2005, 27(2): 181-199.	5	0	2	2	0	2	1	0	?	1	2	2	3	1	3	3	2	2	1	2	0	2	1	1	1	?	?	?	?	?	?	0	1	2	2	1
A6632	Papier F, Nel A, Grauvogel-Stamm L, et al. La diversité des Coleoptera (Insecta) du Trias dans le nord-est de la France[J]. Geodiversitas, 2005, 27(2): 181-199.	5	0	2	2	0	2	1	0	1	1	2	2	3	1	3	3	2	2	1	2	0	2	1	1	1	0	1	?	3	?	?	0	1	2	2	1
A6634	Papier F, Nel A, Grauvogel-Stamm L, et al. La diversité des Coleoptera (Insecta) du Trias dans le nord-est de la France[J]. Geodiversitas, 2005, 27(2): 181-199.	5	0	2	2	0	2	1	0	2	1	2	2	3	1	3	3	2	2	1	2	0	2	0	1	1	?	?	0	?	?	?	0	1	2	2	1

## Sheet: species level
Species	Reference	Group	Char1	Char2	Char3	Char4	Char5	Char6	Char7	Char8	Char9	Char10	Char11	Char12	Char13	Char14	Char15	Char16	Char17	Char18	Char19	Char20	Char21	Char22	Char23	Char24	Char25	Char26	Char27	Char28	Char29	Char30	Char31	Char32	Char33	Char34	Char35
Afrocupes firmae		1	0	1	1	0	2	1	0	2	1	2	2	3	1	3	1	1	0	1	?	0	2	2	?	1	0	1	0	3	0	0	0	1	?	2	1
Avocoleus fractus		1	0	0	1	0	2	1	0	0	1	2	2	3	1	3	0	0	0	1	0	0	2	2	0	1	1	0	0	1	2	0	0	1	0	2	1
Boscoleus blandus		1	0	0	1	0	2	1	0	0	1	2	2	3	1	3	0	0	0	?	0	0	2	2	0	1	1	0	0	1	2	0	0	1	0	2	1
Coleopsis archaica		1	0	?	1	0	2	1	0	1	1	2	2	3	1	3	?	0	0	1	0	0	2	2	?	1	1	0	0	?	2	?	0	1	?	2	1
Eocoleus scaber		1	0	0	1	0	2	1	0	0	1	2	2	3	1	3	0	0	0	1	0	0	2	2	0	1	1	0	0	1	2	0	0	1	0	2	1
Liberocoleus intactus		1	?	1	1	0	2	1	0	0	1	2	2	3	1	3	1	0	?	?	0	0	2	1	0	1	1	0	0	2	2	0	0	1	0	2	1
Maricoleus valentinae		1	0	0	1	0	2	1	0	0	1	2	2	3	1	3	0	0	0	1	0	0	2	1	?	1	1	0	?	0	2	?	0	1	0	2	1
Moravocoleus perditus		1	0	0	1	0	2	1	0	?	1	2	2	3	1	3	0	0	0	1	0	0	2	1	0	1	1	0	0	1	2	0	0	1	0	2	1
Moravocoleus permianus		1	2	0	0	0	2	1	0	2	1	2	2	3	1	3	0	0	0	1	0	0	2	2	0	1	1	0	0	1	2	0	0	1	0	2	1
Oborocoleus rohdendorfi		1	2	1	1	0	2	1	0	2	1	2	2	3	1	3	1	0	?	1	0	0	2	0	0	1	1	0	0	?	2	0	0	1	0	2	1
Pachypleurites nodosus		1	1	?	1	0	2	1	0	3	1	2	2	3	?	3	?	0	?	1	?	0	2	0	0	1	?	?	?	?	?	?	0	1	?	2	1
Permocoleus wellingtonensis		1	?	0	1	0	2	1	0	1	1	2	2	3	1	3	1	0	0	0	0	0	2	2	?	1	0	1	?	3	?	?	0	1	0	2	1
Pintolla ponomarenkoi		1	2	1	1	0	2	1	0	1	1	2	2	3	1	3	1	1	0	0	0	0	2	1	?	1	0	1	0	3	0	0	0	1	0	2	1
Prosperocoleus prosperus		1	?	0	1	0	2	1	0	2	1	2	2	3	1	3	0	0	?	?	0	0	2	2	0	1	1	0	0	1	2	0	0	1	0	2	1
Protocupoides rohdendorfi		1	0	1	?	0	2	1	0	1	1	2	2	3	1	3	1	0	0	1	?	0	2	?	?	1	0	1	0	3	?	0	0	1	?	2	1
Retelytron conopeum		1	?	0	1	0	2	1	0	2	1	2	2	3	1	3	0	0	?	?	0	0	2	2	?	1	1	0	0	1	2	?	0	1	0	2	1
Sylvacoleodes admirandus		1	2	0	1	0	2	1	0	2	1	2	2	3	1	3	2	0	1	1	?	0	2	2	?	1	1	0	1	1	2	2	0	1	0	2	1
Sylvacoleus richteri		1	2	0	1	0	2	1	0	2	1	2	2	3	1	3	0	0	1	1	0	0	2	2	0	1	1	0	0	1	2	0	0	1	0	2	1
Tshekardocoleidae indet. Kukalová No. 10/1968	J. Kukalová. 1968. On the systematic position of the supposed Permian beetles, Tschecardocoleidae, with a description of a new collection from Moravia. Sbornik geologickych ved, paleontologie 11:139-161	1	?	0	1	0	2	1	0	?	1	2	2	3	?	3	0	0	?	?	0	0	2	?	?	1	?	?	?	?	?	?	0	1	0	2	1
Tshekardocoleus minor		1	2	0	1	0	2	1	0	1	1	2	2	3	1	3	0	0	1	1	0	0	2	0	?	1	1	0	0	1	2	?	0	1	0	2	1
Umoricoleus perplex		1	?	0	1	0	2	1	0	?	1	2	2	3	?	3	0	0	?	?	0	0	2	2	0	1	?	?	0	?	?	0	0	1	0	2	1
Uralocoleus splendens		1	?	?	1	0	2	1	0	?	1	2	2	3	1	3	?	0	0	1	?	0	2	1	0	1	1	0	?	?	2	?	0	1	?	2	1
Votocoleus submissus		1	0	0	0	0	2	1	0	0	1	2	2	3	1	3	1	0	0	1	0	0	2	1	0	1	1	0	0	0	2	0	0	1	0	2	1
Avocoleus neglegens		1	?	0	1	0	2	1	0	0	1	2	2	3	1	3	0	0	?	?	?	0	2	2	0	1	1	0	0	1	2	0	0	1	0	2	1
Sylvacoleus sharovi		1	0	0	1	0	2	1	0	0	1	2	2	3	1	3	0	0	1	0	0	0	2	2	1	1	1	0	0	1	2	0	0	1	0	2	1
Tshekardocoleus magnus		1	0	0	1	0	2	1	0	0	1	2	2	3	1	3	0	0	?	?	0	0	2	2	?	1	1	0	?	1	2	?	0	1	0	2	1
Chaocoleus limnebius		2	0	2	2	0	0	1	0	2	?	?	?	3	1	3	3	2	2	1	2	0	2	1	?	?	0	1	0	3	1	1	?	1	2	?	1
Asiocoleopsis hongi		2	0	0	1	0	2	1	0	1	1	2	2	3	1	3	0	0	0	1	0	0	2	0	0	1	1	0	0	1	2	?	0	1	0	2	1
Asiocoleus novojilovi		2	2	1	0	0	2	1	0	0	1	2	2	3	1	3	2	0	0	1	0	0	2	2	0	1	0	1	0	3	0	0	0	1	0	2	1
Bicoleus kuplensis		2	0	1	1	0	2	1	0	0	1	2	2	3	1	3	2	0	0	1	1	0	2	0	0	1	0	1	0	3	0	?	0	1	1	2	1
Schizotaldycupes ananjevi		2	2	1	1	0	2	0	0	1	1	2	2	1	1	1	1	0	1	1	1	0	2	1	0	1	0	1	0	3	0	0	0	1	0	2	1
Schizotaldycupes beckermigdisovae		2	0	1	1	0	2	1	0	1	1	2	2	3	1	3	1	1	1	1	1	0	2	2	0	1	0	1	1	3	0	2	0	1	1	2	1
Schizotaldycupes pubescens		2	2	1	1	0	2	0	0	2	1	2	2	1	1	0	1	0	1	1	1	0	2	1	0	1	0	1	0	3	1	0	0	1	0	2	1
Tetracoleus orenburgensis		2	0	0	?	0	2	1	0	?	1	2	2	3	1	3	2	0	?	?	?	0	2	?	0	1	0	1	0	3	1	?	0	1	0	2	1
Archosyne permiana		2	2	2	2	0	0	1	0	2	1	0	0	3	1	3	3	2	2	1	2	0	2	0	?	?	1	1	0	?	1	?	2	1	2	1	1
Archicupes reichardti		2	0	1	1	0	2	1	0	2	1	2	2	3	1	3	0	0	1	1	0	0	2	2	0	1	0	1	0	3	0	?	0	1	0	2	1
Protocupes martynovi		2	0	1	1	0	2	1	0	1	1	2	2	3	1	3	2	0	0	?	?	0	2	2	0	1	0	1	0	3	0	0	0	1	?	2	1
Protocupes ogloblini		2	?	1	1	0	2	1	0	?	1	2	2	3	?	3	1	1	?	?	?	0	2	?	0	1	?	?	?	?	?	?	0	1	1	2	1
Archicupes jacobsoni		2	0	0	1	0	2	1	0	1	1	2	2	3	1	3	0	0	0	0	0	0	2	2	0	1	1	0	0	0	2	0	0	1	0	2	1
Cytocupes angustus		2	0	0	1	0	2	1	0	1	1	2	2	3	1	3	2	0	0	1	1	0	2	2	0	1	1	0	0	1	2	0	0	1	0	2	1
Cytocupoides elongatus		2	1	0	1	0	2	1	0	2	1	2	2	3	1	3	2	0	0	1	1	0	2	2	1	1	0	0	1	3	2	2	0	1	0	2	1
Eocupes cellulosus		2	0	0	1	0	2	1	0	1	1	2	2	3	1	3	2	0	?	?	?	0	2	?	?	1	1	0	0	1	2	0	0	1	0	2	1
Eocupes lukjanovitshi		2	2	1	1	0	2	1	0	2	1	2	2	3	1	3	1	0	1	1	1	0	2	2	1	1	0	1	0	3	0	0	0	1	0	2	1
Ichthyocupes tyzhnovi		2	2	1	?	0	2	1	0	1	1	2	2	3	1	3	2	0	0	1	?	0	2	1	0	1	0	1	1	3	1	2	0	1	1	2	1
Kaltanicupes acutus		2	1	0	1	0	2	1	0	2	1	2	2	3	1	3	0	0	0	1	1	0	2	2	?	1	1	0	0	1	2	0	0	1	0	2	1
Kaltanicupes kitjakensis		2	1	1	1	0	2	1	0	3	1	2	2	3	1	3	1	0	1	0	0	0	2	1	?	1	1	0	0	1	2	0	0	1	0	2	1
Kaltanicupes richteri		2	?	0	1	0	2	1	0	?	1	2	2	3	1	3	0	0	0	?	?	0	2	?	0	1	1	0	0	0	2	0	0	1	0	2	1
Kaltanocoleus pospelovi		2	0	0	1	0	2	1	0	1	1	2	2	3	1	3	1	0	0	0	0	0	2	2	?	1	0	1	1	3	0	2	0	1	?	2	1
Linicupes yinpinensis		2	?	0	1	0	2	1	0	1	1	2	2	3	1	3	0	0	0	1	1	0	2	0	0	1	1	0	?	0	2	?	0	1	0	2	1
Permocupes distinctus		2	?	0	1	0	2	1	0	?	1	2	2	3	?	3	0	0	1	?	1	0	2	2	?	1	?	?	0	?	?	0	0	1	0	2	1
Permocupes grandis		2	?	1	?	0	2	1	0	?	1	2	2	3	1	3	1	0	0	1	?	0	2	?	?	1	1	0	0	?	2	0	0	1	?	2	1
Permocupes latus		2	2	0	1	0	2	1	0	1	1	2	2	3	1	3	0	0	1	0	1	0	2	1	?	1	1	0	0	1	2	?	0	1	0	2	1
Permocupes semenovi		2	2	0	1	0	2	1	0	2	1	2	2	3	1	3	2	0	1	1	?	0	2	1	?	1	1	0	0	0	2	0	0	1	0	2	1
Permocupes sojanensis		2	0	0	1	0	2	1	0	2	1	2	2	3	1	3	2	0	1	0	1	0	2	2	?	1	0	1	0	3	0	0	0	1	0	2	1
Protocupoides elongatus		2	2	0	1	0	2	1	0	3	1	2	2	3	1	3	0	0	1	0	1	0	2	2	?	1	0	1	0	3	0	?	0	1	0	2	1
Protocupoides plavilstshikovi		2	0	1	?	0	2	1	0	?	1	2	2	3	1	3	2	0	1	1	?	0	2	2	0	1	0	1	0	3	1	1	0	1	0	2	1
Protocupoides sharovi		2	?	1	1	0	2	1	0	?	1	2	2	3	1	3	0	0	1	0	?	0	2	?	0	1	0	1	0	3	1	1	0	1	?	2	1
Tatarocupes granulatus		2	1	0	1	0	2	1	0	2	1	2	2	3	1	3	2	1	1	1	1	0	2	2	0	1	0	1	0	3	1	1	0	1	0	2	1
Uralocupes major		2	?	0	1	0	2	1	0	1	1	2	2	3	1	3	1	0	1	?	1	0	2	1	?	1	1	0	0	1	2	0	0	1	0	2	1
Palademosyne martynovae		2	0	2	2	0	2	1	0	1	1	2	2	3	1	3	3	2	2	1	2	0	2	0	0	1	1	0	0	2	2	1	0	1	2	2	1
Sakmaracoleus orenburgensis		2	0	2	2	0	0	1	0	?	0	1	0	3	1	3	3	2	2	1	2	0	2	?	1	1	?	?	0	?	?	1	2	1	2	0	1
Dikerocoleus divisus		2	0	2	2	0	2	1	0	2	1	2	2	3	1	3	3	2	2	1	2	0	2	1	1	1	0	1	0	3	1	1	0	1	2	2	1
Erunakicupes brevis		2	2	2	2	0	0	0	0	2	0	1	0	1	1	0	3	2	2	1	2	0	2	1	?	?	0	1	0	3	0	?	?	1	2	1	1
Erunakicupes obrutshevi		2	2	2	2	0	0	0	0	1	1	?	0	1	1	0	3	2	2	1	2	0	2	0	0	1	0	1	0	3	0	0	1	1	2	1	1
Karakanocoleus europeus		2	0	2	2	0	0	0	0	2	?	?	0	1	1	0	3	2	2	1	2	0	2	1	?	?	0	1	0	3	?	?	?	1	2	1	1
Karakanocoleus janischewskyi		2	2	2	2	0	2	0	0	1	1	2	2	1	1	1	3	2	2	1	2	0	2	1	0	1	0	1	0	3	1	1	0	1	2	2	1
Rhombocoleus gomankovi		2	?	2	2	0	2	0	3	?	1	2	2	?	1	2	3	2	2	?	2	0	2	2	?	?	0	1	0	3	?	?	0	1	2	2	1
Rossocoleus altus		2	2	2	2	?	2	0	0	1	1	2	2	1	1	1	3	2	2	1	2	0	2	1	?	1	0	1	0	3	1	1	0	1	2	2	1
Rossocoleus angustus		2	?	2	2	0	0	0	0	1	1	1	1	1	1	0	3	2	2	?	2	0	2	2	?	1	0	1	0	3	1	1	1	1	2	1	1
Rossocoleus avus		2	1	2	2	0	2	0	0	2	1	2	2	1	1	0	3	2	2	?	2	1	1	1	0	1	0	1	1	3	1	2	0	1	2	2	1
Rossocoleus grandis		2	0	2	2	0	2	0	0	2	1	2	2	1	1	0	3	2	2	1	2	2	0	1	0	1	0	1	0	3	0	0	0	1	2	2	1
Rossocoleus latior		2	0	2	2	0	2	0	0	1	1	2	2	1	1	1	3	2	2	1	2	1	1	1	0	1	0	1	0	3	1	1	0	1	2	2	1
Rossocoleus latus		2	?	2	2	0	2	0	0	1	1	2	2	1	1	1	3	2	2	?	2	1	1	1	0	1	0	1	0	3	1	1	0	1	2	2	1
Rossocoleus novojilovi		2	0	2	2	1	2	0	0	1	1	2	2	0	1	0	3	2	2	1	2	0	2	1	?	1	1	0	0	?	2	?	0	1	2	2	1
Rossocoleus parvus		2	1	2	2	0	2	0	0	1	1	2	2	1	1	1	3	2	2	0	2	1	1	1	0	0	0	0	0	3	2	1	0	1	2	2	1
Rossocoleus sakmara		2	0	2	2	2	2	0	0	2	1	2	2	1	1	0	3	2	2	1	2	0	2	1	?	1	0	1	0	3	?	1	0	1	2	2	1
Rossocoleus surijokovensis		2	0	2	2	0	2	0	0	2	1	2	2	1	1	1	3	2	2	1	2	1	1	1	0	1	0	1	0	3	1	1	0	1	2	2	1
Rossocoleus verrucosus		2	2	2	2	0	2	0	0	1	1	2	2	1	1	0	3	2	2	?	2	2	1	1	0	1	1	0	0	2	2	1	0	1	2	2	1
Aenigmocoleus uralensis		2	0	2	2	0	2	0	?	?	1	2	2	1	?	?	3	2	2	1	2	0	2	?	0	1	?	?	0	?	?	1	0	1	2	2	1
Pseudochrysomelites ovum		2	0	2	2	0	2	1	0	1	1	2	2	3	1	3	3	2	2	1	2	0	2	0	0	1	0	1	0	3	?	?	0	1	2	2	1
Schizocoleus glabrus		2	0	2	2	0	2	0	0	2	1	2	2	1	1	0	3	2	2	1	2	0	2	2	0	1	0	1	0	3	1	?	0	1	2	2	1
Schizocoleus kuznetskiensis		2	0	2	2	0	2	0	0	2	1	2	2	1	1	0	3	2	2	1	2	0	2	1	0	1	0	1	0	3	1	0	0	1	2	2	1
Schizocoleus longus		2	?	2	2	0	2	0	0	2	1	2	2	1	1	1	3	2	2	?	2	0	2	1	0	1	0	1	0	3	?	?	0	1	2	2	1
Schizocoleus major		2	2	2	2	0	2	0	0	2	1	2	2	1	1	2	3	2	2	1	2	0	2	1	0	1	0	1	0	3	1	0	0	1	2	2	1
Schizocoleus minimus		2	?	2	2	0	2	0	0	?	1	2	2	?	1	?	3	2	2	?	2	0	2	1	0	1	0	1	0	3	?	?	0	1	2	2	1
Schizocoleus robustus		2	?	2	2	0	2	0	0	1	1	2	2	?	1	?	3	2	2	?	2	0	2	1	0	1	0	1	0	3	1	1	0	1	2	2	1
Stegosyne rugosa		2	0	2	2	0	2	1	0	1	1	2	2	3	1	3	3	2	2	1	2	0	2	0	0	1	0	1	0	3	1	1	0	1	2	2	1
Uskatocoleus avitus		2	1	2	2	0	0	0	0	1	1	1	1	1	1	1	3	2	2	1	2	0	2	0	0	0	0	0	0	3	2	1	1	1	2	1	1
Uskatocoleus convexus		2	0	2	2	0	2	0	0	0	1	2	2	1	1	1	3	2	2	?	2	0	2	1	1	1	0	1	?	3	1	?	0	1	2	2	1
Uskatocoleus iljinskiensis		2	0	2	2	0	2	0	0	2	1	2	2	1	1	1	3	2	2	0	2	0	2	1	0	1	0	1	0	3	1	1	0	1	2	2	1
Uskatocoleus kaltanicus		2	2	2	2	0	2	0	0	1	1	2	2	1	1	0	3	2	2	1	2	0	2	1	0	1	0	0	0	3	2	1	0	1	2	2	1
Uskatocoleus kushejakovicus		2	1	2	2	0	2	0	0	1	1	2	2	1	1	0	3	2	2	1	2	0	2	1	0	0	0	1	0	3	1	1	0	1	2	2	1
Uskatocoleus surijokovicus		2	2	2	2	0	2	0	0	1	1	2	2	1	1	1	3	2	2	1	2	0	2	1	0	0	0	1	0	3	1	1	0	1	2	2	1
Sojanocoleus reticulatus		2	?	0	1	0	2	1	0	1	1	2	2	3	1	3	0	0	?	?	0	0	2	1	?	1	1	0	1	?	2	2	0	1	0	2	1
Taldycupes chachlovi		2	?	1	?	0	2	1	0	?	1	2	2	3	1	3	1	1	0	1	?	0	2	1	0	1	1	0	1	2	2	1	0	1	?	2	1
Taldycupes pingi		2	0	0	1	0	2	1	0	3	1	2	2	3	1	3	1	1	0	1	1	0	2	1	0	1	1	0	0	?	2	?	0	1	0	2	1
Tecticupes heckeri		2	0	0	1	0	2	1	0	3	1	2	2	3	1	3	1	1	0	1	1	0	2	1	0	1	0	1	1	3	?	2	0	1	0	2	1
Tecticupes indistinctus		2	2	1	?	0	2	1	0	3	1	2	2	3	1	3	1	1	0	1	?	0	2	1	0	1	1	0	1	2	2	2	0	1	?	2	1
Tecticupes martynovi		2	0	0	1	0	2	1	0	2	1	2	2	3	1	3	1	1	0	1	1	0	2	2	?	1	0	1	0	3	1	?	0	1	0	2	1
Tychticupes ussovi		2	?	0	1	0	2	1	0	?	1	2	2	3	1	3	1	1	?	?	?	0	2	1	0	1	0	1	?	3	1	?	0	1	1	2	1
Uskaticupes javorskyi		2	1	0	1	0	2	1	0	3	1	2	2	3	1	3	1	1	0	1	1	0	2	1	1	1	0	1	0	3	?	?	0	1	1	2	1
Uralocoleus ultimus		2	2	0	1	0	2	1	0	2	1	2	2	3	1	3	0	0	0	1	0	0	2	2	0	1	1	0	0	1	2	1	0	1	0	2	1
Elateridopsis permiensis		2	0	0	1	0	2	1	0	2	1	2	2	3	1	3	?	1	0	1	?	0	2	2	?	1	0	1	?	3	?	?	0	1	?	2	1
Schizophoridae indet. PIN, no. 3286/142	Aristov D S, Bashkuev A S, Golubev V K, et al. Fossil insects of the middle and upper Permian of European Russia[J]. Paleontological Journal, 2013, 47(7): 641-832.	2	2	2	2	0	2	1	0	1	1	2	2	3	1	3	3	2	2	1	2	0	2	1	?	?	0	1	?	3	?	?	0	1	2	2	1
Rossocoleus ellipticus		2	2	2	2	0	2	?	0	1	1	2	2	?	1	?	3	2	2	1	2	2	1	1	0	?	0	1	0	3	?	?	0	1	2	2	1
Permocrossos elongatus		2	1	2	2	0	0	1	0	2	0	1	1	3	1	3	3	2	2	1	2	0	2	0	1	1	1	0	0	?	2	?	1	1	2	1	1
Aenigmocoleus borissiaki		3	1	2	2	0	2	0	2	1	1	2	2	1	1	1	3	2	2	1	2	0	2	2	0	1	0	1	0	3	2	1	0	1	2	2	1
Taldycupes vasjuchitshevi		3	0	0	1	0	2	1	0	2	1	2	2	3	1	3	1	1	0	1	1	0	2	2	0	1	0	1	0	3	?	1	0	1	1	2	1
Ademosyne sibirica		3	1	2	2	0	0	1	0	1	0	1	0	3	1	3	3	2	2	1	2	0	2	0	1	0	0	1	0	3	1	1	1	1	2	1	1
Bicoleus laticella		3	0	0	1	0	2	1	0	2	1	2	2	3	1	3	0	0	1	1	1	0	2	0	0	1	1	0	0	0	2	?	0	1	0	2	1
Gondvanocoleus chikatunovi		3	1	0	1	0	2	1	0	2	1	2	2	3	1	3	1	0	1	1	1	0	2	1	0	1	1	0	0	2	2	1	0	1	0	2	1
Tetracoleus aristovi		3	?	1	1	0	2	1	0	?	1	2	2	3	1	3	1	1	?	?	?	0	2	1	0	1	0	1	0	3	1	1	0	1	0	2	1
Tetracoleus golubevi		3	1	1	?	0	2	1	0	2	1	2	2	3	1	3	?	1	?	?	?	0	2	1	?	1	0	1	0	3	?	?	0	1	?	2	1
Tetracoleus sennikovi		3	?	1	?	0	2	1	0	?	1	2	2	3	0	3	0	0	1	1	?	0	2	?	0	1	1	0	0	?	2	?	0	1	?	2	1
Tetracoleus tricoleoides		3	0	1	1	0	2	1	0	1	1	2	2	3	1	3	2	1	1	0	1	0	2	1	0	1	0	1	0	3	?	0	0	1	0	2	1
Tetracoleus vasilenkoi		3	2	1	1	0	2	1	0	2	1	2	2	3	1	3	1	1	1	1	1	0	2	1	0	1	0	1	0	3	1	1	0	1	?	2	1
Ichthyocupes skoki		3	?	0	1	0	2	1	0	2	1	2	2	3	1	3	0	0	?	?	?	0	2	2	1	1	0	1	1	3	0	2	0	1	0	2	1
Protocupoides acer		3	2	1	?	0	2	1	0	2	1	2	2	3	1	3	1	0	1	1	?	0	2	2	1	1	0	1	0	3	0	0	0	1	?	2	1
Protocupoides carinatus		3	0	0	1	0	2	1	0	2	1	2	2	3	1	3	0	0	?	?	0	0	2	1	0	1	0	1	0	3	1	1	0	1	?	2	1
Protocupoides esini		3	0	0	1	0	2	1	0	3	1	2	2	3	1	3	0	0	1	1	1	0	2	1	?	1	1	0	0	1	2	?	0	1	0	2	1
Artematopodites lozowskii		3	2	2	2	0	1	1	0	1	1	1	1	3	1	3	3	2	2	1	2	0	2	0	1	1	1	0	1	?	2	2	1	1	2	1	1
Dinoharpalus latus		3	2	2	2	0	0	1	0	1	?	1	1	3	1	3	3	2	2	1	2	0	2	0	1	1	0	0	0	3	2	1	?	1	2	?	1
Dinoharpalus martynovi		3	2	2	2	0	1	1	0	1	1	0	0	3	1	3	3	2	2	1	2	0	2	2	?	1	0	1	0	3	?	1	2	1	2	1	1
Hydrobiites permianus		3	0	2	2	0	1	1	0	?	?	?	1	3	1	3	3	2	2	?	2	0	2	1	?	1	0	1	0	3	1	1	?	1	2	?	1
Hydrobiites tillyardi		3	0	2	2	0	0	1	0	2	0	1	0	3	1	3	3	2	2	1	2	0	2	1	1	1	1	0	0	?	2	?	1	1	2	1	1
Hydrobiites vladimiri		3	2	2	2	0	0	1	0	1	0	1	0	3	1	3	3	2	2	1	2	0	2	0	1	1	1	0	0	?	2	?	1	1	2	1	1
Palademosyne natalensis		3	0	2	2	0	2	1	0	1	1	2	2	3	?	3	3	2	2	1	2	0	2	0	1	1	0	1	0	3	?	?	0	1	2	2	1
Permosyne affinis		3	2	2	2	0	1	1	0	0	0	?	0	3	1	3	3	2	2	?	2	0	2	0	?	?	?	?	0	?	?	?	1	1	2	1	1
Permosyne belmontensis		3	2	2	2	0	1	1	0	1	0	1	0	3	1	3	3	2	2	1	2	0	2	0	?	?	0	1	0	3	?	?	1	1	2	1	1
Permosyne dentata		3	0	2	2	0	0	1	0	1	0	1	0	3	0	3	3	2	2	1	2	0	2	0	0	1	1	0	0	2	2	1	2	1	2	1	1
Permosyne elongata		3	0	2	2	0	0	1	0	1	0	1	0	3	1	3	3	2	2	1	2	0	2	1	?	?	0	1	0	3	?	?	1	1	2	1	1
Tychtocoleus europeus		3	?	2	2	0	0	1	0	2	0	?	?	?	?	?	3	2	2	?	2	0	2	1	0	1	1	0	0	?	2	?	1	1	2	1	1
Permosyne mitchelli		3	0	2	2	0	0	1	0	1	0	1	0	3	1	3	3	2	2	?	2	0	2	0	?	?	0	1	0	3	?	?	1	1	2	1	1
Permosyne rasnitsyni		3	?	2	2	0	0	1	0	?	?	1	0	3	1	3	3	2	2	1	2	0	2	0	1	1	0	1	0	3	?	?	2	1	2	?	1
Permosynidae indet. PIN, no. 3446/67	Ponomarenko A G. New Beetles (Insecta, Coleoptera) from the Upper Vyatkian Aristovo Locality, European Russia[J]. Paleontological Journal, 2018, 52(6): 620-630.	3	?	2	2	0	0	1	0	?	?	?	?	3	1	3	3	2	2	?	2	0	2	1	?	?	1	0	0	0	2	1	?	1	2	?	1
Tychtocoleus neuburgae		3	2	2	2	0	0	1	0	1	1	1	1	3	1	3	3	2	2	1	2	0	2	1	0	1	0	1	0	3	1	1	1	1	2	1	1
Tychtocoleus popovi		3	0	2	2	0	1	1	0	1	?	1	1	3	1	3	3	2	2	1	2	0	2	1	1	1	1	0	0	2	2	1	?	1	2	?	1
Polysitum kuznetskiense		3	0	2	2	0	0	0	0	1	1	?	1	1	1	1	3	2	2	1	2	0	2	0	0	1	0	1	0	3	0	1	1	1	2	1	1
Ponomarenkium belmonthense		3	2	2	2	0	0	1	0	0	?	?	0	3	1	3	3	2	2	1	2	0	2	1	1	1	0	1	0	3	?	1	1	1	2	1	1
Erunakicupes angustus		3	0	2	2	0	0	0	0	1	0	1	1	1	1	0	3	2	2	1	2	0	2	2	?	?	0	1	0	3	?	?	2	1	2	0	1
Erunakicupes fomitshevi		3	0	2	2	1	2	?	0	1	1	2	2	?	1	?	3	2	2	?	2	0	2	0	1	1	1	0	1	2	2	2	0	1	2	2	1
Erunakicupes grossus		3	?	2	2	0	0	0	0	1	0	1	1	1	1	0	3	2	2	?	2	0	2	1	?	?	0	1	0	3	?	?	2	1	2	0	1
Erunakicupes kryshtofovichi		3	1	2	2	2	2	0	0	2	1	2	2	1	1	1	3	2	2	?	2	0	2	1	?	?	0	1	0	3	1	1	0	1	2	2	1
Erunakicupes schmalhauseni		3	2	2	2	0	0	1	0	1	0	?	?	3	1	3	3	2	2	1	2	0	2	2	0	1	0	1	0	3	1	1	2	1	2	0	1
Karakanocoleus magnus		3	0	2	2	0	0	0	0	2	?	?	0	1	1	0	3	2	2	0	2	0	2	1	0	1	0	1	0	3	1	1	2	1	2	?	1
Karakanocoleus major		3	0	2	2	0	2	0	0	1	1	2	2	1	1	1	3	2	2	0	2	0	2	1	0	1	0	1	0	3	1	1	0	1	2	2	1
Karakanocoleus mutovinensis		3	1	2	2	0	0	0	0	?	0	1	1	1	1	1	3	2	2	1	2	0	2	1	?	1	0	1	0	3	?	?	2	1	2	1	1
Karakanocoleus pincombeae		3	2	2	2	0	0	0	0	0	0	?	1	1	1	0	3	2	2	?	2	0	2	1	?	?	0	1	0	3	?	?	1	1	2	1	1
Karakanocoleus striatus		3	2	2	2	0	2	0	?	1	1	2	2	1	1	1	3	2	2	0	2	0	2	1	0	1	0	1	1	3	1	2	0	0	2	2	1
Karakanocoleus venjukovi		3	2	2	2	0	0	0	0	1	0	1	1	3	1	3	3	2	2	1	2	0	2	1	0	1	0	1	0	3	1	1	2	1	2	0	1
Rhombocoleites danutae		3	0	2	2	0	0	0	0	2	?	?	1	1	1	0	3	2	2	1	2	0	2	2	?	?	0	1	0	3	?	?	?	1	2	1	1
Rhombocoleus andreae		3	0	2	2	0	0	0	0	1	?	0	0	1	1	1	3	2	2	1	2	0	2	2	1	1	0	1	0	3	1	1	2	1	2	?	1
Rossocoleus aristovi		3	2	2	2	1	2	0	0	1	1	2	2	1	1	0	3	2	2	1	2	0	2	1	?	?	0	1	0	3	?	1	0	1	2	2	1
Metrorhynchites angustior		3	0	2	2	0	2	0	0	2	1	2	2	1	1	0	3	2	2	1	2	0	2	2	0	1	0	1	0	3	1	1	0	1	2	2	1
Metrorhynchites angustus		3	1	2	2	0	2	0	0	1	1	2	2	1	1	0	3	2	2	1	2	0	2	2	0	1	0	1	0	3	1	1	0	1	2	2	1
Metrorhynchites baculum		3	?	2	2	0	2	0	0	2	1	2	2	1	1	0	3	2	2	?	2	0	2	1	0	1	0	1	1	3	1	2	0	1	2	2	1
Metrorhynchites elongatus		3	0	2	2	0	2	0	0	2	1	2	2	1	1	0	3	2	2	1	2	0	2	2	0	1	0	1	0	3	?	1	0	1	2	2	1
Metrorhynchites longus		3	0	2	2	0	2	0	1	2	1	2	2	1	1	0	3	2	2	1	2	0	2	2	0	1	0	1	0	3	1	1	0	1	2	2	1
Pseudochrysomelites bashkuevi		3	0	2	2	0	2	0	0	1	1	2	2	1	1	0	3	2	2	1	2	0	2	0	1	1	0	1	0	3	1	1	0	1	2	2	1
Pseudochrysomelites circumflexus		3	0	2	2	0	2	1	0	1	1	2	2	3	1	3	3	2	2	1	2	0	2	0	?	1	0	1	0	3	1	1	0	1	2	2	1
Pseudochrysomelites convexus		3	0	2	2	0	2	1	0	1	1	2	2	3	1	3	3	2	2	1	2	0	2	0	?	1	0	0	0	3	2	1	0	1	2	2	1
Pseudochrysomelites dvinensis		3	0	2	2	0	2	1	0	2	1	2	2	3	1	3	3	2	2	0	2	0	2	0	1	1	1	0	1	2	2	2	0	1	2	2	1
Pseudochrysomelites latissimus		3	0	2	2	0	2	1	0	2	1	2	2	3	1	3	3	2	2	1	2	0	2	0	?	1	0	1	0	3	1	1	0	1	2	2	1
Pseudochrysomelites latum		3	0	2	2	0	2	1	0	1	1	2	2	3	1	3	3	2	2	1	2	0	2	0	?	?	?	?	?	?	?	?	0	1	2	2	1
Pseudochrysomelites longus		3	0	2	2	0	2	0	0	1	1	2	2	1	1	0	3	2	2	1	2	0	2	1	1	1	0	1	0	3	?	?	0	1	2	2	1
Pseudochrysomelites medialis		3	0	2	2	0	2	0	0	1	1	2	2	1	1	0	3	2	2	1	2	0	2	1	1	1	0	1	0	3	?	?	0	1	2	2	1
Pseudochrysomelites sphenoidalis		3	0	2	2	0	2	0	0	0	1	2	2	1	1	2	3	2	2	1	2	0	2	0	1	1	0	1	0	3	1	1	0	1	2	2	1
Schizocoleidae indet. Ponomarenko 2004	Ponomarenko A G. Beetles (Insecta, Coleoptera) of the late Permian and early Triassic[J]. Paleontological Journal, 2004, 38(Suppl 2): S185-S196.	3	?	2	2	0	2	?	0	2	1	2	2	?	1	?	3	2	2	?	2	0	2	?	0	1	?	?	?	?	?	?	0	1	2	2	1
Schizocoleus depressus		3	2	2	2	0	2	0	0	2	1	2	2	1	1	0	3	2	2	1	2	0	2	0	0	1	0	1	0	3	?	1	0	1	2	2	1
Uskatocoleus artus		3	2	2	2	0	2	0	0	1	1	2	2	1	1	0	3	2	2	1	2	0	2	1	0	1	0	1	0	3	1	?	0	1	2	2	1
Uskatocoleus ponomarenkoi		3	1	2	2	0	2	0	0	1	1	2	2	1	1	0	3	2	2	1	2	0	2	0	1	1	0	1	0	3	1	1	0	1	2	2	1
Uskatocoleus eurypygus		3	2	2	2	0	2	0	0	3	1	2	2	2	1	1	3	2	2	1	2	0	2	0	0	1	0	1	0	3	?	?	0	1	2	2	1
Uskatocoleus foveolatus		3	1	2	2	0	2	0	0	1	1	2	2	1	1	1	3	2	2	1	2	0	2	0	0	1	0	1	0	3	1	1	0	1	2	2	1
Uskatocoleus hirsutus		3	1	2	2	0	2	1	0	1	1	2	2	3	1	3	3	2	2	1	2	0	2	0	1	1	0	1	1	3	1	2	0	1	2	2	1
Uskatocoleus lutugini		3	0	2	2	0	2	0	0	1	1	2	2	1	1	0	3	2	2	1	2	0	2	0	1	1	0	1	0	3	1	1	0	1	2	2	1
Uskatocoleus micron		3	0	2	2	0	2	0	0	2	1	2	2	1	1	0	3	2	2	1	2	0	2	1	1	1	0	1	1	3	1	2	0	1	2	2	1
Uskatocoleus minimus		3	?	2	2	0	2	0	0	0	1	2	2	0	1	0	3	2	2	?	2	0	2	0	0	1	0	1	0	3	1	1	0	1	2	2	1
Uskatocoleus minor		3	0	2	2	0	2	0	0	1	1	2	2	1	1	0	3	2	2	1	2	0	2	1	1	1	0	0	0	3	2	1	0	1	2	2	1
Uskatocoleus rhynchophorus		3	0	2	2	0	2	0	0	1	1	2	2	1	1	0	3	2	2	1	2	0	2	1	0	1	0	1	0	3	1	?	0	1	2	2	1
Uskatocoleus sukhonensis		3	2	2	2	0	2	0	0	2	1	2	2	1	1	0	3	2	2	1	2	0	2	0	1	1	0	1	0	3	?	?	0	1	2	2	1
Uskatocoleus uralensis		3	0	2	2	0	2	0	0	1	1	2	2	0	1	0	3	2	2	1	2	0	2	1	0	1	0	0	?	3	2	?	0	1	2	2	1
Uskatocoleus zalesskyi		3	0	2	2	0	?	0	0	2	1	1	1	0	1	0	3	2	2	1	2	0	2	1	0	1	0	1	0	3	1	0	1	1	2	1	1
Afrotaldycupes africanus		3	0	1	1	0	2	1	0	1	1	2	2	3	1	3	0	1	?	1	?	0	2	1	?	1	0	1	0	3	?	?	0	1	1	2	1
Afrotaldycupes lidgettoniensis		3	0	1	1	0	2	1	0	2	1	2	2	3	1	3	0	1	?	1	?	0	2	1	?	1	0	1	0	3	?	1	0	1	1	2	1
Proterocupes major		3	?	0	?	0	2	1	0	?	1	2	2	3	1	3	1	1	?	?	?	0	2	1	0	1	0	1	?	3	1	?	0	1	?	2	1
Proterocupes nedubrovensis		3	0	1	1	0	2	1	0	1	1	2	2	3	1	3	1	1	0	1	1	0	2	0	0	1	0	1	0	3	0	?	0	1	1	2	1
Proterocupes permiana		3	1	0	1	0	2	1	0	1	1	2	2	3	1	3	1	1	0	1	1	0	2	0	?	1	0	1	0	3	?	?	0	1	1	2	1
Taldycupes bergi		3	2	0	?	0	2	1	0	1	1	2	2	3	1	3	0	1	0	1	?	0	2	1	1	1	0	1	0	3	?	?	0	1	?	2	1
Taldycupes cellulosus		3	?	0	1	0	2	1	0	2	1	2	2	3	1	3	0	1	?	?	?	0	2	1	0	1	0	1	0	3	0	0	0	1	0	2	1
Taldycupes khalfini		3	1	1	1	0	2	1	0	1	1	2	2	3	1	3	0	1	0	1	1	0	2	1	1	1	0	1	1	3	1	2	0	1	0	2	1
Taldycupes moltshanovi		3	0	0	1	0	2	1	0	1	1	2	2	3	1	3	1	1	0	1	1	0	2	0	0	1	0	0	1	3	2	2	0	1	0	2	1
Taldycupes reticulatus		3	2	0	1	0	2	1	0	2	1	2	2	3	?	3	1	1	0	1	?	0	2	1	?	1	0	1	1	3	?	2	0	1	0	2	1
Taldycupes rosanovi		3	0	0	1	0	2	1	0	1	1	2	2	3	1	3	1	1	0	1	1	0	2	0	?	1	0	1	1	3	?	2	0	1	0	2	1
Tychticupes beljanini		3	1	1	1	0	2	1	0	1	1	2	2	3	1	3	1	1	0	1	1	0	2	0	0	1	0	1	1	3	1	2	0	1	0	2	1
Tychticupes radtshenkoi		3	0	0	1	0	2	1	0	1	1	2	2	3	1	3	1	1	0	1	?	0	2	1	0	1	1	0	0	1	2	1	0	1	0	2	1
Tychticupes ragozini		3	?	1	1	0	2	1	0	?	1	2	2	3	?	3	1	1	0	1	?	0	2	?	1	1	?	?	0	?	?	1	0	1	?	2	1
Tychticupoides grjazevi		3	?	0	?	0	2	1	0	?	1	2	2	3	1	3	1	1	?	?	?	0	2	?	0	1	?	?	0	?	?	1	0	1	?	2	1
Permunda nana		3	0	2	2	0	1	1	0	2	1	?	0	3	1	3	3	2	2	1	2	0	2	1	?	?	?	?	?	?	?	?	1	1	2	1	1
Petrodromeus asiaticus		3	0	2	2	0	1	1	0	1	1	0	0	3	1	3	3	2	2	1	2	0	2	0	1	1	1	0	0	2	2	1	1	1	2	1	1
Petrodromeus minor		3	0	2	2	0	1	1	0	2	1	0	0	3	1	3	3	2	2	1	2	0	2	1	?	1	1	0	0	2	2	1	1	1	2	1	1
Tunguskagyrus planus		3	0	2	2	0	2	1	0	0	1	2	2	3	1	3	3	2	2	1	2	0	2	1	1	1	?	?	?	?	?	?	0	1	2	2	1
Tunguskagyrus sibiricus		3	0	2	2	0	2	1	0	0	1	2	2	3	1	3	3	2	2	1	2	0	2	1	1	1	?	?	?	?	?	?	0	1	2	2	1
Tetracoleus meyeni		3	?	1	?	0	2	1	0	?	1	2	2	3	1	3	1	1	?	?	?	0	2	1	0	1	0	1	?	3	?	?	0	1	?	2	1
Archaeomalthus synoriakos		3	2	2	2	0	2	1	0	2	1	2	2	3	1	3	3	2	2	1	2	0	2	0	1	1	?	?	0	?	?	?	0	1	2	2	1
Pseudochrysomelites elongatus		4	0	2	2	0	2	1	0	2	1	2	2	3	1	3	3	2	2	1	2	0	2	0	?	?	0	1	0	3	?	?	0	1	2	2	1
Pseudochrysomelites humeralis		4	0	2	2	0	2	1	0	2	1	2	2	3	1	3	3	2	2	1	2	0	2	0	?	?	1	0	?	?	2	?	0	1	2	2	1
Pseudorhynchophora convexa		4	0	2	2	0	2	1	3	1	1	2	2	3	1	3	3	2	2	1	2	0	2	0	1	0	1	0	0	?	2	?	0	1	2	2	1
Schizocoleus septentrionalis		4	1	2	2	0	2	0	0	2	1	2	2	1	1	0	3	2	2	1	2	0	2	1	0	1	0	1	0	3	?	?	0	1	2	2	1
Schizocoleus triassicus		4	0	2	2	0	2	1	0	2	1	2	2	3	1	3	3	2	2	1	2	0	2	0	1	1	0	1	1	3	?	2	0	1	2	2	1
Pseudochrysomelites tumidus		4	0	2	2	0	2	1	0	2	1	2	2	3	1	3	3	2	2	1	2	0	2	0	?	?	0	0	1	3	2	2	0	1	2	2	1
Ademosyne bacca		5	0	2	2	0	0	1	0	1	?	?	0	3	1	3	3	2	2	1	2	0	2	?	1	0	0	1	0	3	?	?	?	1	2	?	1
Ademosyne elliptica		5	?	2	2	0	0	1	0	2	?	?	0	3	1	3	3	2	2	1	2	0	2	1	1	0	?	?	?	?	?	?	?	1	2	?	1
Ademosyne kirghizica		5	0	2	2	0	0	1	0	2	?	?	0	3	1	3	3	2	2	1	2	0	2	2	1	0	0	1	0	3	?	?	?	1	2	?	1
Ademosyne wianamattensis		5	1	2	2	0	0	1	0	0	1	1	0	3	1	3	3	2	2	1	2	0	2	1	1	1	1	0	0	?	2	?	1	1	2	1	1
Cephalosyne capitata		5	0	2	2	0	0	1	0	2	?	?	0	3	1	3	3	2	2	1	2	0	2	1	?	?	0	1	0	3	?	?	?	1	2	?	1
Dolichosyne confragosa		5	0	2	2	0	0	1	0	2	0	0	0	3	1	3	3	2	2	1	2	0	2	2	1	1	0	1	0	3	?	?	1	1	2	1	1
Dolichosyne rostrata		5	0	2	2	0	0	1	0	2	?	1	0	3	1	3	3	2	2	1	2	0	2	1	1	1	0	1	0	3	?	?	1	1	2	1	1
Dolichosyne sulcata		5	0	2	2	0	0	1	0	2	0	0	0	3	1	3	3	2	2	1	2	0	2	2	1	1	0	1	0	3	?	?	1	1	2	1	1
Clathrocupes anthrilegnotos		5	0	0	1	0	2	1	0	1	1	2	2	3	1	3	1	1	0	1	1	0	2	1	1	1	1	0	0	1	2	1	0	1	1	2	1
Sogdelytron tristichus		5	2	?	1	0	2	1	0	1	1	2	2	3	1	3	1	0	0	1	0	0	2	0	0	1	0	1	0	3	1	1	0	1	?	2	1
Tetracoleus minimus		5	2	1	1	0	2	1	0	1	1	2	2	3	1	3	?	0	0	1	?	0	2	2	0	1	0	1	1	3	?	2	0	1	?	2	1
Tetracoleus tshalyshevi		5	0	1	1	0	2	1	0	3	1	2	2	3	1	3	0	0	0	0	1	0	2	1	0	1	0	1	1	3	?	2	0	1	1	2	1
Triassocupes yaochaensis		5	0	?	1	0	2	1	0	1	1	2	2	3	1	3	?	0	?	?	0	0	2	1	0	1	0	1	0	3	1	1	0	1	?	2	1
Tricoleodes acutus		5	1	0	1	0	2	1	0	2	1	2	2	3	1	3	2	0	0	0	1	0	2	1	?	1	1	0	0	2	2	?	0	1	0	2	1
Tricoleodes longus		5	?	1	1	0	2	1	0	2	1	2	2	3	1	3	?	0	0	0	1	0	2	0	?	1	1	0	0	2	2	1	0	1	?	2	1
Sogdelytron latum		5	1	0	1	0	2	1	0	2	1	2	2	3	1	3	0	0	0	0	0	0	2	0	?	1	0	1	0	3	1	?	0	1	0	2	1
Adelidium cordatum		5	?	2	2	0	0	1	0	0	1	?	0	3	1	3	3	2	2	1	2	0	2	0	?	?	0	1	0	3	?	?	1	1	2	1	1
Coleoptera indet. 82TH6-1 T222	van Eldijk T, Goris G, Haarhuis A, et al. New fossil insects from the Anisian (lower to middle Muschelkalk) from the central European Basin (Germany and the Netherlands)[J]. PalZ, 2017, 91(2): 185-194.	5	0	2	2	0	2	1	0	1	1	2	2	3	1	3	3	2	2	1	2	0	2	0	1	0	0	1	?	3	?	?	0	1	2	2	1
Coleoptera indet. AHWW-0221	Y. C. Hong. 2007. Midtriassic new genera and species of Mesopanorpodidae (Insecta, Mecoptera) from Shaanxi, China. Acta Zootaxonomica Sinica 32(2):261-267	5	0	2	2	0	2	0	0	1	1	2	2	1	1	0	3	2	2	1	2	0	2	1	?	?	0	1	0	3	1	1	0	1	2	2	1
Stargelytron altus		5	0	2	2	0	2	1	0	1	1	2	2	3	1	3	3	2	2	1	2	0	2	0	?	?	0	1	?	3	?	?	0	1	2	2	1
Asimma rara		5	0	1	?	0	2	1	0	2	1	2	2	3	1	3	?	1	?	1	?	0	2	2	?	1	0	1	?	3	1	?	0	1	?	2	1
Kirghizocupes cellulosus		5	0	1	1	0	2	1	0	1	1	2	2	3	1	3	1	1	0	1	1	0	2	2	?	1	1	0	0	0	2	?	0	1	1	2	1
Kirghizocupes indistinctus		5	0	0	1	0	2	1	0	1	1	2	2	3	1	3	1	1	0	1	1	0	2	2	?	1	1	0	0	0	2	?	0	1	1	2	1
Kirghizocupes proporeius		5	0	0	1	0	2	1	0	1	1	2	2	3	1	3	1	1	0	1	1	0	2	2	?	1	1	0	0	?	2	?	0	1	1	2	1
Pterocupes antennatus		5	0	?	?	0	2	1	0	2	1	2	2	3	1	3	?	1	?	1	?	0	2	2	?	1	1	0	?	0	2	?	0	1	?	2	1
Pterocupes leptocerus		5	0	?	?	0	2	1	0	2	1	2	2	3	1	3	?	1	0	1	?	0	2	1	?	1	1	0	?	0	2	?	0	1	1	2	1
Etheridgea petrica		5	0	2	2	0	2	?	0	1	1	2	2	?	1	?	3	2	2	1	2	2	?	1	0	1	0	1	0	3	?	?	0	1	2	2	1
Guillermia lecticula		5	?	2	2	0	0	1	0	2	?	0	0	3	1	3	3	2	2	1	2	0	2	2	1	1	0	1	?	3	?	?	1	1	2	1	1
Obrienia illaetabilis		5	0	2	2	0	0	1	0	2	?	0	0	3	1	3	3	2	2	1	2	0	2	2	1	1	0	1	?	3	?	?	1	1	2	1	1
Obrienia ingurgata		5	0	2	2	0	0	1	0	1	?	0	0	3	1	3	3	2	2	1	2	0	2	2	1	1	0	1	?	3	?	?	1	1	2	1	1
Obrienia kuscheli		5	0	2	2	0	0	1	0	1	1	0	0	3	1	3	3	2	2	1	2	0	2	1	1	1	0	1	0	3	?	?	1	1	2	1	1
Obrieniidae indet. Zherikhin and Gratshev 1723/591	V. V. Zherikhin and V. G. Gratshev. 1993. Obrieniidae, fam. nov., the oldest Mesozoic weevils (Coleoptera, Curculionoidea). Paleontological Journal 27(1A):50-68	5	0	2	2	0	0	1	0	2	?	0	0	3	1	3	3	2	2	1	2	0	2	2	1	1	0	1	?	3	?	?	1	1	2	1	1
Obrieniidae indet. Zherikhin and Gratshev 2070/1501	V. V. Zherikhin and V. G. Gratshev. 1993. Obrieniidae, fam. nov., the oldest Mesozoic weevils (Coleoptera, Curculionoidea). Paleontological Journal 27(1A):50-68	5	0	2	2	0	0	1	0	2	?	0	0	3	1	3	3	2	2	1	2	0	2	2	1	1	0	1	?	3	?	?	1	1	2	1	1
Obrieniidae indet. Zherikhin and Gratshev 2785/2360	V. V. Zherikhin and V. G. Gratshev. 1993. Obrieniidae, fam. nov., the oldest Mesozoic weevils (Coleoptera, Curculionoidea). Paleontological Journal 27(1A):50-68	5	0	2	2	0	0	1	0	2	1	0	0	3	1	3	3	2	2	1	2	0	2	2	1	1	0	1	0	3	?	?	1	1	2	1	1
Madygenorhynchus multifidus		5	0	2	2	0	0	1	0	2	?	0	0	3	1	3	3	2	2	1	2	0	2	2	1	1	?	?	?	?	?	?	1	1	2	?	1
Notocupoides capitatus		5	?	?	1	0	2	1	0	2	1	2	2	3	1	3	1	0	0	?	1	0	2	1	?	1	1	0	?	0	2	?	0	1	1	2	1
Notocupoides fasciatus		5	0	?	1	0	2	1	0	3	1	2	2	3	1	3	1	0	0	1	1	0	2	2	?	1	1	0	?	0	2	?	0	1	1	2	1
Notocupoides triassicus		5	0	0	1	0	2	1	0	2	1	2	2	3	1	3	0	0	0	1	1	0	2	2	?	1	1	0	0	0	2	?	0	1	1	2	1
Zygadenia shiluoensis		5	0	0	1	0	2	1	0	1	1	2	2	3	1	3	1	0	0	1	1	0	2	1	0	1	0	1	0	3	1	1	0	1	1	2	1
Lithocupes gigas		5	?	0	1	0	2	1	0	2	1	2	2	3	1	3	1	0	?	?	?	0	2	1	0	1	1	0	?	0	2	?	0	1	1	2	1
Lithocupes incertus		5	2	1	1	0	2	1	0	1	1	2	2	3	1	3	1	0	0	1	1	0	2	2	?	1	1	0	?	2	2	?	0	1	1	2	1
Lithocupes punctatus		5	0	1	1	0	2	1	0	1	1	2	2	3	1	3	1	0	0	1	1	0	2	1	?	1	1	0	0	0	2	1	0	1	1	2	1
Notocupes .Sp MCSN 5002	KRZEMINSKI W, LOMBARDO C. NEW FOSSIL, EPHEMIEROPTERA AND COLEOPTERA FROM THE LADINIAN[J]. Rivista Italiana di Paleontologia e Stratigrafia, 2001, 107(1): 69-78.	5	2	1	1	0	2	1	0	1	1	2	2	3	1	3	1	1	0	1	?	0	2	1	0	1	?	?	?	?	?	?	0	1	1	2	1
Rhabdocupes baculatus		5	2	0	1	0	2	1	0	1	1	2	2	3	1	3	1	0	0	1	1	0	2	2	?	1	1	0	?	0	2	?	0	1	1	2	1
Rhabdocupes longus		5	0	1	?	0	2	1	0	2	1	2	2	3	1	3	?	0	?	1	?	0	2	2	?	1	1	0	?	0	2	?	0	1	?	2	1
Rhabdocupes minor		5	0	1	1	0	2	1	0	2	1	2	2	3	1	3	1	0	0	1	1	0	2	2	?	1	1	0	?	0	2	?	0	1	1	2	1
Zygadenia laticella		5	0	0	1	0	2	1	0	1	1	2	2	3	1	3	1	0	0	1	1	0	2	2	?	1	1	0	0	0	2	?	0	1	1	2	1
Zygadenia rostrata		5	0	1	1	0	2	1	0	2	1	2	2	3	1	3	1	0	0	1	1	0	2	1	?	1	1	0	?	0	2	?	0	1	1	2	1
Zygadenia tenuis		5	2	?	1	0	2	1	0	2	1	2	2	3	1	3	1	0	0	1	1	0	2	1	?	1	1	0	?	0	2	?	0	1	1	2	1
Gnathopeltos dixis		5	2	2	2	0	0	1	0	1	?	?	0	3	1	3	3	2	2	1	2	0	2	1	?	?	0	1	0	3	1	1	?	1	2	?	1
Peltosyne triassica		5	0	2	2	0	0	1	0	0	0	0	0	3	1	3	3	2	2	1	2	0	2	0	1	0	1	1	0	?	?	?	2	1	2	1	1
Peltosyne varyvrosa		5	?	2	2	0	0	1	0	1	0	?	?	3	1	3	3	2	2	?	2	0	2	1	1	0	1	1	0	1	?	1	1	1	2	1	1
Ofthalmopeltos synkritos		5	0	2	2	0	0	1	0	2	?	?	0	3	1	3	3	2	2	?	2	0	2	1	?	?	0	1	0	3	?	?	?	1	2	?	1
Frankencupes ultimus		5	1	0	1	0	2	1	0	2	1	2	2	3	1	3	0	0	0	1	1	0	2	0	0	1	1	0	?	1	2	?	0	1	0	2	1
Delpuentesyne menendezi		5	0	2	2	0	0	1	0	2	?	?	0	3	1	3	3	2	2	1	2	0	2	2	1	1	?	?	?	?	?	?	2	1	2	1	1
Metrorhynchites angustum		5	0	2	2	0	2	1	0	0	1	2	2	3	1	3	3	2	2	1	2	0	2	2	0	1	0	0	0	3	2	1	0	1	2	2	1
Metrorhynchites dunstani		5	0	2	2	0	?	1	0	?	?	1	1	3	1	3	3	2	2	1	2	0	2	?	0	1	?	?	?	?	?	?	1	1	2	?	1
Metrorhynchites grandis		5	0	2	2	0	2	?	0	?	1	2	2	?	1	?	3	2	2	1	2	0	2	?	0	1	0	0	0	3	2	?	0	0	2	2	1
Metrorhynchites sydneiensis		5	?	2	2	0	2	1	0	2	1	2	2	3	1	3	3	2	2	?	2	0	2	2	0	1	?	?	?	?	?	?	0	0	2	2	1
Pseudochrysomelites anser		5	0	2	2	0	2	0	0	0	1	2	2	1	1	0	3	2	2	1	2	0	2	1	1	0	0	1	0	3	?	?	0	1	2	2	1
Pseudochrysomelites dilatatus		5	0	2	2	0	2	1	0	2	1	2	2	3	1	3	3	2	2	1	2	0	2	0	1	0	0	1	0	3	?	?	0	1	2	2	1
Pseudochrysomelites planus		5	0	2	2	0	2	1	0	2	1	2	2	3	1	3	3	2	2	1	2	0	2	0	1	0	0	1	0	3	1	1	0	1	2	2	1
Stegosyne borealis		5	2	2	2	0	2	1	0	2	1	2	2	3	1	3	3	2	2	1	2	0	2	0	0	0	0	1	0	3	1	1	0	1	2	2	1
Lethocoleus sternalis		5	0	2	2	0	2	?	0	2	1	2	2	?	1	?	3	2	2	1	2	0	2	2	0	1	0	1	0	3	?	?	0	1	2	2	1
Catabrycus hoplites		5	0	2	2	0	2	?	0	2	1	2	2	?	1	?	3	2	2	1	2	0	2	2	?	?	0	1	0	3	?	?	0	1	2	2	1
Hadeocoleus catachtonius		5	0	2	2	0	2	?	0	2	1	2	2	?	1	?	3	2	2	1	2	0	2	2	?	?	?	?	0	?	?	?	0	1	2	2	1
Hadeocoleus gigas		5	0	2	2	0	2	1	0	2	1	2	2	3	1	3	3	2	2	1	2	0	2	2	0	1	1	0	0	2	2	1	0	1	2	2	1
Pesus prognathus		5	?	2	2	0	2	?	0	1	1	2	2	?	1	?	3	2	2	1	2	0	2	0	?	?	?	?	?	?	?	?	0	1	2	2	1
Praesagus capitatus		5	0	2	2	0	2	?	0	1	1	2	2	?	1	?	3	2	2	1	2	0	2	1	?	?	0	1	0	3	1	1	0	1	2	2	1
Salebroferus asper		5	0	2	2	0	2	0	0	1	1	2	2	1	1	1	3	2	2	?	2	0	2	0	0	1	0	1	0	3	?	?	0	1	2	2	1
Salebroferus confragosus		5	0	2	2	0	2	?	0	2	1	2	2	?	1	?	3	2	2	1	2	0	2	1	?	?	?	?	0	?	?	?	0	1	2	2	1
Schizophorinus punctatus		5	0	2	2	0	2	?	0	2	1	2	2	?	1	?	3	2	2	1	2	0	2	2	?	?	0	1	0	3	?	?	0	1	2	2	1
Schizophoroides glaber		5	0	2	2	0	2	0	0	2	1	2	2	1	1	0	3	2	2	1	2	0	2	1	?	?	0	1	0	3	?	?	0	1	2	2	1
Schizophoroides rugosus		5	0	2	2	0	2	?	0	2	1	2	2	?	1	?	3	2	2	1	2	0	2	2	?	?	?	?	?	?	?	?	0	1	2	2	1
Schizophoroides tuberculatus		5	0	2	2	0	2	?	0	2	1	2	2	?	1	?	3	2	2	1	2	0	2	2	?	?	?	?	?	?	?	?	0	1	2	2	1
Thnesidius xyphophorus		5	2	2	2	0	2	?	0	1	1	2	2	?	1	?	3	2	2	1	2	0	2	1	?	?	0	1	0	3	?	1	0	1	2	2	1
Triassocoleus sulcatus		5	0	2	2	0	2	?	0	2	1	2	2	?	1	?	3	2	2	1	2	0	2	1	0	1	?	?	?	?	?	?	0	1	2	2	1
Triassocoleus tortulosus		5	0	2	2	0	2	?	0	2	1	2	2	?	1	?	3	2	2	1	2	0	2	1	0	1	?	?	?	?	?	?	0	1	2	2	1
Cupesia monilicornia		5	0	?	?	0	2	1	0	1	1	2	2	3	1	3	?	?	?	1	?	0	2	0	?	1	1	0	?	0	2	?	0	1	?	2	1
Cupesia sepulta		5	0	0	1	0	2	1	0	1	1	2	2	3	1	3	1	0	0	1	1	0	2	1	?	1	1	0	0	0	2	?	0	1	1	2	1
Cupesia serricornia		5	0	0	1	0	2	1	0	2	1	2	2	3	1	3	1	0	0	1	1	0	2	2	?	1	1	0	0	0	2	1	0	1	1	2	1
Platycupes dolichocerus		5	0	0	1	0	2	1	0	2	1	2	2	3	1	3	1	1	0	1	1	0	2	0	?	1	1	0	?	0	2	?	0	1	1	2	1
Platycupes major		5	?	0	1	0	2	1	0	?	1	2	2	3	1	3	1	1	?	?	1	0	2	0	?	1	1	0	?	0	2	?	0	1	1	2	1
Platycupes pusillus		5	0	0	1	0	2	1	0	1	1	2	2	3	1	3	1	1	0	1	1	0	2	1	?	1	?	?	?	?	?	?	0	1	1	2	1
Platycupes reticulatus		5	0	0	1	0	2	1	0	1	1	2	2	3	1	3	1	1	0	1	1	0	2	1	?	1	?	?	?	?	?	?	0	1	1	2	1
Platycupes sogdianus		5	2	0	1	0	2	1	0	2	1	2	2	3	1	3	1	1	0	1	1	0	2	1	?	1	1	0	0	0	2	?	0	1	1	2	1
Procupes mandibularis		5	0	1	1	0	2	1	0	2	1	2	2	3	1	3	?	1	0	1	?	0	2	2	?	1	1	0	?	0	2	?	0	1	?	2	1
Triadocupes ellipticus		5	?	0	1	0	2	1	0	2	1	2	2	3	1	3	?	1	0	1	1	0	2	0	?	1	1	0	?	0	2	?	0	1	?	2	1
Triadocupes ferghanensis		5	0	0	1	0	2	1	0	1	1	2	2	3	1	3	1	1	0	1	1	0	2	0	?	1	1	0	0	0	2	?	0	1	1	2	1
Triadocupes latus		5	0	0	1	0	2	1	0	1	1	2	2	3	1	3	1	1	0	1	1	0	2	0	?	1	1	0	?	0	2	?	0	1	1	2	1
Avocatinus elongatus		5	2	2	2	0	2	1	0	2	1	2	2	3	1	3	3	2	2	1	2	0	2	2	0	1	0	1	0	3	?	?	0	1	2	2	1
Catinoides rotundatus		5	0	2	2	0	2	1	0	2	1	2	2	3	1	3	3	2	2	?	2	0	2	0	?	?	0	1	?	3	1	?	0	1	2	2	1
Macrocatinius brachycephalus		5	0	2	2	0	2	1	0	2	1	2	2	3	1	3	3	2	2	1	2	0	2	1	?	?	0	1	0	3	?	?	0	1	2	2	1
Triaplidae indet. 2905/24	Kirejtshuk A G, Prokin A A. The position of the Palaeozoic genus Tunguskagyrus Yan, Beutel et Lawrence in the family Triaplidae sensu n.(Coleoptera, Archostemata: Schizophoroidea)[J]. Entomological Review, 2018, 98(7): 872-882.	5	?	2	2	0	2	1	0	2	1	2	2	3	1	3	3	2	2	?	2	0	2	2	1	0	0	1	0	3	1	?	0	1	2	2	1
Triaplus macroplatus		5	0	2	2	0	2	1	0	2	1	2	2	3	1	3	3	2	2	1	2	0	2	2	1	0	0	1	0	3	1	1	0	1	2	2	1
Triassocatinius brachynotus		5	?	2	2	0	2	1	0	2	1	2	2	3	1	3	3	2	2	1	2	0	2	1	?	?	?	?	?	?	?	?	0	1	2	2	1
Elateridium angustius		5	0	2	2	0	2	1	0	0	1	2	2	3	1	3	3	2	2	1	2	0	2	2	0	1	0	0	0	3	2	1	0	1	2	2	1
Elateridium wianamattense		5	?	2	2	0	2	?	0	1	1	2	2	?	1	?	3	2	2	1	2	0	2	1	0	1	?	?	?	?	?	?	0	1	2	2	1
Hadeocoleus pelopius		5	?	2	2	0	2	?	0	?	1	2	2	?	2	?	3	2	2	?	2	0	2	?	0	1	?	?	?	?	?	?	0	1	2	2	1
Dytiscoidea indet. NIGP162054	Zheng D, Chang S C, Wang H, et al. Middle-Late Triassic insect radiation revealed by diverse fossils and isotopic ages from China[J]. Science advances, 2018, 4(9): eaat1380.	5	0	2	2	0	2	1	0	1	1	2	2	3	1	3	3	2	2	1	2	0	2	0	?	?	1	0	?	2	2	?	0	1	2	2	1
Elateriformia indet. NIGP162053	Zheng D, Chang S C, Wang H, et al. Middle-Late Triassic insect radiation revealed by diverse fossils and isotopic ages from China[J]. Science advances, 2018, 4(9): eaat1380.	5	0	2	2	0	?	1	0	1	?	?	0	3	1	3	3	2	2	1	2	0	2	0	?	?	0	1	?	3	?	?	0	1	2	?	1
Flichea lotharingiaca		5	2	2	2	0	2	1	0	0	1	2	2	3	1	3	3	2	2	1	2	0	2	0	1	1	?	?	?	?	?	?	0	1	2	2	1
Triaplus laticoxa		5	0	2	2	0	2	1	0	2	1	2	2	3	1	3	3	2	2	1	2	0	2	2	?	?	0	1	?	3	?	?	0	1	2	2	1
Sogdodromeus altus		5	0	2	2	0	2	1	0	2	1	2	2	3	1	3	3	2	2	1	2	0	2	0	?	0	0	1	0	3	?	?	0	1	2	2	1
A6875	Papier F, Nel A, Grauvogel-Stamm L, et al. La diversité des Coleoptera (Insecta) du Trias dans le nord-est de la France[J]. Geodiversitas, 2005, 27(2): 181-199.	5	0	2	2	0	0	1	0	0	?	1	0	3	1	3	3	2	2	1	2	0	2	2	?	?	0	1	?	3	?	?	1	1	2	1	1
A7006	Papier F, Nel A, Grauvogel-Stamm L, et al. La diversité des Coleoptera (Insecta) du Trias dans le nord-est de la France[J]. Geodiversitas, 2005, 27(2): 181-199.	5	0	2	2	0	2	1	0	2	1	2	2	3	1	3	3	2	2	1	2	0	2	2	?	?	0	1	0	3	?	?	0	1	2	2	0
A7331	Papier F, Nel A, Grauvogel-Stamm L, et al. La diversité des Coleoptera (Insecta) du Trias dans le nord-est de la France[J]. Geodiversitas, 2005, 27(2): 181-199.	5	0	2	2	0	0	1	0	1	1	1	1	3	1	3	3	2	2	1	2	0	2	2	?	?	0	1	0	3	?	?	1	1	2	1	1
A7172	Papier F, Nel A, Grauvogel-Stamm L, et al. La diversité des Coleoptera (Insecta) du Trias dans le nord-est de la France[J]. Geodiversitas, 2005, 27(2): 181-199.	5	0	2	2	0	0	1	0	2	1	?	?	3	1	3	3	2	2	1	2	0	2	2	?	?	1	0	0	?	2	?	1	1	2	1	1
A6641	Papier F, Nel A, Grauvogel-Stamm L, et al. La diversité des Coleoptera (Insecta) du Trias dans le nord-est de la France[J]. Geodiversitas, 2005, 27(2): 181-199.	5	0	2	2	0	2	1	0	2	1	2	2	3	1	3	3	2	2	1	2	0	2	0	?	?	1	0	0	?	2	?	0	1	2	2	0
A6981	Papier F, Nel A, Grauvogel-Stamm L, et al. La diversité des Coleoptera (Insecta) du Trias dans le nord-est de la France[J]. Geodiversitas, 2005, 27(2): 181-199.	5	0	2	2	0	0	1	0	1	1	?	0	3	1	3	3	2	2	1	2	0	2	0	?	?	1	0	?	?	2	?	?	1	2	1	1
A6773	Papier F, Nel A, Grauvogel-Stamm L, et al. La diversité des Coleoptera (Insecta) du Trias dans le nord-est de la France[J]. Geodiversitas, 2005, 27(2): 181-199.	5	0	2	2	0	0	1	0	1	?	1	1	3	1	3	3	2	2	1	2	0	2	1	?	?	0	1	0	3	?	?	1	1	2	1	1
A7025	Papier F, Nel A, Grauvogel-Stamm L, et al. La diversité des Coleoptera (Insecta) du Trias dans le nord-est de la France[J]. Geodiversitas, 2005, 27(2): 181-199.	5	0	2	2	0	2	1	0	1	1	2	2	3	1	3	3	2	2	1	2	0	2	2	?	?	1	0	0	?	2	?	0	1	2	2	0
A6639	Papier F, Nel A, Grauvogel-Stamm L, et al. La diversité des Coleoptera (Insecta) du Trias dans le nord-est de la France[J]. Geodiversitas, 2005, 27(2): 181-199.	5	0	2	2	0	0	1	0	1	?	?	0	3	1	3	3	2	2	1	2	0	2	2	?	?	0	1	?	3	?	?	1	1	2	1	1
A6952	Papier F, Nel A, Grauvogel-Stamm L, et al. La diversité des Coleoptera (Insecta) du Trias dans le nord-est de la France[J]. Geodiversitas, 2005, 27(2): 181-199.	5	0	2	2	0	0	1	0	2	1	1	1	3	1	3	3	2	2	1	2	0	2	2	?	?	1	0	0	?	2	?	1	1	2	1	1
A6664	Papier F, Nel A, Grauvogel-Stamm L, et al. La diversité des Coleoptera (Insecta) du Trias dans le nord-est de la France[J]. Geodiversitas, 2005, 27(2): 181-199.	5	2	2	2	0	0	1	0	1	?	?	?	3	1	3	3	2	2	1	2	0	2	0	?	?	0	1	0	3	?	?	?	1	2	?	1
A6801	Papier F, Nel A, Grauvogel-Stamm L, et al. La diversité des Coleoptera (Insecta) du Trias dans le nord-est de la France[J]. Geodiversitas, 2005, 27(2): 181-199.	5	0	2	2	0	2	1	0	2	1	2	2	3	1	3	3	2	2	1	2	0	2	1	?	?	0	1	0	3	?	?	0	1	2	2	0
A6969	Papier F, Nel A, Grauvogel-Stamm L, et al. La diversité des Coleoptera (Insecta) du Trias dans le nord-est de la France[J]. Geodiversitas, 2005, 27(2): 181-199.	5	0	2	2	0	0	1	0	1	1	?	0	3	1	3	3	2	2	1	2	0	2	1	?	?	1	0	0	?	2	?	1	1	2	1	1
A6673	Papier F, Nel A, Grauvogel-Stamm L, et al. La diversité des Coleoptera (Insecta) du Trias dans le nord-est de la France[J]. Geodiversitas, 2005, 27(2): 181-199.	5	0	2	2	0	2	1	0	2	1	2	2	3	1	3	3	2	2	1	2	0	2	0	0	1	1	0	?	?	2	?	0	1	2	2	1
A6690	Papier F, Nel A, Grauvogel-Stamm L, et al. La diversité des Coleoptera (Insecta) du Trias dans le nord-est de la France[J]. Geodiversitas, 2005, 27(2): 181-199.	5	0	0	1	0	2	1	0	1	1	2	2	3	1	3	0	1	?	?	1	0	2	1	?	1	1	0	0	?	2	?	0	1	1	2	1
A6669	Papier F, Nel A, Grauvogel-Stamm L, et al. La diversité des Coleoptera (Insecta) du Trias dans le nord-est de la France[J]. Geodiversitas, 2005, 27(2): 181-199.	5	0	1	1	0	2	1	0	2	1	2	2	3	1	3	0	1	?	1	1	0	2	0	?	1	0	1	?	3	?	?	0	1	?	2	1
A7364	Papier F, Nel A, Grauvogel-Stamm L, et al. La diversité des Coleoptera (Insecta) du Trias dans le nord-est de la France[J]. Geodiversitas, 2005, 27(2): 181-199.	5	1	1	1	0	2	1	0	2	1	2	2	3	1	3	?	1	?	1	?	0	2	1	0	1	1	0	0	?	2	?	0	1	?	2	1
A6713	Papier F, Nel A, Grauvogel-Stamm L, et al. La diversité des Coleoptera (Insecta) du Trias dans le nord-est de la France[J]. Geodiversitas, 2005, 27(2): 181-199.	5	0	?	1	0	2	1	0	2	1	2	2	3	1	3	1	0	0	1	?	0	2	2	?	1	1	0	0	?	2	?	0	1	1	2	1
A6727	Papier F, Nel A, Grauvogel-Stamm L, et al. La diversité des Coleoptera (Insecta) du Trias dans le nord-est de la France[J]. Geodiversitas, 2005, 27(2): 181-199.	5	0	?	1	0	2	1	0	1	1	2	2	3	1	3	1	0	1	1	?	0	2	0	?	1	1	0	?	?	2	?	0	1	1	2	1
A6684	Papier F, Nel A, Grauvogel-Stamm L, et al. La diversité des Coleoptera (Insecta) du Trias dans le nord-est de la France[J]. Geodiversitas, 2005, 27(2): 181-199.	5	2	?	1	0	2	1	0	2	1	2	2	3	1	3	0	1	1	1	?	0	2	0	?	1	?	?	0	?	?	?	0	1	?	2	1
A6755	Papier F, Nel A, Grauvogel-Stamm L, et al. La diversité des Coleoptera (Insecta) du Trias dans le nord-est de la France[J]. Geodiversitas, 2005, 27(2): 181-199.	5	0	0	1	0	2	1	0	3	1	2	2	3	1	3	1	1	0	1	1	0	2	1	?	1	?	?	?	?	?	?	0	1	1	2	1
A9346	Papier F, Nel A, Grauvogel-Stamm L, et al. La diversité des Coleoptera (Insecta) du Trias dans le nord-est de la France[J]. Geodiversitas, 2005, 27(2): 181-199.	5	0	2	2	0	2	1	0	1	1	2	2	3	1	3	3	2	2	1	2	0	2	1	1	1	0	1	0	3	?	?	0	1	2	2	1
A7598	Papier F, Nel A, Grauvogel-Stamm L, et al. La diversité des Coleoptera (Insecta) du Trias dans le nord-est de la France[J]. Geodiversitas, 2005, 27(2): 181-199.	5	0	2	2	0	2	1	0	2	1	2	2	3	1	3	3	2	2	1	2	0	2	0	1	1	0	1	0	3	?	?	0	1	2	2	1
A7445	Papier F, Nel A, Grauvogel-Stamm L, et al. La diversité des Coleoptera (Insecta) du Trias dans le nord-est de la France[J]. Geodiversitas, 2005, 27(2): 181-199.	5	0	2	2	0	2	1	0	2	1	2	2	3	1	3	3	2	2	1	2	0	2	0	1	1	1	0	0	?	2	?	0	1	2	2	1
A7379	Papier F, Nel A, Grauvogel-Stamm L, et al. La diversité des Coleoptera (Insecta) du Trias dans le nord-est de la France[J]. Geodiversitas, 2005, 27(2): 181-199.	5	0	2	2	0	2	1	0	2	1	2	2	3	1	3	3	2	2	1	2	0	2	1	1	1	0	1	?	3	?	?	0	1	2	2	1
A7577	Papier F, Nel A, Grauvogel-Stamm L, et al. La diversité des Coleoptera (Insecta) du Trias dans le nord-est de la France[J]. Geodiversitas, 2005, 27(2): 181-199.	5	2	2	2	0	2	1	0	1	1	2	2	3	1	3	3	2	2	1	2	0	2	2	1	1	0	1	?	3	?	?	0	1	2	2	1
A7036	Papier F, Nel A, Grauvogel-Stamm L, et al. La diversité des Coleoptera (Insecta) du Trias dans le nord-est de la France[J]. Geodiversitas, 2005, 27(2): 181-199.	5	0	2	2	0	2	1	0	2	1	2	2	3	1	3	3	2	2	1	2	0	2	0	1	1	1	0	0	?	2	?	0	1	2	2	1
A7048	Papier F, Nel A, Grauvogel-Stamm L, et al. La diversité des Coleoptera (Insecta) du Trias dans le nord-est de la France[J]. Geodiversitas, 2005, 27(2): 181-199.	5	?	2	2	0	2	1	0	0	1	2	2	3	1	3	3	2	2	?	2	0	2	?	1	1	1	0	0	?	2	?	0	1	2	2	1
A6636	Papier F, Nel A, Grauvogel-Stamm L, et al. La diversité des Coleoptera (Insecta) du Trias dans le nord-est de la France[J]. Geodiversitas, 2005, 27(2): 181-199.	5	0	2	2	0	2	1	0	?	1	2	2	3	1	3	3	2	2	1	2	0	2	1	1	1	?	?	?	?	?	?	0	1	2	2	1
A6632	Papier F, Nel A, Grauvogel-Stamm L, et al. La diversité des Coleoptera (Insecta) du Trias dans le nord-est de la France[J]. Geodiversitas, 2005, 27(2): 181-199.	5	0	2	2	0	2	1	0	1	1	2	2	3	1	3	3	2	2	1	2	0	2	1	1	1	0	1	?	3	?	?	0	1	2	2	1
A6634	Papier F, Nel A, Grauvogel-Stamm L, et al. La diversité des Coleoptera (Insecta) du Trias dans le nord-est de la France[J]. Geodiversitas, 2005, 27(2): 181-199.	5	0	2	2	0	2	1	0	2	1	2	2	3	1	3	3	2	2	1	2	0	2	0	1	1	?	?	0	?	?	?	0	1	2	2	1
