# Supplementary material for: Early evolution of beetles regulated by the end-Permian deforestation
Source: eLife. 2021 Nov 8;10:e72692. doi: 10.7554/eLife.72692 (PMC8585485; doi:10.7554/eLife.72692)
Supplement: Figure 4—source data 2. [file elife-72692-fig4-data2.xlsx]

## Sheet: PcoA
Group 1
	Mord
		Genus
			POV			SOV
			povtest(testdataEP_MP)			sovtest(testdataEP_MP)
			0.9996			1
			povtest(testdataMP_LP)			sovtest(testdataMP_LP)
			0.8908			0.8352
			povtest(testdataLP_ET)			sovtest(testdataLP_ET)
			0.2254			0.0222
			povtest(testdataET_MT)			sovtest(testdataET_MT)
			0.0758			0.5172
			povtest(testdataLP_MT)			sovtest(testdataLP_MT)
			0			0
		Species
			POV			SOV
			povtest(testdataEP_MP)			sovtest(testdataEP_MP)
			0.9994			1
			povtest(testdataMP_LP)			sovtest(testdataMP_LP)
			0.7016			0.5744
			povtest(testdataLP_ET)			sovtest(testdataLP_ET)
			0.117			0.0318
			povtest(testdataET_MT)			sovtest(testdataET_MT)
			0.1504			0.3834
			povtest(testdataLP_MT)			sovtest(testdataLP_MT)
			0			0
	GED
		Genus
			POV			SOV
			povtest(testdataEP_MP)			sovtest(testdataEP_MP)
			0.9994			1
			povtest(testdataMP_LP)			sovtest(testdataMP_LP)
			0.8712			0.8098
			povtest(testdataLP_ET)			sovtest(testdataLP_ET)
			0.1586			0.049
			povtest(testdataET_MT)			sovtest(testdataET_MT)
			0.1406			0.3638
			povtest(testdataLP_MT)			sovtest(testdataLP_MT)
			0			0
		Species
			POV			SOV
			povtest(testdataEP_MP)			sovtest(testdataEP_MP)
			0.9994			1
			povtest(testdataMP_LP)			sovtest(testdataMP_LP)
			0.6724			0.5596
			povtest(testdataLP_ET)			sovtest(testdataLP_ET)
			0.1002			0.0548
			povtest(testdataET_MT)			sovtest(testdataET_MT)
			0.1734			0.2814
			povtest(testdataLP_MT)			sovtest(testdataLP_MT)
			0			0
Group 2
	Mord
		Genus
			POV			SOV
			povtest(testdataEP_MP)			sovtest(testdataEP_MP)
			0.9994			1
			povtest(testdataMP_LP)			sovtest(testdataMP_LP)
			0.888			0.834
			povtest(testdataLP_ET)			sovtest(testdataLP_ET)
			0			0
			povtest(testdataET_MT)			sovtest(testdataET_MT)
			0.618			0.864
			povtest(testdataLP_MT)			sovtest(testdataLP_MT)
			0			0
		Species
			POV			SOV
			povtest(testdataEP_MP)			sovtest(testdataEP_MP)
			0.9994			1
			povtest(testdataMP_LP)			sovtest(testdataMP_LP)
			0.6932			0.57
			povtest(testdataLP_ET)			sovtest(testdataLP_ET)
			0			0
			povtest(testdataET_MT)			sovtest(testdataET_MT)
			0.12			0.2156
			povtest(testdataLP_MT)			sovtest(testdataLP_MT)
			0			0
	GED
		Genus
			POV			SOV
			povtest(testdataEP_MP)			sovtest(testdataEP_MP)
			0.9996			0.9998
			povtest(testdataMP_LP)			sovtest(testdataMP_LP)
			0.8692			0.9998
			povtest(testdataLP_ET)			sovtest(testdataLP_ET)
			0			0
			povtest(testdataET_MT)			sovtest(testdataET_MT)
			0.7186			0.8384
			povtest(testdataLP_MT)			sovtest(testdataLP_MT)
			0			0
		Species
			POV			SOV
			povtest(testdataEP_MP)			sovtest(testdataEP_MP)
			0.9996			1
			povtest(testdataMP_LP)			sovtest(testdataMP_LP)
			0.6774			0.5508
			povtest(testdataLP_ET)			sovtest(testdataLP_ET)
			0			0
			povtest(testdataET_MT)			sovtest(testdataET_MT)
			0.1632			0.2374
			povtest(testdataLP_MT)			sovtest(testdataLP_MT)
			0			0

## Sheet: NMDS
Group 1
	Mord
		Genus
			POV			SOV
			povtest(testdataEP_MP)			sovtest(testdataEP_MP)
			1			1
			povtest(testdataMP_LP)			sovtest(testdataMP_LP)
			0.3374			0.287
			povtest(testdataLP_ET)			sovtest(testdataLP_ET)
			0.0178			0.0428
			povtest(testdataET_MT)			sovtest(testdataET_MT)
			0.9428			0.8134
			povtest(testdataLP_MT)			sovtest(testdataLP_MT)
			0			0.0032
		Species
			POV			SOV
			povtest(testdataEP_MP)			sovtest(testdataEP_MP)
			1			1
			povtest(testdataMP_LP)			sovtest(testdataMP_LP)
			0.0606			0.0742
			povtest(testdataLP_ET)			sovtest(testdataLP_ET)
			0.009			0.0052
			povtest(testdataET_MT)			sovtest(testdataET_MT)
			0.9618			0.9714
			povtest(testdataLP_MT)			sovtest(testdataLP_MT)
			0			0.0062
	GED
		Genus
			POV			SOV
			povtest(testdataEP_MP)			sovtest(testdataEP_MP)
			1			1
			povtest(testdataMP_LP)			sovtest(testdataMP_LP)
			0.3214			0.3162
			povtest(testdataLP_ET)			sovtest(testdataLP_ET)
			0.0274			0.0592
			povtest(testdataET_MT)			sovtest(testdataET_MT)
			0.916			0.7206
			povtest(testdataLP_MT)			sovtest(testdataLP_MT)
			0			0.0006
		Species
			POV			SOV
			povtest(testdataEP_MP)			sovtest(testdataEP_MP)
			1			1
			povtest(testdataMP_LP)			sovtest(testdataMP_LP)
			0.0578			0.05
			povtest(testdataLP_ET)			sovtest(testdataLP_ET)
			0.016			0.0068
			povtest(testdataET_MT)			sovtest(testdataET_MT)
			0.9214			0.9456
			povtest(testdataLP_MT)			sovtest(testdataLP_MT)
			0.0002			0.0018
Group 2
	Mord
		Genus
			POV			SOV
			povtest(testdataEP_MP)			sovtest(testdataEP_MP)
			1			1
			povtest(testdataMP_LP)			sovtest(testdataMP_LP)
			0.3422			0.2942
			povtest(testdataLP_ET)			sovtest(testdataLP_ET)
			0			0.001
			povtest(testdataET_MT)			sovtest(testdataET_MT)
			0.9284			0.8814
			povtest(testdataLP_MT)			sovtest(testdataLP_MT)
			0.0004			0.0086
		Species
			POV			SOV
			povtest(testdataEP_MP)			sovtest(testdataEP_MP)
			1			1
			povtest(testdataMP_LP)			sovtest(testdataMP_LP)
			0.061			0.0654
			povtest(testdataLP_ET)			sovtest(testdataLP_ET)
			0			0
			povtest(testdataET_MT)			sovtest(testdataET_MT)
			0.988			0.9996
			povtest(testdataLP_MT)			sovtest(testdataLP_MT)
			0.001			0.0462
	GED
		Genus
			POV			SOV
			povtest(testdataEP_MP)			sovtest(testdataEP_MP)
			1			1
			povtest(testdataMP_LP)			sovtest(testdataMP_LP)
			0.3134			0.2952
			povtest(testdataLP_ET)			sovtest(testdataLP_ET)
			0			0.0002
			povtest(testdataET_MT)			sovtest(testdataET_MT)
			0.9354			0.9206
			povtest(testdataLP_MT)			sovtest(testdataLP_MT)
			0.0014			0.0072
		Species
			POV			SOV
			povtest(testdataEP_MP)			sovtest(testdataEP_MP)
			1			1
			povtest(testdataMP_LP)			sovtest(testdataMP_LP)
			0.0584			0.056
			povtest(testdataLP_ET)			sovtest(testdataLP_ET)
			0			0
			povtest(testdataET_MT)			sovtest(testdataET_MT)
			0.9848			0.9994
			povtest(testdataLP_MT)			sovtest(testdataLP_MT)
			0			0.019
